# Supplementary material
Source: MDPI journal article supplement (https://www.mdpi.com/2075-163X/13/5/694)
Supplement: s1 [file s1]

**Table S1.** Calculated geothermal parameters obtained from magnetic data.

| Block | Longitude<br>(°) | Latitude<br>(°) | Depth to<br>centroid,<br>Z <sub>0</sub> (km) | Depth to<br>the top<br>boundary<br>Z <sub>t</sub> (km) | Curie<br>point<br>depth,<br>Z <sub>b</sub> (km) | Geotherm<br>al gradient<br>(°C/km) | Heat flow<br>(mW/m <sup>2</sup> ) |
|-------|------------------|-----------------|----------------------------------------------|--------------------------------------------------------|-------------------------------------------------|------------------------------------|-----------------------------------|
| 1     | 35.000           | 16.000          | 6.99                                         | 4.32                                                   | 9.66                                            | 60.02                              | 150.06                            |
| 2     | 35.250           | 16.000          | 5.66                                         | 3.28                                                   | 8.04                                            | 72.11                              | 180.28                            |
| 3     | 35.500           | 16.000          | 5.84                                         | 3.41                                                   | 8.27                                            | 70.11                              | 175.27                            |
| 4     | 35.750           | 16.000          | 5.51                                         | 3.57                                                   | 7.45                                            | 77.82                              | 194.55                            |
| 5     | 36.000           | 16.000          | 6.09                                         | 2.97                                                   | 9.21                                            | 62.95                              | 157.39                            |
| 6     | 36.250           | 16.000          | 5.69                                         | 4.47                                                   | 6.91                                            | 83.90                              | 209.75                            |
| 7     | 36.500           | 16.000          | 5.54                                         | 3.53                                                   | 7.55                                            | 76.79                              | 191.98                            |
| 8     | 36.750           | 16.000          | 5.60                                         | 3.76                                                   | 7.44                                            | 77.93                              | 194.81                            |
| 9     | 37.000           | 16.000          | 6.61                                         | 3.10                                                   | 10.12                                           | 57.30                              | 143.24                            |
| 10    | 37.250           | 16.000          | 6.00                                         | 3.74                                                   | 8.26                                            | 70.19                              | 175.48                            |
| 11    | 37.500           | 16.000          | 7.65                                         | 5.66                                                   | 9.64                                            | 60.15                              | 150.37                            |
| 12    | 37.750           | 16.000          | 6.71                                         | 3.38                                                   | 10.04                                           | 57.75                              | 144.38                            |
| 13    | 38.000           | 16.000          | 6.90                                         | 3.85                                                   | 9.95                                            | 58.27                              | 145.68                            |
| 14    | 38.250           | 16.000          | 6.96                                         | 3.48                                                   | 10.44                                           | 55.54                              | 138.85                            |
| 15    | 38.500           | 16.000          | 6.67                                         | 4.33                                                   | 9.01                                            | 64.35                              | 160.88                            |
| 16    | 38.750           | 16.000          | 6.19                                         | 4.21                                                   | 8.17                                            | 70.97                              | 177.41                            |
| 17    | 39.000           | 16.000          | 5.52                                         | 2.95                                                   | 8.09                                            | 71.67                              | 179.17                            |
| 18    | 39.250           | 16.000          | 5.79                                         | 3.46                                                   | 8.12                                            | 71.40                              | 178.51                            |
| 19    | 39.500           | 16.000          | 8.06                                         | 3.77                                                   | 12.35                                           | 46.95                              | 117.38                            |
| 20    | 39.750           | 16.000          | 6.32                                         | 2.56                                                   | 10.08                                           | 57.52                              | 143.81                            |
| 21    | 40.000           | 16.000          | 5.63                                         | 3.31                                                   | 7.95                                            | 72.93                              | 182.32                            |
| 22    | 40.250           | 16.000          | 6.11                                         | 3.09                                                   | 9.13                                            | 63.51                              | 158.76                            |
| 23    | 40.500           | 16.000          | 7.08                                         | 3.63                                                   | 10.53                                           | 55.07                              | 137.66                            |
| 24    | 40.750           | 16.000          | 6.27                                         | 3.44                                                   | 9.10                                            | 63.72                              | 159.29                            |
| 25    | 41.000           | 16.000          | 6.51                                         | 3.69                                                   | 9.33                                            | 62.15                              | 155.36                            |
| 26    | 41.250           | 16.000          | 6.48                                         | 3.11                                                   | 9.85                                            | 58.87                              | 147.16                            |
| 27    | 41.500           | 16.000          | 7.60                                         | 2.59                                                   | 12.61                                           | 45.98                              | 114.96                            |
| 28    | 41.750           | 16.000          | 7.66                                         | 3.61                                                   | 11.71                                           | 49.52                              | 123.79                            |
| 29    | 42.000           | 16.000          | 8.28                                         | 3.97                                                   | 12.59                                           | 46.06                              | 115.14                            |
| 30    | 42.250           | 16.000          | 6.36                                         | 2.92                                                   | 9.80                                            | 59.17                              | 147.91                            |
| 31    | 42.500           | 16.000          | 6.30                                         | 5.95                                                   | 6.65                                            | 87.18                              | 217.95                            |
| 32    | 42.750           | 16.000          | 8.30                                         | 6.61                                                   | 9.99                                            | 58.04                              | 145.10                            |
| 33    | 43.000           | 16.000          | 7.97                                         | 5.60                                                   | 10.34                                           | 56.08                              | 140.19                            |
| 34    | 43.250           | 16.000          | 7.84                                         | 4.31                                                   | 11.37                                           | 51.00                              | 127.49                            |
| 35    | 43.500           | 16.000          | 8.50                                         | 6.06                                                   | 10.94                                           | 53.00                              | 132.50                            |
| 36    | 43.750           | 16.000          | 10.28                                        | 5.75                                                   | 14.81                                           | 39.15                              | 97.89                             |
| 37    | 44.000           | 16.000          | 9.88                                         | 5.46                                                   | 14.30                                           | 40.55                              | 101.38                            |
| 38    | 44.250           | 16.000          | 9.00                                         | 5.53                                                   | 12.47                                           | 46.50                              | 116.25                            |
| 39    | 44.500           | 16.000          | 11.28                                        | 6.95                                                   | 15.61                                           | 37.15                              | 92.87                             |
| 40    | 44.750           | 16.000          | 8.37                                         | 5.68                                                   | 11.06                                           | 52.43                              | 131.07                            |
| 41    | 45.000           | 16.000          | 10.53                                        | 7.39                                                   | 13.67                                           | 42.42                              | 106.05                            |
| 42    | 45.250           | 16.000          | 8.84                                         | 7.23                                                   | 10.45                                           | 55.49                              | 138.72                            |
| 43    | 45.500           | 16.000          | 9.83                                         | 7.91                                                   | 11.75                                           | 49.35                              | 123.37                            |
| 44    | 45.750           | 16.000          | 10.61                                        | 6.21                                                   | 15.01                                           | 38.63                              | 96.58                             |
| 45    | 46.000           | 16.000          | 8.04                                         | 4.50                                                   | 11.58                                           | 50.07                              | 125.18                            |

|    |        |        |       |      |       |       |        |
|----|--------|--------|-------|------|-------|-------|--------|
| 46 | 46.250 | 16.000 | 9.68  | 5.15 | 14.21 | 40.81 | 102.02 |
| 47 | 46.500 | 16.000 | 9.57  | 5.52 | 13.62 | 42.58 | 106.44 |
| 48 | 46.750 | 16.000 | 11.05 | 6.55 | 15.55 | 37.29 | 93.23  |
| 49 | 47.000 | 16.000 | 9.89  | 6.23 | 13.55 | 42.79 | 106.99 |
| 50 | 47.250 | 16.000 | 10.11 | 6.09 | 14.13 | 41.04 | 102.60 |
| 51 | 47.500 | 16.000 | 9.68  | 5.90 | 13.46 | 43.08 | 107.70 |
| 52 | 47.750 | 16.000 | 7.87  | 5.74 | 10.00 | 57.98 | 144.96 |
| 53 | 48.000 | 16.000 | 8.90  | 5.98 | 11.82 | 49.06 | 122.64 |
| 54 | 35.000 | 16.250 | 8.21  | 6.65 | 9.77  | 59.35 | 148.37 |
| 55 | 35.250 | 16.250 | 7.46  | 4.01 | 10.91 | 53.15 | 132.87 |
| 56 | 35.500 | 16.250 | 6.99  | 4.29 | 9.69  | 59.84 | 149.59 |
| 57 | 35.750 | 16.250 | 6.42  | 4.45 | 8.39  | 69.11 | 172.76 |
| 58 | 36.000 | 16.250 | 6.82  | 5.00 | 8.64  | 67.11 | 167.77 |
| 59 | 36.250 | 16.250 | 7.57  | 5.31 | 9.83  | 58.99 | 147.46 |
| 60 | 36.500 | 16.250 | 6.47  | 5.47 | 7.47  | 77.61 | 194.03 |
| 61 | 36.750 | 16.250 | 6.88  | 5.70 | 8.06  | 71.93 | 179.83 |
| 62 | 37.000 | 16.250 | 7.29  | 5.80 | 8.78  | 66.04 | 165.09 |
| 63 | 37.250 | 16.250 | 6.26  | 5.06 | 7.46  | 77.72 | 194.29 |
| 64 | 37.500 | 16.250 | 6.84  | 5.20 | 8.48  | 68.37 | 170.93 |
| 65 | 37.750 | 16.250 | 6.57  | 5.42 | 7.72  | 75.10 | 187.75 |
| 66 | 38.000 | 16.250 | 6.94  | 4.94 | 8.94  | 64.86 | 162.14 |
| 67 | 38.250 | 16.250 | 6.27  | 5.72 | 6.82  | 85.01 | 212.52 |
| 68 | 38.500 | 16.250 | 5.39  | 4.75 | 6.03  | 96.14 | 240.34 |
| 69 | 38.750 | 16.250 | 6.39  | 6.70 | 6.08  | 95.35 | 238.37 |
| 70 | 39.000 | 16.250 | 6.84  | 7.04 | 6.64  | 87.31 | 218.27 |
| 71 | 39.250 | 16.250 | 6.50  | 6.21 | 6.79  | 85.38 | 213.46 |
| 72 | 39.500 | 16.250 | 6.17  | 5.20 | 7.14  | 81.20 | 203.00 |
| 73 | 39.750 | 16.250 | 6.04  | 3.91 | 8.17  | 70.97 | 177.41 |
| 74 | 40.000 | 16.250 | 6.70  | 5.66 | 7.74  | 74.91 | 187.27 |
| 75 | 40.250 | 16.250 | 8.48  | 5.35 | 11.61 | 49.94 | 124.86 |
| 76 | 40.500 | 16.250 | 8.08  | 5.06 | 11.10 | 52.24 | 130.60 |
| 77 | 40.750 | 16.250 | 7.20  | 5.13 | 9.27  | 62.55 | 156.37 |
| 78 | 41.000 | 16.250 | 9.48  | 6.55 | 12.41 | 46.73 | 116.81 |
| 79 | 41.250 | 16.250 | 6.57  | 5.28 | 7.86  | 73.76 | 184.41 |
| 80 | 41.500 | 16.250 | 6.19  | 4.33 | 8.05  | 72.02 | 180.06 |
| 81 | 41.750 | 16.250 | 8.33  | 7.54 | 9.12  | 63.58 | 158.94 |
| 82 | 42.000 | 16.250 | 8.37  | 4.40 | 12.34 | 46.99 | 117.48 |
| 83 | 42.250 | 16.250 | 6.41  | 5.68 | 7.14  | 81.20 | 203.00 |
| 84 | 42.500 | 16.250 | 8.44  | 5.89 | 10.99 | 52.76 | 131.90 |
| 85 | 42.750 | 16.250 | 8.17  | 4.91 | 11.43 | 50.73 | 126.83 |
| 86 | 43.000 | 16.250 | 8.06  | 6.39 | 9.73  | 59.59 | 148.98 |
| 87 | 43.250 | 16.250 | 6.11  | 4.60 | 7.62  | 76.09 | 190.21 |
| 88 | 43.500 | 16.250 | 7.04  | 6.73 | 7.35  | 78.88 | 197.20 |
| 89 | 43.750 | 16.250 | 7.99  | 5.88 | 10.10 | 57.41 | 143.52 |
| 90 | 44.000 | 16.250 | 7.67  | 5.81 | 9.53  | 60.84 | 152.10 |
| 91 | 44.250 | 16.250 | 7.78  | 4.77 | 10.79 | 53.74 | 134.35 |
| 92 | 44.500 | 16.250 | 6.03  | 4.59 | 7.47  | 77.61 | 194.03 |
| 93 | 44.750 | 16.250 | 7.05  | 7.04 | 7.06  | 82.12 | 205.30 |
| 94 | 45.000 | 16.250 | 6.53  | 5.19 | 7.87  | 73.67 | 184.17 |
| 95 | 45.250 | 16.250 | 6.23  | 5.54 | 6.92  | 83.78 | 209.45 |
| 96 | 45.500 | 16.250 | 9.18  | 4.99 | 13.37 | 43.37 | 108.43 |
| 97 | 45.750 | 16.250 | 8.45  | 5.58 | 11.32 | 51.22 | 128.06 |
| 98 | 46.000 | 16.250 | 8.86  | 4.68 | 13.04 | 44.47 | 111.17 |

|     |        |        |      |      |      |        |        |
|-----|--------|--------|------|------|------|--------|--------|
| 99  | 46.250 | 16.250 | 7.07 | 5.58 | 8.56 | 67.73  | 169.33 |
| 100 | 46.500 | 16.250 | 5.72 | 5.23 | 6.21 | 93.35  | 233.38 |
| 101 | 46.750 | 16.250 | 5.45 | 3.69 | 7.21 | 80.49  | 201.22 |
| 102 | 47.000 | 16.250 | 6.68 | 5.26 | 8.10 | 71.58  | 178.95 |
| 103 | 47.250 | 16.250 | 5.35 | 4.96 | 5.74 | 100.99 | 252.48 |
| 104 | 47.500 | 16.250 | 6.97 | 6.01 | 7.93 | 73.11  | 182.78 |
| 105 | 47.750 | 16.250 | 5.62 | 5.24 | 6.00 | 96.62  | 241.55 |
| 106 | 48.000 | 16.250 | 6.06 | 5.30 | 6.82 | 85.01  | 212.52 |
| 107 | 35.000 | 16.500 | 5.74 | 5.32 | 6.16 | 94.11  | 235.28 |
| 108 | 35.250 | 16.500 | 6.59 | 6.86 | 6.32 | 91.73  | 229.32 |
| 109 | 35.500 | 16.500 | 5.82 | 5.23 | 6.41 | 90.44  | 226.10 |
| 110 | 35.750 | 16.500 | 5.79 | 5.44 | 6.14 | 94.42  | 236.04 |
| 111 | 36.000 | 16.500 | 6.00 | 4.76 | 7.24 | 80.08  | 200.19 |
| 112 | 36.250 | 16.500 | 6.83 | 6.00 | 7.66 | 75.69  | 189.22 |
| 113 | 36.500 | 16.500 | 6.68 | 6.23 | 7.13 | 81.31  | 203.28 |
| 114 | 36.750 | 16.500 | 6.67 | 5.96 | 7.38 | 78.56  | 196.40 |
| 115 | 37.000 | 16.500 | 6.57 | 5.40 | 7.74 | 74.91  | 187.27 |
| 116 | 37.250 | 16.500 | 6.42 | 6.35 | 6.49 | 89.33  | 223.32 |
| 117 | 37.500 | 16.500 | 6.41 | 5.92 | 6.90 | 84.02  | 210.05 |
| 118 | 37.750 | 16.500 | 6.47 | 6.01 | 6.93 | 83.66  | 209.14 |
| 119 | 38.000 | 16.500 | 6.37 | 5.98 | 6.76 | 85.76  | 214.40 |
| 120 | 38.250 | 16.500 | 5.85 | 4.98 | 6.72 | 86.27  | 215.68 |
| 121 | 38.500 | 16.500 | 5.52 | 4.81 | 6.23 | 93.05  | 232.63 |
| 122 | 38.750 | 16.500 | 5.50 | 4.89 | 6.11 | 94.88  | 237.20 |
| 123 | 39.000 | 16.500 | 6.11 | 6.24 | 5.98 | 96.94  | 242.35 |
| 124 | 39.250 | 16.500 | 6.10 | 6.26 | 5.94 | 97.59  | 243.98 |
| 125 | 39.500 | 16.500 | 5.65 | 5.25 | 6.05 | 95.82  | 239.55 |
| 126 | 39.750 | 16.500 | 5.56 | 4.98 | 6.14 | 94.42  | 236.04 |
| 127 | 40.000 | 16.500 | 5.51 | 5.07 | 5.95 | 97.43  | 243.57 |
| 128 | 40.250 | 16.500 | 6.91 | 7.21 | 6.61 | 87.71  | 219.27 |
| 129 | 40.500 | 16.500 | 6.72 | 5.35 | 8.09 | 71.67  | 179.17 |
| 130 | 40.750 | 16.500 | 7.00 | 5.53 | 8.47 | 68.45  | 171.13 |
| 131 | 41.000 | 16.500 | 6.69 | 4.92 | 8.46 | 68.53  | 171.33 |
| 132 | 41.250 | 16.500 | 5.96 | 4.02 | 7.90 | 73.39  | 183.47 |
| 133 | 41.500 | 16.500 | 5.84 | 4.96 | 6.72 | 86.27  | 215.68 |
| 134 | 41.750 | 16.500 | 6.07 | 5.33 | 6.81 | 85.13  | 212.83 |
| 135 | 42.000 | 16.500 | 6.28 | 5.66 | 6.90 | 84.02  | 210.05 |
| 136 | 42.250 | 16.500 | 6.30 | 5.99 | 6.61 | 87.71  | 219.27 |
| 137 | 42.500 | 16.500 | 6.69 | 4.76 | 8.62 | 67.26  | 168.15 |
| 138 | 42.750 | 16.500 | 6.15 | 5.53 | 6.77 | 85.63  | 214.09 |
| 139 | 43.000 | 16.500 | 5.89 | 4.97 | 6.81 | 85.13  | 212.83 |
| 140 | 43.250 | 16.500 | 6.72 | 5.90 | 7.54 | 76.89  | 192.23 |
| 141 | 43.500 | 16.500 | 6.30 | 5.72 | 6.88 | 84.27  | 210.66 |
| 142 | 43.750 | 16.500 | 6.67 | 6.19 | 7.15 | 81.08  | 202.71 |
| 143 | 44.000 | 16.500 | 7.06 | 5.98 | 8.14 | 71.23  | 178.07 |
| 144 | 44.250 | 16.500 | 7.27 | 5.52 | 9.02 | 64.28  | 160.70 |
| 145 | 44.500 | 16.500 | 5.88 | 5.35 | 6.41 | 90.44  | 226.10 |
| 146 | 44.750 | 16.500 | 7.20 | 5.15 | 9.25 | 62.68  | 156.71 |
| 147 | 45.000 | 16.500 | 6.78 | 6.01 | 7.55 | 76.79  | 191.98 |
| 148 | 45.250 | 16.500 | 6.69 | 5.89 | 7.49 | 77.41  | 193.51 |
| 149 | 45.500 | 16.500 | 6.30 | 5.07 | 7.53 | 76.99  | 192.49 |
| 150 | 45.750 | 16.500 | 7.36 | 5.80 | 8.92 | 65.00  | 162.50 |
| 151 | 46.000 | 16.500 | 6.40 | 5.19 | 7.61 | 76.19  | 190.46 |

|     |        |        |      |      |       |       |        |
|-----|--------|--------|------|------|-------|-------|--------|
| 152 | 46.250 | 16.500 | 7.18 | 4.82 | 9.54  | 60.78 | 151.94 |
| 153 | 46.500 | 16.500 | 6.73 | 4.21 | 9.25  | 62.68 | 156.71 |
| 154 | 46.750 | 16.500 | 6.92 | 5.34 | 8.50  | 68.21 | 170.53 |
| 155 | 47.000 | 16.500 | 6.59 | 5.39 | 7.79  | 74.43 | 186.06 |
| 156 | 47.250 | 16.500 | 6.45 | 4.88 | 8.02  | 72.29 | 180.73 |
| 157 | 47.500 | 16.500 | 6.30 | 5.65 | 6.95  | 83.42 | 208.54 |
| 158 | 47.750 | 16.500 | 6.41 | 6.63 | 6.19  | 93.65 | 234.14 |
| 159 | 48.000 | 16.500 | 6.69 | 5.45 | 7.93  | 73.11 | 182.78 |
| 160 | 35.000 | 16.750 | 8.48 | 4.52 | 12.44 | 46.61 | 116.53 |
| 161 | 35.250 | 16.750 | 8.08 | 4.44 | 11.72 | 49.48 | 123.69 |
| 162 | 35.500 | 16.750 | 7.20 | 5.29 | 9.11  | 63.65 | 159.11 |
| 163 | 35.750 | 16.750 | 9.48 | 5.66 | 13.30 | 43.60 | 109.00 |
| 164 | 36.000 | 16.750 | 6.57 | 5.29 | 7.85  | 73.86 | 184.64 |
| 165 | 36.250 | 16.750 | 8.73 | 6.39 | 11.07 | 52.38 | 130.95 |
| 166 | 36.500 | 16.750 | 7.04 | 5.54 | 8.54  | 67.89 | 169.73 |
| 167 | 36.750 | 16.750 | 8.03 | 5.40 | 10.66 | 54.39 | 135.98 |
| 168 | 37.000 | 16.750 | 8.81 | 5.06 | 12.56 | 46.17 | 115.42 |
| 169 | 37.250 | 16.750 | 6.24 | 4.81 | 7.67  | 75.59 | 188.97 |
| 170 | 37.500 | 16.750 | 7.88 | 5.39 | 10.37 | 55.91 | 139.79 |
| 171 | 37.750 | 16.750 | 7.77 | 5.66 | 9.88  | 58.69 | 146.72 |
| 172 | 38.000 | 16.750 | 9.25 | 6.19 | 12.31 | 47.10 | 117.76 |
| 173 | 38.250 | 16.750 | 8.09 | 5.70 | 10.48 | 55.33 | 138.32 |
| 174 | 38.500 | 16.750 | 8.31 | 5.80 | 10.82 | 53.59 | 133.97 |
| 175 | 38.750 | 16.750 | 7.88 | 5.35 | 10.41 | 55.70 | 139.25 |
| 176 | 39.000 | 16.750 | 6.07 | 5.15 | 6.99  | 82.94 | 207.35 |
| 177 | 39.250 | 16.750 | 7.10 | 6.01 | 8.19  | 70.79 | 176.98 |
| 178 | 39.500 | 16.750 | 5.95 | 5.89 | 6.01  | 96.46 | 241.14 |
| 179 | 39.750 | 16.750 | 6.16 | 5.07 | 7.25  | 79.97 | 199.92 |
| 180 | 40.000 | 16.750 | 6.91 | 5.80 | 8.02  | 72.29 | 180.73 |
| 181 | 40.250 | 16.750 | 5.57 | 4.69 | 6.45  | 89.88 | 224.70 |
| 182 | 40.500 | 16.750 | 6.36 | 5.40 | 7.32  | 79.20 | 198.01 |
| 183 | 40.750 | 16.750 | 5.71 | 4.21 | 7.21  | 80.41 | 201.03 |
| 184 | 41.000 | 16.750 | 6.52 | 2.80 | 10.24 | 56.62 | 141.56 |
| 185 | 41.250 | 16.750 | 5.47 | 2.99 | 7.95  | 72.93 | 182.32 |
| 186 | 41.500 | 16.750 | 6.10 | 3.48 | 8.72  | 66.49 | 166.23 |
| 187 | 41.750 | 16.750 | 6.89 | 3.49 | 10.29 | 56.35 | 140.87 |
| 188 | 42.000 | 16.750 | 5.36 | 3.46 | 7.26  | 79.86 | 199.64 |
| 189 | 42.250 | 16.750 | 6.11 | 4.10 | 8.12  | 71.40 | 178.51 |
| 190 | 42.500 | 16.750 | 7.00 | 4.87 | 9.13  | 63.51 | 158.76 |
| 191 | 42.750 | 16.750 | 6.14 | 4.38 | 7.90  | 73.39 | 183.47 |
| 192 | 43.000 | 16.750 | 5.71 | 3.82 | 7.60  | 76.29 | 190.71 |
| 193 | 43.250 | 16.750 | 6.11 | 4.05 | 8.17  | 70.97 | 177.41 |
| 194 | 43.500 | 16.750 | 6.39 | 3.56 | 9.22  | 62.89 | 157.22 |
| 195 | 43.750 | 16.750 | 6.47 | 2.89 | 10.05 | 57.69 | 144.24 |
| 196 | 44.000 | 16.750 | 5.58 | 3.23 | 7.93  | 73.11 | 182.78 |
| 197 | 44.250 | 16.750 | 6.24 | 5.91 | 6.57  | 88.24 | 220.60 |
| 198 | 44.500 | 16.750 | 6.54 | 5.64 | 7.44  | 77.93 | 194.81 |
| 199 | 44.750 | 16.750 | 6.45 | 5.48 | 7.42  | 78.14 | 195.34 |
| 200 | 45.000 | 16.750 | 6.38 | 5.42 | 7.34  | 78.99 | 197.47 |
| 201 | 45.250 | 16.750 | 6.07 | 3.53 | 8.61  | 67.34 | 168.35 |
| 202 | 45.500 | 16.750 | 6.19 | 3.34 | 9.04  | 64.14 | 160.35 |
| 203 | 45.750 | 16.750 | 7.99 | 3.47 | 12.51 | 46.35 | 115.88 |
| 204 | 46.000 | 16.750 | 7.98 | 3.83 | 12.13 | 47.80 | 119.51 |

|     |        |        |      |      |       |       |        |
|-----|--------|--------|------|------|-------|-------|--------|
| 205 | 46.250 | 16.750 | 6.40 | 3.54 | 9.26  | 62.61 | 156.54 |
| 206 | 46.500 | 16.750 | 8.51 | 4.48 | 12.54 | 46.24 | 115.60 |
| 207 | 46.750 | 16.750 | 5.89 | 3.92 | 7.86  | 73.76 | 184.41 |
| 208 | 47.000 | 16.750 | 8.16 | 5.45 | 10.87 | 53.34 | 133.36 |
| 209 | 47.250 | 16.750 | 6.05 | 4.72 | 7.38  | 78.56 | 196.40 |
| 210 | 47.500 | 16.750 | 5.69 | 5.52 | 5.86  | 98.93 | 247.31 |
| 211 | 47.750 | 16.750 | 7.08 | 4.33 | 9.83  | 58.99 | 147.46 |
| 212 | 48.000 | 16.750 | 5.62 | 3.19 | 8.05  | 72.02 | 180.06 |
| 213 | 35.000 | 17.000 | 5.36 | 3.37 | 7.35  | 78.88 | 197.20 |
| 214 | 35.250 | 17.000 | 5.77 | 4.29 | 7.25  | 79.97 | 199.92 |
| 215 | 35.500 | 17.000 | 5.62 | 3.48 | 7.76  | 74.71 | 186.78 |
| 216 | 35.750 | 17.000 | 5.54 | 3.89 | 7.19  | 80.63 | 201.58 |
| 217 | 36.000 | 17.000 | 6.19 | 3.61 | 8.77  | 66.11 | 165.28 |
| 218 | 36.250 | 17.000 | 4.98 | 2.83 | 7.13  | 81.31 | 203.28 |
| 219 | 36.500 | 17.000 | 6.01 | 3.46 | 8.56  | 67.73 | 169.33 |
| 220 | 36.750 | 17.000 | 5.95 | 4.29 | 7.61  | 76.19 | 190.46 |
| 221 | 37.000 | 17.000 | 5.36 | 3.95 | 6.77  | 85.63 | 214.09 |
| 222 | 37.250 | 17.000 | 6.34 | 3.99 | 8.69  | 66.72 | 166.80 |
| 223 | 37.500 | 17.000 | 6.53 | 4.23 | 8.83  | 65.66 | 164.16 |
| 224 | 37.750 | 17.000 | 7.58 | 3.93 | 11.23 | 51.63 | 129.08 |
| 225 | 38.000 | 17.000 | 5.86 | 3.68 | 8.04  | 72.11 | 180.28 |
| 226 | 38.250 | 17.000 | 6.53 | 3.11 | 9.95  | 58.27 | 145.68 |
| 227 | 38.500 | 17.000 | 7.31 | 4.29 | 10.33 | 56.13 | 140.33 |
| 228 | 38.750 | 17.000 | 5.62 | 3.85 | 7.39  | 78.45 | 196.13 |
| 229 | 39.000 | 17.000 | 6.18 | 5.04 | 7.32  | 79.20 | 198.01 |
| 230 | 39.250 | 17.000 | 5.55 | 4.65 | 6.45  | 89.88 | 224.70 |
| 231 | 39.500 | 17.000 | 7.21 | 4.40 | 10.02 | 57.87 | 144.67 |
| 232 | 39.750 | 17.000 | 6.79 | 4.59 | 8.99  | 64.49 | 161.24 |
| 233 | 40.000 | 17.000 | 6.70 | 3.83 | 9.57  | 60.59 | 151.47 |
| 234 | 40.250 | 17.000 | 6.04 | 3.46 | 8.62  | 67.26 | 168.15 |
| 235 | 40.500 | 17.000 | 6.00 | 3.27 | 8.73  | 66.41 | 166.04 |
| 236 | 40.750 | 17.000 | 6.00 | 3.74 | 8.26  | 70.19 | 175.48 |
| 237 | 41.000 | 17.000 | 7.65 | 5.66 | 9.64  | 60.15 | 150.37 |
| 238 | 41.250 | 17.000 | 6.71 | 3.38 | 10.04 | 57.75 | 144.38 |
| 239 | 41.500 | 17.000 | 6.90 | 3.85 | 9.95  | 58.27 | 145.68 |
| 240 | 41.750 | 17.000 | 6.96 | 3.48 | 10.44 | 55.54 | 138.85 |
| 241 | 42.000 | 17.000 | 6.67 | 4.33 | 9.01  | 64.35 | 160.88 |
| 242 | 42.250 | 17.000 | 6.19 | 4.21 | 8.17  | 70.97 | 177.41 |
| 243 | 42.500 | 17.000 | 5.52 | 2.95 | 8.09  | 71.67 | 179.17 |
| 244 | 42.750 | 17.000 | 5.79 | 3.46 | 8.12  | 71.40 | 178.51 |
| 245 | 43.000 | 17.000 | 8.06 | 3.77 | 12.35 | 46.95 | 117.38 |
| 246 | 43.250 | 17.000 | 6.32 | 2.56 | 10.08 | 57.52 | 143.81 |
| 247 | 43.500 | 17.000 | 5.63 | 3.31 | 7.95  | 72.93 | 182.32 |
| 248 | 43.750 | 17.000 | 6.11 | 3.09 | 9.13  | 63.51 | 158.76 |
| 249 | 44.000 | 17.000 | 7.08 | 3.63 | 10.53 | 55.07 | 137.66 |
| 250 | 44.250 | 17.000 | 6.27 | 3.44 | 9.10  | 63.72 | 159.29 |
| 251 | 44.500 | 17.000 | 6.51 | 3.69 | 9.33  | 62.15 | 155.36 |
| 252 | 44.750 | 17.000 | 6.48 | 3.11 | 9.85  | 58.87 | 147.16 |
| 253 | 45.000 | 17.000 | 7.60 | 2.59 | 12.61 | 45.98 | 114.96 |
| 254 | 45.250 | 17.000 | 7.66 | 3.61 | 11.71 | 49.52 | 123.79 |
| 255 | 45.500 | 17.000 | 8.28 | 3.97 | 12.59 | 46.06 | 115.14 |
| 256 | 45.750 | 17.000 | 6.36 | 2.92 | 9.80  | 59.17 | 147.91 |
| 257 | 46.000 | 17.000 | 6.30 | 5.95 | 6.65  | 87.18 | 217.95 |

|     |        |        |       |      |       |       |        |
|-----|--------|--------|-------|------|-------|-------|--------|
| 258 | 46.250 | 17.000 | 5.57  | 3.90 | 7.24  | 80.08 | 200.19 |
| 259 | 46.500 | 17.000 | 5.87  | 4.19 | 7.55  | 76.79 | 191.98 |
| 260 | 46.750 | 17.000 | 5.66  | 3.99 | 7.33  | 79.09 | 197.74 |
| 261 | 47.000 | 17.000 | 6.06  | 4.37 | 7.75  | 74.81 | 187.02 |
| 262 | 47.250 | 17.000 | 5.96  | 5.42 | 6.50  | 89.19 | 222.97 |
| 263 | 47.500 | 17.000 | 5.47  | 4.89 | 6.05  | 95.82 | 239.55 |
| 264 | 47.750 | 17.000 | 5.84  | 4.60 | 7.08  | 81.89 | 204.72 |
| 265 | 48.000 | 17.000 | 6.75  | 2.93 | 10.57 | 54.86 | 137.14 |
| 266 | 35.000 | 17.250 | 6.57  | 3.69 | 9.45  | 61.36 | 153.39 |
| 267 | 35.250 | 17.250 | 5.98  | 3.58 | 8.38  | 69.19 | 172.97 |
| 268 | 35.500 | 17.250 | 6.11  | 3.66 | 8.56  | 67.73 | 169.33 |
| 269 | 35.750 | 17.250 | 6.13  | 3.93 | 8.33  | 69.60 | 174.01 |
| 270 | 36.000 | 17.250 | 6.28  | 3.73 | 8.83  | 65.66 | 164.16 |
| 271 | 36.250 | 17.250 | 6.10  | 4.31 | 7.89  | 73.48 | 183.71 |
| 272 | 36.500 | 17.250 | 6.00  | 3.19 | 8.81  | 65.81 | 164.53 |
| 273 | 36.750 | 17.250 | 6.43  | 3.22 | 9.64  | 60.15 | 150.37 |
| 274 | 37.000 | 17.250 | 6.48  | 4.30 | 8.66  | 66.95 | 167.38 |
| 275 | 37.250 | 17.250 | 6.21  | 3.74 | 8.68  | 66.80 | 166.99 |
| 276 | 37.500 | 17.250 | 5.86  | 4.02 | 7.70  | 75.30 | 188.24 |
| 277 | 37.750 | 17.250 | 7.09  | 5.36 | 8.82  | 65.74 | 164.34 |
| 278 | 38.000 | 17.250 | 6.69  | 4.87 | 8.51  | 68.13 | 170.33 |
| 279 | 38.250 | 17.250 | 5.10  | 3.11 | 7.09  | 81.77 | 204.43 |
| 280 | 38.500 | 17.250 | 5.72  | 3.69 | 7.75  | 74.81 | 187.02 |
| 281 | 38.750 | 17.250 | 5.46  | 3.65 | 7.27  | 79.75 | 199.37 |
| 282 | 39.000 | 17.250 | 6.22  | 4.07 | 8.37  | 69.27 | 173.18 |
| 283 | 39.250 | 17.250 | 6.77  | 4.71 | 8.83  | 65.66 | 164.16 |
| 284 | 39.500 | 17.250 | 8.82  | 6.32 | 11.32 | 51.22 | 128.06 |
| 285 | 39.750 | 17.250 | 7.28  | 4.69 | 9.87  | 58.75 | 146.87 |
| 286 | 40.000 | 17.250 | 7.81  | 5.19 | 10.43 | 55.59 | 138.98 |
| 287 | 40.250 | 17.250 | 8.64  | 5.60 | 11.68 | 49.64 | 124.11 |
| 288 | 40.500 | 17.250 | 8.37  | 5.82 | 10.92 | 53.10 | 132.75 |
| 289 | 40.750 | 17.250 | 8.74  | 5.34 | 12.14 | 47.76 | 119.41 |
| 290 | 41.000 | 17.250 | 8.04  | 4.50 | 11.58 | 50.07 | 125.18 |
| 291 | 41.250 | 17.250 | 9.68  | 5.15 | 14.21 | 40.81 | 102.02 |
| 292 | 41.500 | 17.250 | 9.57  | 5.52 | 13.62 | 42.58 | 106.44 |
| 293 | 41.750 | 17.250 | 11.05 | 6.55 | 15.55 | 37.29 | 93.23  |
| 294 | 42.000 | 17.250 | 9.89  | 6.23 | 13.55 | 42.79 | 106.99 |
| 295 | 42.250 | 17.250 | 10.11 | 6.09 | 14.13 | 41.04 | 102.60 |
| 296 | 42.500 | 17.250 | 9.68  | 5.90 | 13.46 | 43.08 | 107.70 |
| 297 | 42.750 | 17.250 | 7.87  | 5.74 | 10.00 | 57.98 | 144.96 |
| 298 | 43.000 | 17.250 | 8.90  | 5.98 | 11.82 | 49.06 | 122.64 |
| 299 | 43.250 | 17.250 | 7.69  | 5.98 | 9.40  | 61.68 | 154.21 |
| 300 | 43.500 | 17.250 | 7.46  | 6.09 | 8.83  | 65.66 | 164.16 |
| 301 | 43.750 | 17.250 | 7.57  | 5.80 | 9.34  | 62.08 | 155.20 |
| 302 | 44.000 | 17.250 | 8.17  | 5.89 | 10.45 | 55.49 | 138.72 |
| 303 | 44.250 | 17.250 | 8.07  | 5.62 | 10.52 | 55.12 | 137.79 |
| 304 | 44.500 | 17.250 | 7.51  | 4.55 | 10.47 | 55.38 | 138.45 |
| 305 | 44.750 | 17.250 | 7.99  | 4.73 | 11.25 | 51.54 | 128.85 |
| 306 | 45.000 | 17.250 | 10.13 | 7.94 | 12.32 | 47.07 | 117.67 |
| 307 | 45.250 | 17.250 | 10.17 | 4.80 | 15.54 | 37.32 | 93.29  |
| 308 | 45.500 | 17.250 | 8.21  | 6.08 | 10.34 | 56.08 | 140.19 |
| 309 | 45.750 | 17.250 | 10.24 | 6.29 | 14.19 | 40.87 | 102.16 |
| 310 | 46.000 | 17.250 | 9.97  | 5.31 | 14.63 | 39.64 | 99.09  |

|     |        |        |      |      |       |        |        |
|-----|--------|--------|------|------|-------|--------|--------|
| 311 | 46.250 | 17.250 | 9.86 | 6.79 | 12.93 | 44.85  | 112.12 |
| 312 | 46.500 | 17.250 | 7.91 | 5.00 | 10.82 | 53.59  | 133.97 |
| 313 | 46.750 | 17.250 | 8.84 | 7.13 | 10.55 | 54.96  | 137.40 |
| 314 | 47.000 | 17.250 | 9.79 | 6.28 | 13.30 | 43.60  | 109.00 |
| 315 | 47.250 | 17.250 | 9.47 | 6.21 | 12.73 | 45.55  | 113.88 |
| 316 | 47.500 | 17.250 | 9.58 | 5.17 | 13.99 | 41.45  | 103.62 |
| 317 | 47.750 | 17.250 | 7.83 | 4.99 | 10.67 | 54.34  | 135.86 |
| 318 | 48.000 | 17.250 | 8.85 | 7.44 | 10.26 | 56.51  | 141.28 |
| 319 | 35.000 | 17.500 | 6.17 | 5.20 | 7.14  | 81.20  | 203.00 |
| 320 | 35.250 | 17.500 | 6.04 | 3.91 | 8.17  | 70.97  | 177.41 |
| 321 | 35.500 | 17.500 | 6.70 | 5.66 | 7.74  | 74.91  | 187.27 |
| 322 | 35.750 | 17.500 | 8.48 | 5.35 | 11.61 | 49.94  | 124.86 |
| 323 | 36.000 | 17.500 | 8.08 | 5.06 | 11.10 | 52.24  | 130.60 |
| 324 | 36.250 | 17.500 | 7.20 | 5.13 | 9.27  | 62.55  | 156.37 |
| 325 | 36.500 | 17.500 | 9.48 | 6.55 | 12.41 | 46.73  | 116.81 |
| 326 | 36.750 | 17.500 | 6.57 | 5.28 | 7.86  | 73.76  | 184.41 |
| 327 | 37.000 | 17.500 | 8.73 | 6.99 | 10.47 | 55.38  | 138.45 |
| 328 | 37.250 | 17.500 | 7.04 | 6.83 | 7.25  | 79.97  | 199.92 |
| 329 | 37.500 | 17.500 | 8.03 | 7.51 | 8.55  | 67.81  | 169.53 |
| 330 | 37.750 | 17.500 | 8.81 | 5.81 | 11.81 | 49.10  | 122.75 |
| 331 | 38.000 | 17.500 | 6.24 | 4.10 | 8.38  | 69.19  | 172.97 |
| 332 | 38.250 | 17.500 | 7.88 | 4.75 | 11.01 | 52.67  | 131.66 |
| 333 | 38.500 | 17.500 | 7.77 | 5.12 | 10.42 | 55.65  | 139.12 |
| 334 | 38.750 | 17.500 | 9.25 | 6.15 | 12.35 | 46.95  | 117.38 |
| 335 | 39.000 | 17.500 | 8.09 | 5.83 | 10.35 | 56.02  | 140.06 |
| 336 | 39.250 | 17.500 | 8.31 | 5.69 | 10.93 | 53.05  | 132.63 |
| 337 | 39.500 | 17.500 | 7.88 | 5.50 | 10.26 | 56.51  | 141.28 |
| 338 | 39.750 | 17.500 | 6.07 | 5.34 | 6.80  | 85.26  | 213.14 |
| 339 | 40.000 | 17.500 | 7.10 | 5.58 | 8.62  | 67.26  | 168.15 |
| 340 | 40.250 | 17.500 | 5.89 | 5.58 | 6.20  | 93.50  | 233.76 |
| 341 | 40.500 | 17.500 | 5.66 | 5.69 | 5.63  | 102.96 | 257.41 |
| 342 | 40.750 | 17.500 | 5.77 | 5.40 | 6.14  | 94.42  | 236.04 |
| 343 | 41.000 | 17.500 | 6.37 | 5.49 | 7.25  | 79.97  | 199.92 |
| 344 | 41.250 | 17.500 | 6.23 | 5.54 | 6.92  | 83.78  | 209.45 |
| 345 | 41.500 | 17.500 | 9.18 | 4.99 | 13.37 | 43.37  | 108.43 |
| 346 | 41.750 | 17.500 | 8.45 | 5.58 | 11.32 | 51.22  | 128.06 |
| 347 | 42.000 | 17.500 | 8.86 | 4.68 | 13.04 | 44.47  | 111.17 |
| 348 | 42.250 | 17.500 | 7.07 | 5.58 | 8.56  | 67.73  | 169.33 |
| 349 | 42.500 | 17.500 | 5.72 | 5.23 | 6.21  | 93.35  | 233.38 |
| 350 | 42.750 | 17.500 | 5.45 | 3.69 | 7.21  | 80.49  | 201.22 |
| 351 | 43.000 | 17.500 | 6.68 | 5.26 | 8.10  | 71.58  | 178.95 |
| 352 | 43.250 | 17.500 | 5.35 | 4.96 | 5.74  | 100.99 | 252.48 |
| 353 | 43.500 | 17.500 | 6.97 | 6.01 | 7.93  | 73.11  | 182.78 |
| 354 | 43.750 | 17.500 | 5.62 | 5.24 | 6.00  | 96.62  | 241.55 |
| 355 | 44.000 | 17.500 | 6.06 | 5.30 | 6.82  | 85.01  | 212.52 |
| 356 | 44.250 | 17.500 | 6.28 | 4.09 | 8.47  | 68.45  | 171.13 |
| 357 | 44.500 | 17.500 | 5.99 | 4.47 | 7.51  | 77.20  | 193.00 |
| 358 | 44.750 | 17.500 | 6.76 | 4.64 | 8.88  | 65.29  | 163.23 |
| 359 | 45.000 | 17.500 | 6.26 | 6.10 | 6.42  | 90.30  | 225.75 |
| 360 | 45.250 | 17.500 | 6.38 | 6.27 | 6.49  | 89.33  | 223.32 |
| 361 | 45.500 | 17.500 | 5.86 | 4.95 | 6.77  | 85.66  | 214.15 |
| 362 | 45.750 | 17.500 | 6.43 | 6.35 | 6.51  | 89.05  | 222.63 |
| 363 | 46.000 | 17.500 | 6.40 | 5.91 | 6.89  | 84.14  | 210.36 |

|     |        |        |      |      |       |       |        |
|-----|--------|--------|------|------|-------|-------|--------|
| 364 | 46.250 | 17.500 | 6.11 | 5.25 | 6.97  | 83.18 | 207.94 |
| 365 | 46.500 | 17.500 | 6.43 | 5.77 | 7.09  | 81.78 | 204.46 |
| 366 | 46.750 | 17.500 | 6.05 | 5.39 | 6.71  | 86.40 | 216.00 |
| 367 | 47.000 | 17.500 | 6.77 | 5.70 | 7.84  | 73.95 | 184.88 |
| 368 | 47.250 | 17.500 | 7.07 | 5.65 | 8.49  | 68.29 | 170.73 |
| 369 | 47.500 | 17.500 | 7.20 | 6.05 | 8.35  | 69.44 | 173.59 |
| 370 | 47.750 | 17.500 | 6.50 | 4.36 | 8.64  | 67.11 | 167.77 |
| 371 | 48.000 | 17.500 | 5.77 | 5.35 | 6.19  | 93.65 | 234.14 |
| 372 | 35.000 | 17.750 | 6.37 | 5.98 | 6.76  | 85.76 | 214.40 |
| 373 | 35.250 | 17.750 | 5.85 | 4.98 | 6.72  | 86.27 | 215.68 |
| 374 | 35.500 | 17.750 | 5.52 | 4.81 | 6.23  | 93.05 | 232.63 |
| 375 | 35.750 | 17.750 | 5.50 | 4.89 | 6.11  | 94.88 | 237.20 |
| 376 | 36.000 | 17.750 | 6.11 | 6.24 | 5.98  | 96.94 | 242.35 |
| 377 | 36.250 | 17.750 | 6.10 | 6.26 | 5.94  | 97.59 | 243.98 |
| 378 | 36.500 | 17.750 | 5.65 | 5.25 | 6.05  | 95.82 | 239.55 |
| 379 | 36.750 | 17.750 | 5.56 | 4.98 | 6.14  | 94.42 | 236.04 |
| 380 | 37.000 | 17.750 | 5.51 | 5.07 | 5.95  | 97.43 | 243.57 |
| 381 | 37.250 | 17.750 | 6.91 | 7.21 | 6.61  | 87.71 | 219.27 |
| 382 | 37.500 | 17.750 | 6.72 | 5.35 | 8.09  | 71.67 | 179.17 |
| 383 | 37.750 | 17.750 | 7.00 | 5.53 | 8.47  | 68.45 | 171.13 |
| 384 | 38.000 | 17.750 | 6.69 | 4.92 | 8.46  | 68.53 | 171.33 |
| 385 | 38.250 | 17.750 | 6.86 | 5.57 | 8.15  | 71.14 | 177.85 |
| 386 | 38.500 | 17.750 | 5.83 | 5.01 | 6.65  | 87.18 | 217.95 |
| 387 | 38.750 | 17.750 | 6.30 | 5.43 | 7.17  | 80.86 | 202.15 |
| 388 | 39.000 | 17.750 | 6.99 | 5.90 | 8.08  | 71.76 | 179.39 |
| 389 | 39.250 | 17.750 | 6.54 | 4.24 | 8.84  | 65.59 | 163.97 |
| 390 | 39.500 | 17.750 | 8.16 | 4.57 | 11.75 | 49.35 | 123.37 |
| 391 | 39.750 | 17.750 | 7.88 | 4.75 | 11.01 | 52.67 | 131.66 |
| 392 | 40.000 | 17.750 | 6.84 | 6.69 | 6.99  | 82.94 | 207.35 |
| 393 | 40.250 | 17.750 | 6.64 | 6.09 | 7.19  | 80.63 | 201.58 |
| 394 | 40.500 | 17.750 | 6.88 | 4.19 | 9.57  | 60.59 | 151.47 |
| 395 | 40.750 | 17.750 | 7.26 | 4.76 | 9.76  | 59.41 | 148.52 |
| 396 | 41.000 | 17.750 | 6.32 | 5.09 | 7.55  | 76.79 | 191.98 |
| 397 | 41.250 | 17.750 | 5.72 | 5.06 | 6.38  | 90.87 | 227.17 |
| 398 | 41.500 | 17.750 | 6.75 | 4.57 | 8.93  | 64.93 | 162.32 |
| 399 | 41.750 | 17.750 | 6.29 | 5.39 | 7.19  | 80.63 | 201.58 |
| 400 | 42.000 | 17.750 | 6.17 | 5.81 | 6.53  | 88.78 | 221.95 |
| 401 | 42.250 | 17.750 | 7.52 | 4.40 | 10.64 | 54.50 | 136.24 |
| 402 | 42.500 | 17.750 | 7.27 | 5.52 | 9.02  | 64.28 | 160.70 |
| 403 | 42.750 | 17.750 | 5.88 | 5.35 | 6.41  | 90.44 | 226.10 |
| 404 | 43.000 | 17.750 | 7.20 | 5.15 | 9.25  | 62.68 | 156.71 |
| 405 | 43.250 | 17.750 | 6.78 | 6.01 | 7.55  | 76.79 | 191.98 |
| 406 | 43.500 | 17.750 | 6.69 | 5.89 | 7.49  | 77.41 | 193.51 |
| 407 | 43.750 | 17.750 | 6.30 | 5.07 | 7.53  | 76.99 | 192.49 |
| 408 | 44.000 | 17.750 | 7.36 | 5.80 | 8.92  | 65.00 | 162.50 |
| 409 | 44.250 | 17.750 | 6.40 | 5.19 | 7.61  | 76.19 | 190.46 |
| 410 | 44.500 | 17.750 | 7.18 | 4.82 | 9.54  | 60.78 | 151.94 |
| 411 | 44.750 | 17.750 | 6.73 | 4.21 | 9.25  | 62.68 | 156.71 |
| 412 | 45.000 | 17.750 | 6.92 | 5.34 | 8.50  | 68.21 | 170.53 |
| 413 | 45.250 | 17.750 | 6.59 | 5.39 | 7.79  | 74.43 | 186.06 |
| 414 | 45.500 | 17.750 | 6.45 | 4.88 | 8.02  | 72.29 | 180.73 |
| 415 | 45.750 | 17.750 | 6.30 | 5.65 | 6.95  | 83.42 | 208.54 |
| 416 | 46.000 | 17.750 | 6.41 | 6.63 | 6.19  | 93.65 | 234.14 |



|     |        |        |      |      |       |       |        |
|-----|--------|--------|------|------|-------|-------|--------|
| 417 | 46.250 | 17.750 | 6.69 | 5.45 | 7.93  | 73.11 | 182.78 |
| 418 | 46.500 | 17.750 | 6.76 | 5.26 | 8.26  | 70.19 | 175.48 |
| 419 | 46.750 | 17.750 | 6.83 | 4.99 | 8.67  | 66.87 | 167.19 |
| 420 | 47.000 | 17.750 | 6.81 | 4.84 | 8.78  | 66.04 | 165.09 |
| 421 | 47.250 | 17.750 | 7.63 | 5.31 | 9.95  | 58.27 | 145.68 |
| 422 | 47.500 | 17.750 | 7.29 | 4.83 | 9.75  | 59.47 | 148.67 |
| 423 | 47.750 | 17.750 | 6.26 | 4.94 | 7.58  | 76.49 | 191.22 |
| 424 | 48.000 | 17.750 | 6.14 | 4.52 | 7.76  | 74.71 | 186.78 |
| 425 | 35.000 | 18.000 | 7.20 | 5.29 | 9.11  | 63.65 | 159.11 |
| 426 | 35.250 | 18.000 | 9.48 | 5.66 | 13.30 | 43.60 | 109.00 |
| 427 | 35.500 | 18.000 | 6.57 | 5.29 | 7.85  | 73.86 | 184.64 |
| 428 | 35.750 | 18.000 | 8.73 | 6.39 | 11.07 | 52.38 | 130.95 |
| 429 | 36.000 | 18.000 | 7.04 | 5.54 | 8.54  | 67.89 | 169.73 |
| 430 | 36.250 | 18.000 | 8.03 | 5.40 | 10.66 | 54.39 | 135.98 |
| 431 | 36.500 | 18.000 | 8.81 | 5.06 | 12.56 | 46.17 | 115.42 |
| 432 | 36.750 | 18.000 | 6.24 | 4.81 | 7.67  | 75.59 | 188.97 |
| 433 | 37.000 | 18.000 | 7.88 | 5.39 | 10.37 | 55.91 | 139.79 |
| 434 | 37.250 | 18.000 | 7.77 | 5.66 | 9.88  | 58.69 | 146.72 |
| 435 | 37.500 | 18.000 | 9.25 | 6.19 | 12.31 | 47.10 | 117.76 |
| 436 | 37.750 | 18.000 | 8.09 | 5.70 | 10.48 | 55.33 | 138.32 |
| 437 | 38.000 | 18.000 | 8.31 | 5.80 | 10.82 | 53.59 | 133.97 |
| 438 | 38.250 | 18.000 | 7.88 | 5.35 | 10.41 | 55.70 | 139.25 |
| 439 | 38.500 | 18.000 | 6.07 | 5.15 | 6.99  | 82.94 | 207.35 |
| 440 | 38.750 | 18.000 | 7.10 | 6.01 | 8.19  | 70.79 | 176.98 |
| 441 | 39.000 | 18.000 | 5.95 | 5.89 | 6.01  | 96.46 | 241.14 |
| 442 | 39.250 | 18.000 | 6.16 | 5.07 | 7.25  | 79.97 | 199.92 |
| 443 | 39.500 | 18.000 | 6.91 | 5.80 | 8.02  | 72.29 | 180.73 |
| 444 | 39.750 | 18.000 | 5.57 | 4.69 | 6.45  | 89.88 | 224.70 |
| 445 | 40.000 | 18.000 | 6.36 | 5.40 | 7.32  | 79.20 | 198.01 |
| 446 | 40.250 | 18.000 | 5.71 | 4.21 | 7.21  | 80.41 | 201.03 |
| 447 | 40.500 | 18.000 | 6.19 | 5.34 | 7.04  | 82.35 | 205.88 |
| 448 | 40.750 | 18.000 | 7.33 | 5.39 | 9.27  | 62.55 | 156.37 |
| 449 | 41.000 | 18.000 | 9.43 | 4.88 | 13.98 | 41.48 | 103.70 |
| 450 | 41.250 | 18.000 | 6.41 | 5.65 | 7.17  | 80.86 | 202.15 |
| 451 | 41.500 | 18.000 | 6.36 | 6.63 | 6.09  | 95.19 | 237.98 |
| 452 | 41.750 | 18.000 | 6.63 | 4.69 | 8.57  | 67.65 | 169.14 |
| 453 | 42.000 | 18.000 | 7.46 | 4.33 | 10.59 | 54.75 | 136.88 |
| 454 | 42.250 | 18.000 | 7.20 | 5.14 | 9.26  | 62.61 | 156.54 |
| 455 | 42.500 | 18.000 | 8.92 | 3.61 | 14.23 | 40.75 | 101.88 |
| 456 | 42.750 | 18.000 | 5.38 | 2.41 | 8.35  | 69.44 | 173.59 |
| 457 | 43.000 | 18.000 | 8.44 | 3.23 | 13.65 | 42.48 | 106.20 |
| 458 | 43.250 | 18.000 | 6.38 | 3.57 | 9.19  | 63.09 | 157.73 |
| 459 | 43.500 | 18.000 | 7.42 | 3.73 | 11.11 | 52.19 | 130.48 |
| 460 | 43.750 | 18.000 | 5.63 | 3.44 | 7.82  | 74.14 | 185.35 |
| 461 | 44.000 | 18.000 | 5.43 | 3.26 | 7.60  | 76.29 | 190.71 |
| 462 | 44.250 | 18.000 | 6.53 | 4.74 | 8.32  | 69.69 | 174.22 |
| 463 | 44.500 | 18.000 | 7.46 | 5.23 | 9.69  | 59.84 | 149.59 |
| 464 | 44.750 | 18.000 | 6.47 | 2.89 | 10.05 | 57.69 | 144.24 |
| 465 | 45.000 | 18.000 | 5.58 | 3.23 | 7.93  | 73.11 | 182.78 |
| 466 | 45.250 | 18.000 | 6.24 | 5.91 | 6.57  | 88.24 | 220.60 |
| 467 | 45.500 | 18.000 | 6.54 | 5.64 | 7.44  | 77.93 | 194.81 |
| 468 | 45.750 | 18.000 | 6.45 | 5.48 | 7.42  | 78.14 | 195.34 |
| 469 | 46.000 | 18.000 | 6.38 | 5.42 | 7.34  | 78.99 | 197.47 |

|     |        |        |      |      |       |       |        |
|-----|--------|--------|------|------|-------|-------|--------|
| 470 | 46.250 | 18.000 | 6.07 | 3.53 | 8.61  | 67.34 | 168.35 |
| 471 | 46.500 | 18.000 | 6.19 | 3.34 | 9.04  | 64.14 | 160.35 |
| 472 | 46.750 | 18.000 | 7.99 | 3.47 | 12.51 | 46.35 | 115.88 |
| 473 | 47.000 | 18.000 | 7.98 | 3.83 | 12.13 | 47.80 | 119.51 |
| 474 | 47.250 | 18.000 | 6.40 | 3.54 | 9.26  | 62.61 | 156.54 |
| 475 | 47.500 | 18.000 | 8.51 | 4.48 | 12.54 | 46.24 | 115.60 |
| 476 | 47.750 | 18.000 | 5.89 | 3.92 | 7.86  | 73.76 | 184.41 |
| 477 | 48.000 | 18.000 | 8.16 | 5.45 | 10.87 | 53.34 | 133.36 |
| 478 | 35.000 | 18.250 | 7.05 | 4.64 | 9.46  | 61.29 | 153.23 |
| 479 | 35.250 | 18.250 | 8.21 | 6.52 | 9.90  | 58.57 | 146.42 |
| 480 | 35.500 | 18.250 | 7.50 | 4.43 | 10.57 | 54.86 | 137.14 |
| 481 | 35.750 | 18.250 | 6.49 | 4.71 | 8.27  | 70.11 | 175.27 |
| 482 | 36.000 | 18.250 | 6.70 | 4.44 | 8.96  | 64.71 | 161.78 |
| 483 | 36.250 | 18.250 | 6.16 | 4.13 | 8.19  | 70.79 | 176.98 |
| 484 | 36.500 | 18.250 | 9.20 | 5.07 | 13.33 | 43.50 | 108.75 |
| 485 | 36.750 | 18.250 | 7.47 | 3.42 | 11.52 | 50.33 | 125.84 |
| 486 | 37.000 | 18.250 | 8.50 | 3.53 | 13.47 | 43.05 | 107.62 |
| 487 | 37.250 | 18.250 | 6.75 | 3.53 | 9.97  | 58.16 | 145.39 |
| 488 | 37.500 | 18.250 | 5.36 | 3.37 | 7.35  | 78.88 | 197.20 |
| 489 | 37.750 | 18.250 | 5.77 | 4.29 | 7.25  | 79.97 | 199.92 |
| 490 | 38.000 | 18.250 | 5.62 | 3.48 | 7.76  | 74.71 | 186.78 |
| 491 | 38.250 | 18.250 | 5.54 | 3.89 | 7.19  | 80.63 | 201.58 |
| 492 | 38.500 | 18.250 | 6.19 | 3.61 | 8.77  | 66.11 | 165.28 |
| 493 | 38.750 | 18.250 | 4.98 | 2.83 | 7.13  | 81.31 | 203.28 |
| 494 | 39.000 | 18.250 | 6.01 | 3.46 | 8.56  | 67.73 | 169.33 |
| 495 | 39.250 | 18.250 | 5.95 | 4.29 | 7.61  | 76.19 | 190.46 |
| 496 | 39.500 | 18.250 | 5.36 | 3.95 | 6.77  | 85.63 | 214.09 |
| 497 | 39.750 | 18.250 | 6.34 | 3.99 | 8.69  | 66.72 | 166.80 |
| 498 | 40.000 | 18.250 | 6.53 | 4.23 | 8.83  | 65.66 | 164.16 |
| 499 | 40.250 | 18.250 | 7.58 | 3.93 | 11.23 | 51.63 | 129.08 |
| 500 | 40.500 | 18.250 | 5.86 | 3.68 | 8.04  | 72.11 | 180.28 |
| 501 | 40.750 | 18.250 | 6.53 | 3.11 | 9.95  | 58.27 | 145.68 |
| 502 | 41.000 | 18.250 | 7.31 | 4.29 | 10.33 | 56.13 | 140.33 |
| 503 | 41.250 | 18.250 | 5.62 | 3.85 | 7.39  | 78.45 | 196.13 |
| 504 | 41.500 | 18.250 | 6.18 | 5.04 | 7.32  | 79.20 | 198.01 |
| 505 | 41.750 | 18.250 | 5.55 | 4.65 | 6.45  | 89.88 | 224.70 |
| 506 | 42.000 | 18.250 | 7.21 | 4.40 | 10.02 | 57.87 | 144.67 |
| 507 | 42.250 | 18.250 | 6.79 | 4.59 | 8.99  | 64.49 | 161.24 |
| 508 | 42.500 | 18.250 | 6.70 | 3.83 | 9.57  | 60.59 | 151.47 |
| 509 | 42.750 | 18.250 | 6.04 | 3.46 | 8.62  | 67.26 | 168.15 |
| 510 | 43.000 | 18.250 | 6.00 | 3.27 | 8.73  | 66.41 | 166.04 |
| 511 | 43.250 | 18.250 | 6.09 | 3.47 | 8.71  | 66.57 | 166.42 |
| 512 | 43.500 | 18.250 | 6.16 | 3.66 | 8.66  | 66.95 | 167.38 |
| 513 | 43.750 | 18.250 | 6.28 | 3.48 | 9.08  | 63.86 | 159.64 |
| 514 | 44.000 | 18.250 | 5.56 | 3.30 | 7.82  | 74.14 | 185.35 |
| 515 | 44.250 | 18.250 | 6.13 | 3.22 | 9.04  | 64.14 | 160.35 |
| 516 | 44.500 | 18.250 | 6.75 | 2.57 | 10.93 | 53.05 | 132.63 |
| 517 | 44.750 | 18.250 | 5.52 | 3.57 | 7.47  | 77.61 | 194.03 |
| 518 | 45.000 | 18.250 | 6.61 | 3.97 | 9.25  | 62.68 | 156.71 |
| 519 | 45.250 | 18.250 | 6.99 | 4.32 | 9.66  | 60.02 | 150.06 |
| 520 | 45.500 | 18.250 | 5.66 | 3.28 | 8.04  | 72.11 | 180.28 |
| 521 | 45.750 | 18.250 | 5.84 | 3.41 | 8.27  | 70.11 | 175.27 |
| 522 | 46.000 | 18.250 | 5.51 | 3.57 | 7.45  | 77.82 | 194.55 |

|     |        |        |      |      |       |        |        |
|-----|--------|--------|------|------|-------|--------|--------|
| 523 | 46.250 | 18.250 | 6.09 | 2.97 | 9.21  | 62.95  | 157.39 |
| 524 | 46.500 | 18.250 | 5.69 | 4.47 | 6.91  | 83.90  | 209.75 |
| 525 | 46.750 | 18.250 | 5.54 | 3.53 | 7.55  | 76.79  | 191.98 |
| 526 | 47.000 | 18.250 | 5.60 | 3.76 | 7.44  | 77.93  | 194.81 |
| 527 | 47.250 | 18.250 | 6.61 | 3.10 | 10.12 | 57.30  | 143.24 |
| 528 | 47.500 | 18.250 | 5.63 | 3.31 | 7.95  | 72.93  | 182.32 |
| 529 | 47.750 | 18.250 | 6.11 | 3.09 | 9.13  | 63.51  | 158.76 |
| 530 | 48.000 | 18.250 | 7.08 | 3.63 | 10.53 | 55.07  | 137.66 |
| 531 | 35.000 | 18.500 | 7.39 | 3.28 | 11.50 | 50.42  | 126.05 |
| 532 | 35.250 | 18.500 | 7.26 | 3.90 | 10.62 | 54.60  | 136.50 |
| 533 | 35.500 | 18.500 | 6.29 | 4.67 | 7.91  | 73.30  | 183.24 |
| 534 | 35.750 | 18.500 | 5.84 | 2.59 | 9.09  | 63.79  | 159.46 |
| 535 | 36.000 | 18.500 | 6.35 | 3.20 | 9.50  | 61.03  | 152.58 |
| 536 | 36.250 | 18.500 | 7.02 | 2.66 | 11.38 | 50.95  | 127.38 |
| 537 | 36.500 | 18.500 | 6.01 | 5.72 | 6.30  | 92.02  | 230.05 |
| 538 | 36.750 | 18.500 | 5.11 | 4.77 | 5.45  | 106.36 | 265.91 |
| 539 | 37.000 | 18.500 | 5.48 | 5.08 | 5.88  | 98.59  | 246.47 |
| 540 | 37.250 | 18.500 | 5.38 | 4.76 | 6.00  | 96.62  | 241.55 |
| 541 | 37.500 | 18.500 | 5.46 | 4.19 | 6.73  | 86.14  | 215.36 |
| 542 | 37.750 | 18.500 | 6.87 | 3.61 | 10.13 | 57.24  | 143.10 |
| 543 | 38.000 | 18.500 | 6.08 | 5.39 | 6.77  | 85.63  | 214.09 |
| 544 | 38.250 | 18.500 | 5.55 | 5.18 | 5.92  | 97.92  | 244.81 |
| 545 | 38.500 | 18.500 | 5.34 | 4.17 | 6.51  | 89.05  | 222.63 |
| 546 | 38.750 | 18.500 | 5.40 | 5.37 | 5.43  | 106.76 | 266.89 |
| 547 | 39.000 | 18.500 | 6.20 | 5.62 | 6.78  | 85.51  | 213.77 |
| 548 | 39.250 | 18.500 | 5.73 | 4.06 | 7.40  | 78.35  | 195.87 |
| 549 | 39.500 | 18.500 | 5.79 | 3.64 | 7.94  | 73.02  | 182.55 |
| 550 | 39.750 | 18.500 | 6.11 | 4.04 | 8.18  | 70.88  | 177.20 |
| 551 | 40.000 | 18.500 | 6.85 | 4.89 | 8.81  | 65.81  | 164.53 |
| 552 | 40.250 | 18.500 | 6.01 | 4.27 | 7.75  | 74.81  | 187.02 |
| 553 | 40.500 | 18.500 | 6.57 | 3.69 | 9.45  | 61.36  | 153.39 |
| 554 | 40.750 | 18.500 | 5.98 | 3.58 | 8.38  | 69.19  | 172.97 |
| 555 | 41.000 | 18.500 | 6.11 | 3.66 | 8.56  | 67.73  | 169.33 |
| 556 | 41.250 | 18.500 | 6.13 | 3.93 | 8.33  | 69.60  | 174.01 |
| 557 | 41.500 | 18.500 | 6.28 | 3.73 | 8.83  | 65.66  | 164.16 |
| 558 | 41.750 | 18.500 | 6.10 | 4.31 | 7.89  | 73.48  | 183.71 |
| 559 | 42.000 | 18.500 | 6.00 | 3.19 | 8.81  | 65.81  | 164.53 |
| 560 | 42.250 | 18.500 | 6.43 | 3.22 | 9.64  | 60.15  | 150.37 |
| 561 | 42.500 | 18.500 | 6.48 | 4.30 | 8.66  | 66.95  | 167.38 |
| 562 | 42.750 | 18.500 | 6.21 | 3.74 | 8.68  | 66.80  | 166.99 |
| 563 | 43.000 | 18.500 | 5.86 | 4.02 | 7.70  | 75.30  | 188.24 |
| 564 | 43.250 | 18.500 | 7.09 | 5.36 | 8.82  | 65.74  | 164.34 |
| 565 | 43.500 | 18.500 | 6.69 | 4.87 | 8.51  | 68.13  | 170.33 |
| 566 | 43.750 | 18.500 | 5.10 | 3.11 | 7.09  | 81.77  | 204.43 |
| 567 | 44.000 | 18.500 | 5.72 | 3.69 | 7.75  | 74.81  | 187.02 |
| 568 | 44.250 | 18.500 | 5.46 | 3.65 | 7.27  | 79.75  | 199.37 |
| 569 | 44.500 | 18.500 | 6.22 | 4.07 | 8.37  | 69.27  | 173.18 |
| 570 | 44.750 | 18.500 | 6.77 | 4.71 | 8.83  | 65.66  | 164.16 |
| 571 | 45.000 | 18.500 | 8.82 | 6.32 | 11.32 | 51.22  | 128.06 |
| 572 | 45.250 | 18.500 | 7.28 | 4.69 | 9.87  | 58.75  | 146.87 |
| 573 | 45.500 | 18.500 | 7.81 | 5.19 | 10.43 | 55.59  | 138.98 |
| 574 | 45.750 | 18.500 | 8.64 | 5.60 | 11.68 | 49.64  | 124.11 |
| 575 | 46.000 | 18.500 | 8.37 | 5.82 | 10.92 | 53.10  | 132.75 |

|     |        |        |       |      |       |       |        |
|-----|--------|--------|-------|------|-------|-------|--------|
| 576 | 46.250 | 18.500 | 8.74  | 5.34 | 12.14 | 47.76 | 119.41 |
| 577 | 46.500 | 18.500 | 8.07  | 6.12 | 10.02 | 57.87 | 144.67 |
| 578 | 46.750 | 18.500 | 7.19  | 5.15 | 9.23  | 62.82 | 157.05 |
| 579 | 47.000 | 18.500 | 8.19  | 7.10 | 9.28  | 62.48 | 156.20 |
| 580 | 47.250 | 18.500 | 8.64  | 7.44 | 9.84  | 58.93 | 147.31 |
| 581 | 47.500 | 18.500 | 8.30  | 6.61 | 9.99  | 58.04 | 145.10 |
| 582 | 47.750 | 18.500 | 7.97  | 5.60 | 10.34 | 56.08 | 140.19 |
| 583 | 48.000 | 18.500 | 7.84  | 4.31 | 11.37 | 51.00 | 127.49 |
| 584 | 35.000 | 18.750 | 7.91  | 5.00 | 10.82 | 53.59 | 133.97 |
| 585 | 35.250 | 18.750 | 8.84  | 7.13 | 10.55 | 54.96 | 137.40 |
| 586 | 35.500 | 18.750 | 9.79  | 6.28 | 13.30 | 43.60 | 109.00 |
| 587 | 35.750 | 18.750 | 9.47  | 6.21 | 12.73 | 45.55 | 113.88 |
| 588 | 36.000 | 18.750 | 9.58  | 5.17 | 13.99 | 41.45 | 103.62 |
| 589 | 36.250 | 18.750 | 7.83  | 4.99 | 10.67 | 54.34 | 135.86 |
| 590 | 36.500 | 18.750 | 8.85  | 7.44 | 10.26 | 56.51 | 141.28 |
| 591 | 36.750 | 18.750 | 8.33  | 5.59 | 11.07 | 52.38 | 130.95 |
| 592 | 37.000 | 18.750 | 8.03  | 5.94 | 10.12 | 57.30 | 143.24 |
| 593 | 37.250 | 18.750 | 10.98 | 5.39 | 16.57 | 35.00 | 87.49  |
| 594 | 37.500 | 18.750 | 10.25 | 5.98 | 14.52 | 39.94 | 99.84  |
| 595 | 37.750 | 18.750 | 10.66 | 5.08 | 16.24 | 35.71 | 89.27  |
| 596 | 38.000 | 18.750 | 8.87  | 5.98 | 11.76 | 49.31 | 123.27 |
| 597 | 38.250 | 18.750 | 8.08  | 4.49 | 11.67 | 49.69 | 124.22 |
| 598 | 38.500 | 18.750 | 7.79  | 4.87 | 10.71 | 54.14 | 135.35 |
| 599 | 38.750 | 18.750 | 8.56  | 5.04 | 12.08 | 48.00 | 120.00 |
| 600 | 39.000 | 18.750 | 8.06  | 6.50 | 9.62  | 60.27 | 150.68 |
| 601 | 39.250 | 18.750 | 8.87  | 6.05 | 11.69 | 49.60 | 124.01 |
| 602 | 39.500 | 18.750 | 9.00  | 6.45 | 11.55 | 50.20 | 125.51 |
| 603 | 39.750 | 18.750 | 7.41  | 6.36 | 8.46  | 68.53 | 171.33 |
| 604 | 40.000 | 18.750 | 8.38  | 5.66 | 11.10 | 52.24 | 130.60 |
| 605 | 40.250 | 18.750 | 7.02  | 5.81 | 8.23  | 70.45 | 176.12 |
| 606 | 40.500 | 18.750 | 9.71  | 3.81 | 15.61 | 37.15 | 92.87  |
| 607 | 40.750 | 18.750 | 6.54  | 5.86 | 7.22  | 80.30 | 200.75 |
| 608 | 41.000 | 18.750 | 6.86  | 5.62 | 8.10  | 71.58 | 178.95 |
| 609 | 41.250 | 18.750 | 7.13  | 5.76 | 8.50  | 68.21 | 170.53 |
| 610 | 41.500 | 18.750 | 7.15  | 5.28 | 9.02  | 64.28 | 160.70 |
| 611 | 41.750 | 18.750 | 5.93  | 4.73 | 7.13  | 81.31 | 203.28 |
| 612 | 42.000 | 18.750 | 6.54  | 5.07 | 8.01  | 72.38 | 180.96 |
| 613 | 42.250 | 18.750 | 6.86  | 6.01 | 7.71  | 75.20 | 187.99 |
| 614 | 42.500 | 18.750 | 8.21  | 6.65 | 9.77  | 59.35 | 148.37 |
| 615 | 42.750 | 18.750 | 7.46  | 4.01 | 10.91 | 53.15 | 132.87 |
| 616 | 43.000 | 18.750 | 6.99  | 4.29 | 9.69  | 59.84 | 149.59 |
| 617 | 43.250 | 18.750 | 6.42  | 4.45 | 8.39  | 69.11 | 172.76 |
| 618 | 43.500 | 18.750 | 6.57  | 5.42 | 7.72  | 75.10 | 187.75 |
| 619 | 43.750 | 18.750 | 6.94  | 4.94 | 8.94  | 64.86 | 162.14 |
| 620 | 44.000 | 18.750 | 6.27  | 5.72 | 6.82  | 85.01 | 212.52 |
| 621 | 44.250 | 18.750 | 5.39  | 4.75 | 6.03  | 96.14 | 240.34 |
| 622 | 44.500 | 18.750 | 6.39  | 6.70 | 6.08  | 95.35 | 238.37 |
| 623 | 44.750 | 18.750 | 6.84  | 7.04 | 6.64  | 87.31 | 218.27 |
| 624 | 45.000 | 18.750 | 6.50  | 6.21 | 6.79  | 85.38 | 213.46 |
| 625 | 45.250 | 18.750 | 6.17  | 5.20 | 7.14  | 81.20 | 203.00 |
| 626 | 45.500 | 18.750 | 6.04  | 3.91 | 8.17  | 70.97 | 177.41 |
| 627 | 45.750 | 18.750 | 6.70  | 5.66 | 7.74  | 74.91 | 187.27 |
| 628 | 46.000 | 18.750 | 8.48  | 5.35 | 11.61 | 49.94 | 124.86 |

|     |        |        |      |      |       |        |        |
|-----|--------|--------|------|------|-------|--------|--------|
| 629 | 46.250 | 18.750 | 8.08 | 5.06 | 11.10 | 52.24  | 130.60 |
| 630 | 46.500 | 18.750 | 7.20 | 5.13 | 9.27  | 62.55  | 156.37 |
| 631 | 46.750 | 18.750 | 9.48 | 6.55 | 12.41 | 46.73  | 116.81 |
| 632 | 47.000 | 18.750 | 6.57 | 5.28 | 7.86  | 73.76  | 184.41 |
| 633 | 47.250 | 18.750 | 8.73 | 6.99 | 10.47 | 55.38  | 138.45 |
| 634 | 47.500 | 18.750 | 7.04 | 6.83 | 7.25  | 79.97  | 199.92 |
| 635 | 47.750 | 18.750 | 8.03 | 7.51 | 8.55  | 67.81  | 169.53 |
| 636 | 48.000 | 18.750 | 8.81 | 5.81 | 11.81 | 49.10  | 122.75 |
| 637 | 35.000 | 19.000 | 7.99 | 5.88 | 10.10 | 57.41  | 143.52 |
| 638 | 35.250 | 19.000 | 7.67 | 5.81 | 9.53  | 60.84  | 152.10 |
| 639 | 35.500 | 19.000 | 7.78 | 4.77 | 10.79 | 53.74  | 134.35 |
| 640 | 35.750 | 19.000 | 6.03 | 4.59 | 7.47  | 77.61  | 194.03 |
| 641 | 36.000 | 19.000 | 7.05 | 7.04 | 7.06  | 82.12  | 205.30 |
| 642 | 36.250 | 19.000 | 6.53 | 5.19 | 7.87  | 73.67  | 184.17 |
| 643 | 36.500 | 19.000 | 6.68 | 5.26 | 8.10  | 71.58  | 178.95 |
| 644 | 36.750 | 19.000 | 5.35 | 4.96 | 5.74  | 100.99 | 252.48 |
| 645 | 37.000 | 19.000 | 6.97 | 6.01 | 7.93  | 73.11  | 182.78 |
| 646 | 37.250 | 19.000 | 5.62 | 5.24 | 6.00  | 96.62  | 241.55 |
| 647 | 37.500 | 19.000 | 6.06 | 5.30 | 6.82  | 85.01  | 212.52 |
| 648 | 37.750 | 19.000 | 6.28 | 4.09 | 8.47  | 68.45  | 171.13 |
| 649 | 38.000 | 19.000 | 5.99 | 4.47 | 7.51  | 77.20  | 193.00 |
| 650 | 38.250 | 19.000 | 6.76 | 4.64 | 8.88  | 65.29  | 163.23 |
| 651 | 38.500 | 19.000 | 6.26 | 6.10 | 6.42  | 90.30  | 225.75 |
| 652 | 38.750 | 19.000 | 6.38 | 6.27 | 6.49  | 89.33  | 223.32 |
| 653 | 39.000 | 19.000 | 5.86 | 4.95 | 6.77  | 85.66  | 214.15 |
| 654 | 39.250 | 19.000 | 6.43 | 6.35 | 6.51  | 89.05  | 222.63 |
| 655 | 39.500 | 19.000 | 6.40 | 5.91 | 6.89  | 84.14  | 210.36 |
| 656 | 39.750 | 19.000 | 6.11 | 5.25 | 6.97  | 83.18  | 207.94 |
| 657 | 40.000 | 19.000 | 6.43 | 5.77 | 7.09  | 81.78  | 204.46 |
| 658 | 40.250 | 19.000 | 6.05 | 5.39 | 6.71  | 86.40  | 216.00 |
| 659 | 40.500 | 19.000 | 6.77 | 5.70 | 7.84  | 73.95  | 184.88 |
| 660 | 40.750 | 19.000 | 7.07 | 5.65 | 8.49  | 68.29  | 170.73 |
| 661 | 41.000 | 19.000 | 7.20 | 6.05 | 8.35  | 69.44  | 173.59 |
| 662 | 41.250 | 19.000 | 6.50 | 4.36 | 8.64  | 67.11  | 167.77 |
| 663 | 41.500 | 19.000 | 5.77 | 5.35 | 6.19  | 93.65  | 234.14 |
| 664 | 41.750 | 19.000 | 6.66 | 5.14 | 8.18  | 70.88  | 177.20 |
| 665 | 42.000 | 19.000 | 6.36 | 6.06 | 6.66  | 87.05  | 217.62 |
| 666 | 42.250 | 19.000 | 6.82 | 6.02 | 7.62  | 76.09  | 190.21 |
| 667 | 42.500 | 19.000 | 6.13 | 5.65 | 6.61  | 87.71  | 219.27 |
| 668 | 42.750 | 19.000 | 6.82 | 5.67 | 7.97  | 72.75  | 181.86 |
| 669 | 43.000 | 19.000 | 6.37 | 6.27 | 6.47  | 89.60  | 224.01 |
| 670 | 43.250 | 19.000 | 5.93 | 5.48 | 6.38  | 90.87  | 227.17 |
| 671 | 43.500 | 19.000 | 5.86 | 5.46 | 6.26  | 92.61  | 231.52 |
| 672 | 43.750 | 19.000 | 5.57 | 4.89 | 6.25  | 92.76  | 231.89 |
| 673 | 44.000 | 19.000 | 5.71 | 5.18 | 6.24  | 92.90  | 232.26 |
| 674 | 44.250 | 19.000 | 5.41 | 5.38 | 5.44  | 106.56 | 266.40 |
| 675 | 44.500 | 19.000 | 5.87 | 5.68 | 6.06  | 95.66  | 239.16 |
| 676 | 44.750 | 19.000 | 6.37 | 5.68 | 7.06  | 82.12  | 205.30 |
| 677 | 45.000 | 19.000 | 6.17 | 5.18 | 7.16  | 80.97  | 202.43 |
| 678 | 45.250 | 19.000 | 6.28 | 5.84 | 6.72  | 86.27  | 215.68 |
| 679 | 45.500 | 19.000 | 6.03 | 5.50 | 6.56  | 88.37  | 220.94 |
| 680 | 45.750 | 19.000 | 6.57 | 5.39 | 7.75  | 74.81  | 187.02 |
| 681 | 46.000 | 19.000 | 6.46 | 4.25 | 8.67  | 66.87  | 167.19 |

|     |        |        |      |      |       |       |        |
|-----|--------|--------|------|------|-------|-------|--------|
| 682 | 46.250 | 19.000 | 6.88 | 5.18 | 8.58  | 67.58 | 168.94 |
| 683 | 46.500 | 19.000 | 6.99 | 5.19 | 8.79  | 65.96 | 164.90 |
| 684 | 46.750 | 19.000 | 6.49 | 4.70 | 8.28  | 70.02 | 175.06 |
| 685 | 47.000 | 19.000 | 7.47 | 5.96 | 8.98  | 64.57 | 161.42 |
| 686 | 47.250 | 19.000 | 5.98 | 5.03 | 6.93  | 83.66 | 209.14 |
| 687 | 47.500 | 19.000 | 5.79 | 4.66 | 6.92  | 83.78 | 209.45 |
| 688 | 47.750 | 19.000 | 5.60 | 5.05 | 6.15  | 94.26 | 235.66 |
| 689 | 48.000 | 19.000 | 5.74 | 5.32 | 6.16  | 94.11 | 235.28 |
| 690 | 35.000 | 19.250 | 7.88 | 4.75 | 11.01 | 52.67 | 131.66 |
| 691 | 35.250 | 19.250 | 6.84 | 6.69 | 6.99  | 82.94 | 207.35 |
| 692 | 35.500 | 19.250 | 6.64 | 6.09 | 7.19  | 80.63 | 201.58 |
| 693 | 35.750 | 19.250 | 6.88 | 4.19 | 9.57  | 60.59 | 151.47 |
| 694 | 36.000 | 19.250 | 7.26 | 4.76 | 9.76  | 59.41 | 148.52 |
| 695 | 36.250 | 19.250 | 6.32 | 5.09 | 7.55  | 76.79 | 191.98 |
| 696 | 36.500 | 19.250 | 5.72 | 5.06 | 6.38  | 90.87 | 227.17 |
| 697 | 36.750 | 19.250 | 6.75 | 4.57 | 8.93  | 64.93 | 162.32 |
| 698 | 37.000 | 19.250 | 6.29 | 5.39 | 7.19  | 80.63 | 201.58 |
| 699 | 37.250 | 19.250 | 6.17 | 5.81 | 6.53  | 88.78 | 221.95 |
| 700 | 37.500 | 19.250 | 7.52 | 4.40 | 10.64 | 54.50 | 136.24 |
| 701 | 37.750 | 19.250 | 6.57 | 4.41 | 8.73  | 66.41 | 166.04 |
| 702 | 38.000 | 19.250 | 5.96 | 4.02 | 7.90  | 73.39 | 183.47 |
| 703 | 38.250 | 19.250 | 5.84 | 4.96 | 6.72  | 86.27 | 215.68 |
| 704 | 38.500 | 19.250 | 6.07 | 5.33 | 6.81  | 85.13 | 212.83 |
| 705 | 38.750 | 19.250 | 6.28 | 5.66 | 6.90  | 84.02 | 210.05 |
| 706 | 39.000 | 19.250 | 6.30 | 5.99 | 6.61  | 87.71 | 219.27 |
| 707 | 39.250 | 19.250 | 6.69 | 4.76 | 8.62  | 67.26 | 168.15 |
| 708 | 39.500 | 19.250 | 6.15 | 5.53 | 6.77  | 85.63 | 214.09 |
| 709 | 39.750 | 19.250 | 5.89 | 4.97 | 6.81  | 85.13 | 212.83 |
| 710 | 40.000 | 19.250 | 6.72 | 5.90 | 7.54  | 76.89 | 192.23 |
| 711 | 40.250 | 19.250 | 6.30 | 5.72 | 6.88  | 84.27 | 210.66 |
| 712 | 40.500 | 19.250 | 6.67 | 6.19 | 7.15  | 81.08 | 202.71 |
| 713 | 40.750 | 19.250 | 7.06 | 5.98 | 8.14  | 71.23 | 178.07 |
| 714 | 41.000 | 19.250 | 7.27 | 5.52 | 9.02  | 64.28 | 160.70 |
| 715 | 41.250 | 19.250 | 5.88 | 5.35 | 6.41  | 90.44 | 226.10 |
| 716 | 41.500 | 19.250 | 7.20 | 5.15 | 9.25  | 62.68 | 156.71 |
| 717 | 41.750 | 19.250 | 6.78 | 6.01 | 7.55  | 76.79 | 191.98 |
| 718 | 42.000 | 19.250 | 6.73 | 4.21 | 9.25  | 62.68 | 156.71 |
| 719 | 42.250 | 19.250 | 6.92 | 5.34 | 8.50  | 68.21 | 170.53 |
| 720 | 42.500 | 19.250 | 6.59 | 5.39 | 7.79  | 74.43 | 186.06 |
| 721 | 42.750 | 19.250 | 6.45 | 4.88 | 8.02  | 72.29 | 180.73 |
| 722 | 43.000 | 19.250 | 6.30 | 5.65 | 6.95  | 83.42 | 208.54 |
| 723 | 43.250 | 19.250 | 6.41 | 6.63 | 6.19  | 93.65 | 234.14 |
| 724 | 43.500 | 19.250 | 6.69 | 5.45 | 7.93  | 73.11 | 182.78 |
| 725 | 43.750 | 19.250 | 6.76 | 5.26 | 8.26  | 70.19 | 175.48 |
| 726 | 44.000 | 19.250 | 6.83 | 4.99 | 8.67  | 66.87 | 167.19 |
| 727 | 44.250 | 19.250 | 6.81 | 4.84 | 8.78  | 66.04 | 165.09 |
| 728 | 44.500 | 19.250 | 7.63 | 5.31 | 9.95  | 58.27 | 145.68 |
| 729 | 44.750 | 19.250 | 7.29 | 4.83 | 9.75  | 59.47 | 148.67 |
| 730 | 45.000 | 19.250 | 6.26 | 4.94 | 7.58  | 76.49 | 191.22 |
| 731 | 45.250 | 19.250 | 6.14 | 4.52 | 7.76  | 74.71 | 186.78 |
| 732 | 45.500 | 19.250 | 6.62 | 4.44 | 8.80  | 65.89 | 164.72 |
| 733 | 45.750 | 19.250 | 7.07 | 5.29 | 8.85  | 65.51 | 163.79 |
| 734 | 46.000 | 19.250 | 7.22 | 5.66 | 8.78  | 66.04 | 165.09 |

|     |        |        |      |      |       |       |        |
|-----|--------|--------|------|------|-------|-------|--------|
| 735 | 46.250 | 19.250 | 9.12 | 5.29 | 12.95 | 44.78 | 111.94 |
| 736 | 46.500 | 19.250 | 7.56 | 6.39 | 8.73  | 66.41 | 166.04 |
| 737 | 46.750 | 19.250 | 8.66 | 5.54 | 11.78 | 49.22 | 123.06 |
| 738 | 47.000 | 19.250 | 9.71 | 5.40 | 14.02 | 41.36 | 103.40 |
| 739 | 47.250 | 19.250 | 6.54 | 5.06 | 8.02  | 72.29 | 180.73 |
| 740 | 47.500 | 19.250 | 8.86 | 4.81 | 12.91 | 44.92 | 112.29 |
| 741 | 47.750 | 19.250 | 7.13 | 5.39 | 8.87  | 65.37 | 163.42 |
| 742 | 48.000 | 19.250 | 8.15 | 5.66 | 10.64 | 54.50 | 136.24 |
| 743 | 35.000 | 19.500 | 8.48 | 4.52 | 12.44 | 46.61 | 116.53 |
| 744 | 35.250 | 19.500 | 8.08 | 4.44 | 11.72 | 49.48 | 123.69 |
| 745 | 35.500 | 19.500 | 8.73 | 6.39 | 11.07 | 52.38 | 130.95 |
| 746 | 35.750 | 19.500 | 7.04 | 5.54 | 8.54  | 67.89 | 169.73 |
| 747 | 36.000 | 19.500 | 8.03 | 5.40 | 10.66 | 54.39 | 135.98 |
| 748 | 36.250 | 19.500 | 8.81 | 5.06 | 12.56 | 46.17 | 115.42 |
| 749 | 36.500 | 19.500 | 6.24 | 4.81 | 7.67  | 75.59 | 188.97 |
| 750 | 36.750 | 19.500 | 7.88 | 5.39 | 10.37 | 55.91 | 139.79 |
| 751 | 37.000 | 19.500 | 7.77 | 5.66 | 9.88  | 58.69 | 146.72 |
| 752 | 37.250 | 19.500 | 9.25 | 6.19 | 12.31 | 47.10 | 117.76 |
| 753 | 37.500 | 19.500 | 8.09 | 5.70 | 10.48 | 55.33 | 138.32 |
| 754 | 37.750 | 19.500 | 8.31 | 5.80 | 10.82 | 53.59 | 133.97 |
| 755 | 38.000 | 19.500 | 7.88 | 5.35 | 10.41 | 55.70 | 139.25 |
| 756 | 38.250 | 19.500 | 6.07 | 5.15 | 6.99  | 82.94 | 207.35 |
| 757 | 38.500 | 19.500 | 7.10 | 6.01 | 8.19  | 70.79 | 176.98 |
| 758 | 38.750 | 19.500 | 5.95 | 5.89 | 6.01  | 96.46 | 241.14 |
| 759 | 39.000 | 19.500 | 6.16 | 5.07 | 7.25  | 79.97 | 199.92 |
| 760 | 39.250 | 19.500 | 6.91 | 5.80 | 8.02  | 72.29 | 180.73 |
| 761 | 39.500 | 19.500 | 5.57 | 4.69 | 6.45  | 89.88 | 224.70 |
| 762 | 39.750 | 19.500 | 6.36 | 5.40 | 7.32  | 79.20 | 198.01 |
| 763 | 40.000 | 19.500 | 5.71 | 4.21 | 7.21  | 80.41 | 201.03 |
| 764 | 40.250 | 19.500 | 6.19 | 5.34 | 7.04  | 82.35 | 205.88 |
| 765 | 40.500 | 19.500 | 7.33 | 5.39 | 9.27  | 62.55 | 156.37 |
| 766 | 40.750 | 19.500 | 9.43 | 4.88 | 13.98 | 41.48 | 103.70 |
| 767 | 41.000 | 19.500 | 6.41 | 5.65 | 7.17  | 80.86 | 202.15 |
| 768 | 41.250 | 19.500 | 6.36 | 6.63 | 6.09  | 95.19 | 237.98 |
| 769 | 41.500 | 19.500 | 6.63 | 4.69 | 8.57  | 67.65 | 169.14 |
| 770 | 41.750 | 19.500 | 7.46 | 4.33 | 10.59 | 54.75 | 136.88 |
| 771 | 42.000 | 19.500 | 7.20 | 5.14 | 9.26  | 62.61 | 156.54 |
| 772 | 42.250 | 19.500 | 8.92 | 3.61 | 14.23 | 40.75 | 101.88 |
| 773 | 42.500 | 19.500 | 5.38 | 2.41 | 8.35  | 69.44 | 173.59 |
| 774 | 42.750 | 19.500 | 8.44 | 3.23 | 13.65 | 42.48 | 106.20 |
| 775 | 43.000 | 19.500 | 6.38 | 3.57 | 9.19  | 63.09 | 157.73 |
| 776 | 43.250 | 19.500 | 7.42 | 3.73 | 11.11 | 52.19 | 130.48 |
| 777 | 43.500 | 19.500 | 5.63 | 3.44 | 7.82  | 74.14 | 185.35 |
| 778 | 43.750 | 19.500 | 5.43 | 3.26 | 7.60  | 76.29 | 190.71 |
| 779 | 44.000 | 19.500 | 6.53 | 4.74 | 8.32  | 69.69 | 174.22 |
| 780 | 44.250 | 19.500 | 7.46 | 5.23 | 9.69  | 59.84 | 149.59 |
| 781 | 44.500 | 19.500 | 6.66 | 3.12 | 10.20 | 56.85 | 142.12 |
| 782 | 44.750 | 19.500 | 6.52 | 2.80 | 10.24 | 56.62 | 141.56 |
| 783 | 45.000 | 19.500 | 5.47 | 2.99 | 7.95  | 72.93 | 182.32 |
| 784 | 45.250 | 19.500 | 6.10 | 3.48 | 8.72  | 66.49 | 166.23 |
| 785 | 45.500 | 19.500 | 6.89 | 3.49 | 10.29 | 56.35 | 140.87 |
| 786 | 45.750 | 19.500 | 5.36 | 3.46 | 7.26  | 79.86 | 199.64 |
| 787 | 46.000 | 19.500 | 6.11 | 4.10 | 8.12  | 71.40 | 178.51 |

|     |        |        |      |      |       |       |        |
|-----|--------|--------|------|------|-------|-------|--------|
| 788 | 46.250 | 19.500 | 7.00 | 4.87 | 9.13  | 63.51 | 158.76 |
| 789 | 46.500 | 19.500 | 6.14 | 4.38 | 7.90  | 73.39 | 183.47 |
| 790 | 46.750 | 19.500 | 5.71 | 3.82 | 7.60  | 76.29 | 190.71 |
| 791 | 47.000 | 19.500 | 6.11 | 4.05 | 8.17  | 70.97 | 177.41 |
| 792 | 47.250 | 19.500 | 6.39 | 3.56 | 9.22  | 62.89 | 157.22 |
| 793 | 47.500 | 19.500 | 6.47 | 2.89 | 10.05 | 57.69 | 144.24 |
| 794 | 47.750 | 19.500 | 5.58 | 3.23 | 7.93  | 73.11 | 182.78 |
| 795 | 48.000 | 19.500 | 6.24 | 5.91 | 6.57  | 88.24 | 220.60 |
| 796 | 35.000 | 19.750 | 5.74 | 2.85 | 8.63  | 67.18 | 167.96 |
| 797 | 35.250 | 19.750 | 5.51 | 3.41 | 7.61  | 76.19 | 190.46 |
| 798 | 35.500 | 19.750 | 5.52 | 3.22 | 7.82  | 74.14 | 185.35 |
| 799 | 35.750 | 19.750 | 7.52 | 5.23 | 9.81  | 59.11 | 147.76 |
| 800 | 36.000 | 19.750 | 8.19 | 3.94 | 12.44 | 46.61 | 116.53 |
| 801 | 36.250 | 19.750 | 6.21 | 5.58 | 6.84  | 84.76 | 211.90 |
| 802 | 36.500 | 19.750 | 6.11 | 5.87 | 6.35  | 91.30 | 228.24 |
| 803 | 36.750 | 19.750 | 7.06 | 3.93 | 10.19 | 56.90 | 142.25 |
| 804 | 37.000 | 19.750 | 7.05 | 4.64 | 9.46  | 61.29 | 153.23 |
| 805 | 37.250 | 19.750 | 8.21 | 6.52 | 9.90  | 58.57 | 146.42 |
| 806 | 37.500 | 19.750 | 7.50 | 4.43 | 10.57 | 54.86 | 137.14 |
| 807 | 37.750 | 19.750 | 6.49 | 4.71 | 8.27  | 70.11 | 175.27 |
| 808 | 38.000 | 19.750 | 6.70 | 4.44 | 8.96  | 64.71 | 161.78 |
| 809 | 38.250 | 19.750 | 6.16 | 4.13 | 8.19  | 70.79 | 176.98 |
| 810 | 38.500 | 19.750 | 7.84 | 3.87 | 11.81 | 49.10 | 122.75 |
| 811 | 38.750 | 19.750 | 7.74 | 5.83 | 9.65  | 60.08 | 150.21 |
| 812 | 39.000 | 19.750 | 7.50 | 3.86 | 11.14 | 52.05 | 130.13 |
| 813 | 39.250 | 19.750 | 5.57 | 4.00 | 7.14  | 81.20 | 203.00 |
| 814 | 39.500 | 19.750 | 6.63 | 3.75 | 9.51  | 60.97 | 152.42 |
| 815 | 39.750 | 19.750 | 7.93 | 4.45 | 11.41 | 50.82 | 127.05 |
| 816 | 40.000 | 19.750 | 7.35 | 3.83 | 10.87 | 53.34 | 133.36 |
| 817 | 40.250 | 19.750 | 7.12 | 3.69 | 10.55 | 54.96 | 137.40 |
| 818 | 40.500 | 19.750 | 5.48 | 3.41 | 7.55  | 76.79 | 191.98 |
| 819 | 40.750 | 19.750 | 6.48 | 2.94 | 10.02 | 57.87 | 144.67 |
| 820 | 41.000 | 19.750 | 5.96 | 3.60 | 8.32  | 69.69 | 174.22 |
| 821 | 41.250 | 19.750 | 5.54 | 3.50 | 7.58  | 76.49 | 191.22 |
| 822 | 41.500 | 19.750 | 9.20 | 5.07 | 13.33 | 43.50 | 108.75 |
| 823 | 41.750 | 19.750 | 7.47 | 3.42 | 11.52 | 50.33 | 125.84 |
| 824 | 42.000 | 19.750 | 8.50 | 3.53 | 13.47 | 43.05 | 107.62 |
| 825 | 42.250 | 19.750 | 6.75 | 3.53 | 9.97  | 58.16 | 145.39 |
| 826 | 42.500 | 19.750 | 5.36 | 3.37 | 7.35  | 78.88 | 197.20 |
| 827 | 42.750 | 19.750 | 6.19 | 3.61 | 8.77  | 66.11 | 165.28 |
| 828 | 43.000 | 19.750 | 4.98 | 2.83 | 7.13  | 81.31 | 203.28 |
| 829 | 43.250 | 19.750 | 6.01 | 3.46 | 8.56  | 67.73 | 169.33 |
| 830 | 43.500 | 19.750 | 5.95 | 4.29 | 7.61  | 76.19 | 190.46 |
| 831 | 43.750 | 19.750 | 5.36 | 3.95 | 6.77  | 85.63 | 214.09 |
| 832 | 44.000 | 19.750 | 6.34 | 3.99 | 8.69  | 66.72 | 166.80 |
| 833 | 44.250 | 19.750 | 6.53 | 4.23 | 8.83  | 65.66 | 164.16 |
| 834 | 44.500 | 19.750 | 7.58 | 3.93 | 11.23 | 51.63 | 129.08 |
| 835 | 44.750 | 19.750 | 5.86 | 3.68 | 8.04  | 72.11 | 180.28 |
| 836 | 45.000 | 19.750 | 6.53 | 3.11 | 9.95  | 58.27 | 145.68 |
| 837 | 45.250 | 19.750 | 7.31 | 4.29 | 10.33 | 56.13 | 140.33 |
| 838 | 45.500 | 19.750 | 5.62 | 3.85 | 7.39  | 78.45 | 196.13 |
| 839 | 45.750 | 19.750 | 6.18 | 5.04 | 7.32  | 79.20 | 198.01 |
| 840 | 46.000 | 19.750 | 5.55 | 4.65 | 6.45  | 89.88 | 224.70 |



|     |        |        |      |      |       |        |        |
|-----|--------|--------|------|------|-------|--------|--------|
| 841 | 46.250 | 19.750 | 7.21 | 4.40 | 10.02 | 57.87  | 144.67 |
| 842 | 46.500 | 19.750 | 6.79 | 4.59 | 8.99  | 64.49  | 161.24 |
| 843 | 46.750 | 19.750 | 6.70 | 3.83 | 9.57  | 60.59  | 151.47 |
| 844 | 47.000 | 19.750 | 6.04 | 3.46 | 8.62  | 67.26  | 168.15 |
| 845 | 47.250 | 19.750 | 6.00 | 3.27 | 8.73  | 66.41  | 166.04 |
| 846 | 47.500 | 19.750 | 6.09 | 3.47 | 8.71  | 66.57  | 166.42 |
| 847 | 47.750 | 19.750 | 6.16 | 3.66 | 8.66  | 66.95  | 167.38 |
| 848 | 48.000 | 19.750 | 6.28 | 3.48 | 9.08  | 63.86  | 159.64 |
| 849 | 35.000 | 20.000 | 6.32 | 2.56 | 10.08 | 57.52  | 143.81 |
| 850 | 35.250 | 20.000 | 5.63 | 3.31 | 7.95  | 72.93  | 182.32 |
| 851 | 35.500 | 20.000 | 6.11 | 3.09 | 9.13  | 63.51  | 158.76 |
| 852 | 35.750 | 20.000 | 7.08 | 3.63 | 10.53 | 55.07  | 137.66 |
| 853 | 36.000 | 20.000 | 6.27 | 3.44 | 9.10  | 63.72  | 159.29 |
| 854 | 36.250 | 20.000 | 6.51 | 3.69 | 9.33  | 62.15  | 155.36 |
| 855 | 36.500 | 20.000 | 6.48 | 3.11 | 9.85  | 58.87  | 147.16 |
| 856 | 36.750 | 20.000 | 6.36 | 2.92 | 9.80  | 59.17  | 147.91 |
| 857 | 37.000 | 20.000 | 6.30 | 5.95 | 6.65  | 87.18  | 217.95 |
| 858 | 37.250 | 20.000 | 5.57 | 3.90 | 7.24  | 80.08  | 200.19 |
| 859 | 37.500 | 20.000 | 5.87 | 4.19 | 7.55  | 76.79  | 191.98 |
| 860 | 37.750 | 20.000 | 5.66 | 3.99 | 7.33  | 79.09  | 197.74 |
| 861 | 38.000 | 20.000 | 6.06 | 4.37 | 7.75  | 74.81  | 187.02 |
| 862 | 38.250 | 20.000 | 5.96 | 5.42 | 6.50  | 89.19  | 222.97 |
| 863 | 38.500 | 20.000 | 5.47 | 4.89 | 6.05  | 95.82  | 239.55 |
| 864 | 38.750 | 20.000 | 5.84 | 4.60 | 7.08  | 81.89  | 204.72 |
| 865 | 39.000 | 20.000 | 6.75 | 2.93 | 10.57 | 54.86  | 137.14 |
| 866 | 39.250 | 20.000 | 5.78 | 3.08 | 8.48  | 68.37  | 170.93 |
| 867 | 39.500 | 20.000 | 6.09 | 2.91 | 9.27  | 62.55  | 156.37 |
| 868 | 39.750 | 20.000 | 5.98 | 5.24 | 6.72  | 86.27  | 215.68 |
| 869 | 40.000 | 20.000 | 6.75 | 5.07 | 8.43  | 68.78  | 171.94 |
| 870 | 40.250 | 20.000 | 5.65 | 3.19 | 8.11  | 71.49  | 178.73 |
| 871 | 40.500 | 20.000 | 5.70 | 3.35 | 8.05  | 72.02  | 180.06 |
| 872 | 40.750 | 20.000 | 6.53 | 3.55 | 9.51  | 60.97  | 152.42 |
| 873 | 41.000 | 20.000 | 6.05 | 4.86 | 7.24  | 80.08  | 200.19 |
| 874 | 41.250 | 20.000 | 7.39 | 3.28 | 11.50 | 50.42  | 126.05 |
| 875 | 41.500 | 20.000 | 7.26 | 3.90 | 10.62 | 54.60  | 136.50 |
| 876 | 41.750 | 20.000 | 6.29 | 4.67 | 7.91  | 73.30  | 183.24 |
| 877 | 42.000 | 20.000 | 5.84 | 2.59 | 9.09  | 63.79  | 159.46 |
| 878 | 42.250 | 20.000 | 6.35 | 3.20 | 9.50  | 61.03  | 152.58 |
| 879 | 42.500 | 20.000 | 7.02 | 2.66 | 11.38 | 50.95  | 127.38 |
| 880 | 42.750 | 20.000 | 6.01 | 5.72 | 6.30  | 92.02  | 230.05 |
| 881 | 43.000 | 20.000 | 5.11 | 4.77 | 5.45  | 106.36 | 265.91 |
| 882 | 43.250 | 20.000 | 5.48 | 5.08 | 5.88  | 98.59  | 246.47 |
| 883 | 43.500 | 20.000 | 5.38 | 4.76 | 6.00  | 96.62  | 241.55 |
| 884 | 43.750 | 20.000 | 5.46 | 4.19 | 6.73  | 86.14  | 215.36 |
| 885 | 44.000 | 20.000 | 6.87 | 3.61 | 10.13 | 57.24  | 143.10 |
| 886 | 44.250 | 20.000 | 6.08 | 5.39 | 6.77  | 85.63  | 214.09 |
| 887 | 44.500 | 20.000 | 5.55 | 5.18 | 5.92  | 97.92  | 244.81 |
| 888 | 44.750 | 20.000 | 5.34 | 4.17 | 6.51  | 89.05  | 222.63 |
| 889 | 45.000 | 20.000 | 5.40 | 5.37 | 5.43  | 106.76 | 266.89 |
| 890 | 45.250 | 20.000 | 6.20 | 5.62 | 6.78  | 85.51  | 213.77 |
| 891 | 45.500 | 20.000 | 5.73 | 4.06 | 7.40  | 78.35  | 195.87 |
| 892 | 45.750 | 20.000 | 6.11 | 4.41 | 7.81  | 74.24  | 185.59 |
| 893 | 46.000 | 20.000 | 5.38 | 4.16 | 6.60  | 87.84  | 219.60 |

|     |        |        |       |      |       |       |        |
|-----|--------|--------|-------|------|-------|-------|--------|
| 894 | 46.250 | 20.000 | 5.62  | 4.56 | 6.68  | 86.79 | 216.97 |
| 895 | 46.500 | 20.000 | 6.21  | 4.31 | 8.11  | 71.49 | 178.73 |
| 896 | 46.750 | 20.000 | 5.98  | 3.94 | 8.02  | 72.29 | 180.73 |
| 897 | 47.000 | 20.000 | 6.14  | 4.79 | 7.49  | 77.41 | 193.51 |
| 898 | 47.250 | 20.000 | 6.87  | 3.62 | 10.12 | 57.30 | 143.24 |
| 899 | 47.500 | 20.000 | 7.00  | 3.50 | 10.50 | 55.22 | 138.06 |
| 900 | 47.750 | 20.000 | 6.00  | 3.18 | 8.82  | 65.74 | 164.34 |
| 901 | 48.000 | 20.000 | 6.70  | 3.68 | 9.72  | 59.65 | 149.13 |
| 902 | 35.000 | 20.250 | 8.37  | 5.82 | 10.92 | 53.10 | 132.75 |
| 903 | 35.250 | 20.250 | 8.74  | 5.34 | 12.14 | 47.76 | 119.41 |
| 904 | 35.500 | 20.250 | 8.07  | 6.12 | 10.02 | 57.87 | 144.67 |
| 905 | 35.750 | 20.250 | 7.19  | 5.15 | 9.23  | 62.82 | 157.05 |
| 906 | 36.000 | 20.250 | 8.19  | 7.10 | 9.28  | 62.48 | 156.20 |
| 907 | 36.250 | 20.250 | 8.64  | 7.44 | 9.84  | 58.93 | 147.31 |
| 908 | 36.500 | 20.250 | 8.30  | 6.61 | 9.99  | 58.04 | 145.10 |
| 909 | 36.750 | 20.250 | 7.97  | 5.60 | 10.34 | 56.08 | 140.19 |
| 910 | 37.000 | 20.250 | 7.84  | 4.31 | 11.37 | 51.00 | 127.49 |
| 911 | 37.250 | 20.250 | 8.50  | 6.06 | 10.94 | 53.00 | 132.50 |
| 912 | 37.500 | 20.250 | 10.28 | 5.75 | 14.81 | 39.15 | 97.89  |
| 913 | 37.750 | 20.250 | 9.88  | 5.46 | 14.30 | 40.55 | 101.38 |
| 914 | 38.000 | 20.250 | 9.00  | 5.53 | 12.47 | 46.50 | 116.25 |
| 915 | 38.250 | 20.250 | 11.28 | 6.95 | 15.61 | 37.15 | 92.87  |
| 916 | 38.500 | 20.250 | 8.37  | 5.68 | 11.06 | 52.43 | 131.07 |
| 917 | 38.750 | 20.250 | 10.53 | 7.39 | 13.67 | 42.42 | 106.05 |
| 918 | 39.000 | 20.250 | 8.84  | 7.23 | 10.45 | 55.49 | 138.72 |
| 919 | 39.250 | 20.250 | 9.83  | 7.91 | 11.75 | 49.35 | 123.37 |
| 920 | 39.500 | 20.250 | 10.61 | 6.21 | 15.01 | 38.63 | 96.58  |
| 921 | 39.750 | 20.250 | 8.04  | 4.50 | 11.58 | 50.07 | 125.18 |
| 922 | 40.000 | 20.250 | 9.68  | 5.15 | 14.21 | 40.81 | 102.02 |
| 923 | 40.250 | 20.250 | 9.57  | 5.52 | 13.62 | 42.58 | 106.44 |
| 924 | 40.500 | 20.250 | 11.05 | 6.55 | 15.55 | 37.29 | 93.23  |
| 925 | 40.750 | 20.250 | 9.89  | 6.23 | 13.55 | 42.79 | 106.99 |
| 926 | 41.000 | 20.250 | 10.11 | 6.09 | 14.13 | 41.04 | 102.60 |
| 927 | 41.250 | 20.250 | 9.68  | 5.90 | 13.46 | 43.08 | 107.70 |
| 928 | 41.500 | 20.250 | 7.87  | 5.74 | 10.00 | 57.98 | 144.96 |
| 929 | 41.750 | 20.250 | 8.90  | 5.98 | 11.82 | 49.06 | 122.64 |
| 930 | 42.000 | 20.250 | 7.69  | 5.98 | 9.40  | 61.68 | 154.21 |
| 931 | 42.250 | 20.250 | 7.46  | 6.09 | 8.83  | 65.66 | 164.16 |
| 932 | 42.500 | 20.250 | 7.57  | 5.80 | 9.34  | 62.08 | 155.20 |
| 933 | 42.750 | 20.250 | 8.17  | 5.89 | 10.45 | 55.49 | 138.72 |
| 934 | 43.000 | 20.250 | 8.07  | 5.62 | 10.52 | 55.12 | 137.79 |
| 935 | 43.250 | 20.250 | 7.51  | 4.55 | 10.47 | 55.38 | 138.45 |
| 936 | 43.500 | 20.250 | 7.99  | 4.73 | 11.25 | 51.54 | 128.85 |
| 937 | 43.750 | 20.250 | 10.13 | 7.94 | 12.32 | 47.07 | 117.67 |
| 938 | 44.000 | 20.250 | 9.97  | 5.31 | 14.63 | 39.64 | 99.09  |
| 939 | 44.250 | 20.250 | 9.86  | 6.79 | 12.93 | 44.85 | 112.12 |
| 940 | 44.500 | 20.250 | 7.91  | 5.00 | 10.82 | 53.59 | 133.97 |
| 941 | 44.750 | 20.250 | 8.84  | 7.13 | 10.55 | 54.96 | 137.40 |
| 942 | 45.000 | 20.250 | 9.79  | 6.28 | 13.30 | 43.60 | 109.00 |
| 943 | 45.250 | 20.250 | 9.47  | 6.21 | 12.73 | 45.55 | 113.88 |
| 944 | 45.500 | 20.250 | 9.58  | 5.17 | 13.99 | 41.45 | 103.62 |
| 945 | 45.750 | 20.250 | 7.83  | 4.99 | 10.67 | 54.34 | 135.86 |
| 946 | 46.000 | 20.250 | 8.85  | 7.44 | 10.26 | 56.51 | 141.28 |

|     |        |        |       |      |       |        |        |
|-----|--------|--------|-------|------|-------|--------|--------|
| 947 | 46.250 | 20.250 | 8.33  | 5.59 | 11.07 | 52.38  | 130.95 |
| 948 | 46.500 | 20.250 | 8.03  | 5.94 | 10.12 | 57.30  | 143.24 |
| 949 | 46.750 | 20.250 | 10.98 | 5.39 | 16.57 | 35.00  | 87.49  |
| 950 | 47.000 | 20.250 | 10.25 | 5.98 | 14.52 | 39.94  | 99.84  |
| 951 | 47.250 | 20.250 | 10.66 | 5.08 | 16.24 | 35.71  | 89.27  |
| 952 | 47.500 | 20.250 | 8.87  | 5.98 | 11.76 | 49.31  | 123.27 |
| 953 | 47.750 | 20.250 | 8.08  | 4.49 | 11.67 | 49.69  | 124.22 |
| 954 | 48.000 | 20.250 | 7.79  | 4.87 | 10.71 | 54.14  | 135.35 |
| 955 | 35.000 | 20.500 | 6.26  | 5.06 | 7.46  | 77.72  | 194.29 |
| 956 | 35.250 | 20.500 | 6.84  | 5.20 | 8.48  | 68.37  | 170.93 |
| 957 | 35.500 | 20.500 | 6.57  | 5.42 | 7.72  | 75.10  | 187.75 |
| 958 | 35.750 | 20.500 | 6.94  | 4.94 | 8.94  | 64.86  | 162.14 |
| 959 | 36.000 | 20.500 | 6.27  | 5.72 | 6.82  | 85.01  | 212.52 |
| 960 | 36.250 | 20.500 | 5.39  | 4.75 | 6.03  | 96.14  | 240.34 |
| 961 | 36.500 | 20.500 | 6.39  | 6.70 | 6.08  | 95.35  | 238.37 |
| 962 | 36.750 | 20.500 | 6.84  | 7.04 | 6.64  | 87.31  | 218.27 |
| 963 | 37.000 | 20.500 | 6.50  | 6.21 | 6.79  | 85.38  | 213.46 |
| 964 | 37.250 | 20.500 | 6.17  | 5.20 | 7.14  | 81.20  | 203.00 |
| 965 | 37.500 | 20.500 | 6.04  | 3.91 | 8.17  | 70.97  | 177.41 |
| 966 | 37.750 | 20.500 | 6.70  | 5.66 | 7.74  | 74.91  | 187.27 |
| 967 | 38.000 | 20.500 | 9.48  | 6.55 | 12.41 | 46.73  | 116.81 |
| 968 | 38.250 | 20.500 | 6.57  | 5.28 | 7.86  | 73.76  | 184.41 |
| 969 | 38.500 | 20.500 | 8.73  | 6.99 | 10.47 | 55.38  | 138.45 |
| 970 | 38.750 | 20.500 | 7.04  | 6.83 | 7.25  | 79.97  | 199.92 |
| 971 | 39.000 | 20.500 | 8.03  | 7.51 | 8.55  | 67.81  | 169.53 |
| 972 | 39.250 | 20.500 | 8.81  | 5.81 | 11.81 | 49.10  | 122.75 |
| 973 | 39.500 | 20.500 | 6.24  | 4.10 | 8.38  | 69.19  | 172.97 |
| 974 | 39.750 | 20.500 | 7.88  | 4.75 | 11.01 | 52.67  | 131.66 |
| 975 | 40.000 | 20.500 | 7.77  | 5.12 | 10.42 | 55.65  | 139.12 |
| 976 | 40.250 | 20.500 | 9.25  | 6.15 | 12.35 | 46.95  | 117.38 |
| 977 | 40.500 | 20.500 | 8.09  | 5.83 | 10.35 | 56.02  | 140.06 |
| 978 | 40.750 | 20.500 | 8.31  | 5.69 | 10.93 | 53.05  | 132.63 |
| 979 | 41.000 | 20.500 | 7.88  | 5.50 | 10.26 | 56.51  | 141.28 |
| 980 | 41.250 | 20.500 | 6.07  | 5.34 | 6.80  | 85.26  | 213.14 |
| 981 | 41.500 | 20.500 | 7.10  | 5.58 | 8.62  | 67.26  | 168.15 |
| 982 | 41.750 | 20.500 | 5.89  | 5.58 | 6.20  | 93.50  | 233.76 |
| 983 | 42.000 | 20.500 | 5.66  | 5.69 | 5.63  | 102.96 | 257.41 |
| 984 | 42.250 | 20.500 | 5.77  | 5.40 | 6.14  | 94.42  | 236.04 |
| 985 | 42.500 | 20.500 | 6.37  | 5.49 | 7.25  | 79.97  | 199.92 |
| 986 | 42.750 | 20.500 | 6.27  | 5.22 | 7.32  | 79.20  | 198.01 |
| 987 | 43.000 | 20.500 | 5.71  | 4.15 | 7.27  | 79.75  | 199.37 |
| 988 | 43.250 | 20.500 | 6.19  | 4.33 | 8.05  | 72.02  | 180.06 |
| 989 | 43.500 | 20.500 | 8.33  | 7.54 | 9.12  | 63.58  | 158.94 |
| 990 | 43.750 | 20.500 | 8.37  | 4.40 | 12.34 | 46.99  | 117.48 |
| 991 | 44.000 | 20.500 | 6.41  | 5.68 | 7.14  | 81.20  | 203.00 |
| 992 | 44.250 | 20.500 | 8.44  | 5.89 | 10.99 | 52.76  | 131.90 |
| 993 | 44.500 | 20.500 | 8.17  | 4.91 | 11.43 | 50.73  | 126.83 |
| 994 | 44.750 | 20.500 | 8.06  | 6.39 | 9.73  | 59.59  | 148.98 |
| 995 | 45.000 | 20.500 | 6.11  | 4.60 | 7.62  | 76.09  | 190.21 |
| 996 | 45.250 | 20.500 | 7.04  | 6.73 | 7.35  | 78.88  | 197.20 |
| 997 | 45.500 | 20.500 | 7.99  | 5.88 | 10.10 | 57.41  | 143.52 |
| 998 | 45.750 | 20.500 | 7.67  | 5.81 | 9.53  | 60.84  | 152.10 |
| 999 | 46.000 | 20.500 | 7.78  | 4.77 | 10.79 | 53.74  | 134.35 |

|      |        |        |      |      |       |        |        |
|------|--------|--------|------|------|-------|--------|--------|
| 1000 | 46.250 | 20.500 | 6.03 | 4.59 | 7.47  | 77.61  | 194.03 |
| 1001 | 46.500 | 20.500 | 7.05 | 7.04 | 7.06  | 82.12  | 205.30 |
| 1002 | 46.750 | 20.500 | 6.53 | 5.19 | 7.87  | 73.67  | 184.17 |
| 1003 | 47.000 | 20.500 | 6.23 | 5.54 | 6.92  | 83.78  | 209.45 |
| 1004 | 47.250 | 20.500 | 9.18 | 4.99 | 13.37 | 43.37  | 108.43 |
| 1005 | 47.500 | 20.500 | 8.45 | 5.58 | 11.32 | 51.22  | 128.06 |
| 1006 | 47.750 | 20.500 | 8.86 | 4.68 | 13.04 | 44.47  | 111.17 |
| 1007 | 48.000 | 20.500 | 7.07 | 5.58 | 8.56  | 67.73  | 169.33 |
| 1008 | 35.000 | 20.750 | 5.86 | 5.46 | 6.26  | 92.61  | 231.52 |
| 1009 | 35.250 | 20.750 | 5.57 | 4.89 | 6.25  | 92.76  | 231.89 |
| 1010 | 35.500 | 20.750 | 5.71 | 5.18 | 6.24  | 92.90  | 232.26 |
| 1011 | 35.750 | 20.750 | 5.41 | 5.38 | 5.44  | 106.56 | 266.40 |
| 1012 | 36.000 | 20.750 | 5.87 | 5.68 | 6.06  | 95.66  | 239.16 |
| 1013 | 36.250 | 20.750 | 6.37 | 5.68 | 7.06  | 82.12  | 205.30 |
| 1014 | 36.500 | 20.750 | 6.17 | 5.18 | 7.16  | 80.97  | 202.43 |
| 1015 | 36.750 | 20.750 | 6.28 | 5.84 | 6.72  | 86.27  | 215.68 |
| 1016 | 37.000 | 20.750 | 6.03 | 5.50 | 6.56  | 88.37  | 220.94 |
| 1017 | 37.250 | 20.750 | 6.57 | 5.39 | 7.75  | 74.81  | 187.02 |
| 1018 | 37.500 | 20.750 | 6.46 | 4.25 | 8.67  | 66.87  | 167.19 |
| 1019 | 37.750 | 20.750 | 6.88 | 5.18 | 8.58  | 67.58  | 168.94 |
| 1020 | 38.000 | 20.750 | 6.99 | 5.19 | 8.79  | 65.96  | 164.90 |
| 1021 | 38.250 | 20.750 | 6.49 | 4.70 | 8.28  | 70.02  | 175.06 |
| 1022 | 38.500 | 20.750 | 7.47 | 5.96 | 8.98  | 64.57  | 161.42 |
| 1023 | 38.750 | 20.750 | 5.98 | 5.03 | 6.93  | 83.66  | 209.14 |
| 1024 | 39.000 | 20.750 | 5.79 | 4.66 | 6.92  | 83.78  | 209.45 |
| 1025 | 39.250 | 20.750 | 5.60 | 5.05 | 6.15  | 94.26  | 235.66 |
| 1026 | 39.500 | 20.750 | 5.74 | 5.32 | 6.16  | 94.11  | 235.28 |
| 1027 | 39.750 | 20.750 | 6.59 | 6.86 | 6.32  | 91.73  | 229.32 |
| 1028 | 40.000 | 20.750 | 5.82 | 5.23 | 6.41  | 90.44  | 226.10 |
| 1029 | 40.250 | 20.750 | 5.79 | 5.44 | 6.14  | 94.42  | 236.04 |
| 1030 | 40.500 | 20.750 | 6.69 | 4.92 | 8.46  | 68.53  | 171.33 |
| 1031 | 40.750 | 20.750 | 6.86 | 5.57 | 8.15  | 71.14  | 177.85 |
| 1032 | 41.000 | 20.750 | 5.83 | 5.01 | 6.65  | 87.18  | 217.95 |
| 1033 | 41.250 | 20.750 | 6.30 | 5.43 | 7.17  | 80.86  | 202.15 |
| 1034 | 41.500 | 20.750 | 6.99 | 5.90 | 8.08  | 71.76  | 179.39 |
| 1035 | 41.750 | 20.750 | 6.54 | 4.24 | 8.84  | 65.59  | 163.97 |
| 1036 | 42.000 | 20.750 | 8.16 | 4.57 | 11.75 | 49.35  | 123.37 |
| 1037 | 42.250 | 20.750 | 7.88 | 4.75 | 11.01 | 52.67  | 131.66 |
| 1038 | 42.500 | 20.750 | 6.84 | 6.69 | 6.99  | 82.94  | 207.35 |
| 1039 | 42.750 | 20.750 | 6.64 | 6.09 | 7.19  | 80.63  | 201.58 |
| 1040 | 43.000 | 20.750 | 6.88 | 4.19 | 9.57  | 60.59  | 151.47 |
| 1041 | 43.250 | 20.750 | 7.26 | 4.76 | 9.76  | 59.41  | 148.52 |
| 1042 | 43.500 | 20.750 | 6.32 | 5.09 | 7.55  | 76.79  | 191.98 |
| 1043 | 43.750 | 20.750 | 5.72 | 5.06 | 6.38  | 90.87  | 227.17 |
| 1044 | 44.000 | 20.750 | 6.75 | 4.57 | 8.93  | 64.93  | 162.32 |
| 1045 | 44.250 | 20.750 | 6.29 | 5.39 | 7.19  | 80.63  | 201.58 |
| 1046 | 44.500 | 20.750 | 6.17 | 5.81 | 6.53  | 88.78  | 221.95 |
| 1047 | 44.750 | 20.750 | 7.52 | 4.40 | 10.64 | 54.50  | 136.24 |
| 1048 | 45.000 | 20.750 | 6.57 | 4.41 | 8.73  | 66.41  | 166.04 |
| 1049 | 45.250 | 20.750 | 5.96 | 4.02 | 7.90  | 73.39  | 183.47 |
| 1050 | 45.500 | 20.750 | 5.84 | 4.96 | 6.72  | 86.27  | 215.68 |
| 1051 | 45.750 | 20.750 | 6.07 | 5.33 | 6.81  | 85.13  | 212.83 |
| 1052 | 46.000 | 20.750 | 6.28 | 5.66 | 6.90  | 84.02  | 210.05 |

|      |        |        |      |      |       |       |        |
|------|--------|--------|------|------|-------|-------|--------|
| 1053 | 46.250 | 20.750 | 6.30 | 5.99 | 6.61  | 87.71 | 219.27 |
| 1054 | 46.500 | 20.750 | 6.69 | 4.76 | 8.62  | 67.26 | 168.15 |
| 1055 | 46.750 | 20.750 | 6.15 | 5.53 | 6.77  | 85.63 | 214.09 |
| 1056 | 47.000 | 20.750 | 5.89 | 4.97 | 6.81  | 85.13 | 212.83 |
| 1057 | 47.250 | 20.750 | 6.72 | 5.90 | 7.54  | 76.89 | 192.23 |
| 1058 | 47.500 | 20.750 | 6.30 | 5.72 | 6.88  | 84.27 | 210.66 |
| 1059 | 47.750 | 20.750 | 6.67 | 6.19 | 7.15  | 81.08 | 202.71 |
| 1060 | 48.000 | 20.750 | 7.06 | 5.98 | 8.14  | 71.23 | 178.07 |
| 1061 | 35.000 | 21.000 | 6.88 | 4.82 | 8.94  | 64.86 | 162.14 |
| 1062 | 35.250 | 21.000 | 7.29 | 4.21 | 10.37 | 55.91 | 139.79 |
| 1063 | 35.500 | 21.000 | 6.26 | 5.34 | 7.18  | 80.75 | 201.87 |
| 1064 | 35.750 | 21.000 | 6.84 | 5.39 | 8.29  | 69.94 | 174.85 |
| 1065 | 36.000 | 21.000 | 6.57 | 4.88 | 8.26  | 70.19 | 175.48 |
| 1066 | 36.250 | 21.000 | 6.94 | 5.65 | 8.23  | 70.45 | 176.12 |
| 1067 | 36.500 | 21.000 | 7.27 | 6.63 | 7.91  | 73.30 | 183.24 |
| 1068 | 36.750 | 21.000 | 6.35 | 5.45 | 7.25  | 79.97 | 199.92 |
| 1069 | 37.000 | 21.000 | 7.19 | 5.26 | 9.12  | 63.58 | 158.94 |
| 1070 | 37.250 | 21.000 | 7.84 | 4.99 | 10.69 | 54.24 | 135.60 |
| 1071 | 37.500 | 21.000 | 7.50 | 4.84 | 10.16 | 57.07 | 142.67 |
| 1072 | 37.750 | 21.000 | 6.17 | 5.31 | 7.03  | 82.47 | 206.17 |
| 1073 | 38.000 | 21.000 | 6.04 | 4.83 | 7.25  | 79.97 | 199.92 |
| 1074 | 38.250 | 21.000 | 6.70 | 4.94 | 8.46  | 68.53 | 171.33 |
| 1075 | 38.500 | 21.000 | 8.48 | 4.52 | 12.44 | 46.61 | 116.53 |
| 1076 | 38.750 | 21.000 | 8.08 | 4.44 | 11.72 | 49.48 | 123.69 |
| 1077 | 39.000 | 21.000 | 7.20 | 5.29 | 9.11  | 63.65 | 159.11 |
| 1078 | 39.250 | 21.000 | 6.19 | 5.34 | 7.04  | 82.35 | 205.88 |
| 1079 | 39.500 | 21.000 | 7.33 | 5.39 | 9.27  | 62.55 | 156.37 |
| 1080 | 39.750 | 21.000 | 9.43 | 4.88 | 13.98 | 41.48 | 103.70 |
| 1081 | 40.000 | 21.000 | 6.41 | 5.65 | 7.17  | 80.86 | 202.15 |
| 1082 | 40.250 | 21.000 | 6.36 | 6.63 | 6.09  | 95.19 | 237.98 |
| 1083 | 40.500 | 21.000 | 6.63 | 4.69 | 8.57  | 67.65 | 169.14 |
| 1084 | 40.750 | 21.000 | 7.46 | 4.33 | 10.59 | 54.75 | 136.88 |
| 1085 | 41.000 | 21.000 | 7.20 | 5.14 | 9.26  | 62.61 | 156.54 |
| 1086 | 41.250 | 21.000 | 8.92 | 3.61 | 14.23 | 40.75 | 101.88 |
| 1087 | 41.500 | 21.000 | 5.38 | 2.41 | 8.35  | 69.44 | 173.59 |
| 1088 | 41.750 | 21.000 | 8.44 | 3.23 | 13.65 | 42.48 | 106.20 |
| 1089 | 42.000 | 21.000 | 6.38 | 3.57 | 9.19  | 63.09 | 157.73 |
| 1090 | 42.250 | 21.000 | 7.42 | 3.73 | 11.11 | 52.19 | 130.48 |
| 1091 | 42.500 | 21.000 | 5.63 | 3.44 | 7.82  | 74.14 | 185.35 |
| 1092 | 42.750 | 21.000 | 5.43 | 3.26 | 7.60  | 76.29 | 190.71 |
| 1093 | 43.000 | 21.000 | 6.53 | 4.74 | 8.32  | 69.69 | 174.22 |
| 1094 | 43.250 | 21.000 | 7.46 | 5.23 | 9.69  | 59.84 | 149.59 |
| 1095 | 43.500 | 21.000 | 6.66 | 3.12 | 10.20 | 56.85 | 142.12 |
| 1096 | 43.750 | 21.000 | 6.52 | 2.80 | 10.24 | 56.62 | 141.56 |
| 1097 | 44.000 | 21.000 | 5.47 | 2.99 | 7.95  | 72.93 | 182.32 |
| 1098 | 44.250 | 21.000 | 6.10 | 3.48 | 8.72  | 66.49 | 166.23 |
| 1099 | 44.500 | 21.000 | 6.89 | 3.49 | 10.29 | 56.35 | 140.87 |
| 1100 | 44.750 | 21.000 | 5.36 | 3.46 | 7.26  | 79.86 | 199.64 |
| 1101 | 45.000 | 21.000 | 6.11 | 4.10 | 8.12  | 71.40 | 178.51 |
| 1102 | 45.250 | 21.000 | 7.00 | 4.87 | 9.13  | 63.51 | 158.76 |
| 1103 | 45.500 | 21.000 | 6.14 | 4.38 | 7.90  | 73.39 | 183.47 |
| 1104 | 45.750 | 21.000 | 5.71 | 3.82 | 7.60  | 76.29 | 190.71 |
| 1105 | 46.000 | 21.000 | 6.11 | 4.05 | 8.17  | 70.97 | 177.41 |

|      |        |        |       |      |       |       |        |
|------|--------|--------|-------|------|-------|-------|--------|
| 1106 | 46.250 | 21.000 | 6.39  | 3.56 | 9.22  | 62.89 | 157.22 |
| 1107 | 46.500 | 21.000 | 6.47  | 2.89 | 10.05 | 57.69 | 144.24 |
| 1108 | 46.750 | 21.000 | 5.58  | 3.23 | 7.93  | 73.11 | 182.78 |
| 1109 | 47.000 | 21.000 | 6.24  | 5.91 | 6.57  | 88.24 | 220.60 |
| 1110 | 47.250 | 21.000 | 6.54  | 5.64 | 7.44  | 77.93 | 194.81 |
| 1111 | 47.500 | 21.000 | 6.45  | 5.48 | 7.42  | 78.14 | 195.34 |
| 1112 | 47.750 | 21.000 | 6.38  | 5.42 | 7.34  | 78.99 | 197.47 |
| 1113 | 48.000 | 21.000 | 5.51  | 3.32 | 7.70  | 75.30 | 188.24 |
| 1114 | 35.000 | 21.250 | 5.48  | 3.41 | 7.55  | 76.79 | 191.98 |
| 1115 | 35.250 | 21.250 | 6.48  | 2.94 | 10.02 | 57.87 | 144.67 |
| 1116 | 35.500 | 21.250 | 5.96  | 3.60 | 8.32  | 69.69 | 174.22 |
| 1117 | 35.750 | 21.250 | 5.54  | 3.50 | 7.58  | 76.49 | 191.22 |
| 1118 | 36.000 | 21.250 | 9.20  | 5.07 | 13.33 | 43.50 | 108.75 |
| 1119 | 36.250 | 21.250 | 7.47  | 3.42 | 11.52 | 50.33 | 125.84 |
| 1120 | 36.500 | 21.250 | 8.50  | 3.53 | 13.47 | 43.05 | 107.62 |
| 1121 | 36.750 | 21.250 | 6.75  | 3.53 | 9.97  | 58.16 | 145.39 |
| 1122 | 37.000 | 21.250 | 5.36  | 3.37 | 7.35  | 78.88 | 197.20 |
| 1123 | 37.250 | 21.250 | 5.77  | 4.29 | 7.25  | 79.97 | 199.92 |
| 1124 | 37.500 | 21.250 | 7.34  | 4.69 | 9.99  | 58.03 | 145.09 |
| 1125 | 37.750 | 21.250 | 7.99  | 4.73 | 11.25 | 51.54 | 128.85 |
| 1126 | 38.000 | 21.250 | 10.13 | 7.94 | 12.32 | 47.07 | 117.67 |
| 1127 | 38.250 | 21.250 | 10.17 | 4.80 | 15.54 | 37.32 | 93.29  |
| 1128 | 38.500 | 21.250 | 8.21  | 6.08 | 10.34 | 56.08 | 140.19 |
| 1129 | 38.750 | 21.250 | 10.24 | 6.29 | 14.19 | 40.87 | 102.16 |
| 1130 | 39.000 | 21.250 | 9.97  | 5.31 | 14.63 | 39.64 | 99.09  |
| 1131 | 39.250 | 21.250 | 9.86  | 6.79 | 12.93 | 44.85 | 112.12 |
| 1132 | 39.500 | 21.250 | 7.91  | 5.00 | 10.82 | 53.59 | 133.97 |
| 1133 | 39.750 | 21.250 | 8.84  | 7.13 | 10.55 | 54.96 | 137.40 |
| 1134 | 40.000 | 21.250 | 9.79  | 6.28 | 13.30 | 43.60 | 109.00 |
| 1135 | 40.250 | 21.250 | 9.47  | 6.21 | 12.73 | 45.55 | 113.88 |
| 1136 | 40.500 | 21.250 | 9.58  | 5.17 | 13.99 | 41.45 | 103.62 |
| 1137 | 40.750 | 21.250 | 7.83  | 4.99 | 10.67 | 54.34 | 135.86 |
| 1138 | 41.000 | 21.250 | 8.85  | 7.44 | 10.26 | 56.51 | 141.28 |
| 1139 | 41.250 | 21.250 | 8.33  | 5.59 | 11.07 | 52.38 | 130.95 |
| 1140 | 41.500 | 21.250 | 8.03  | 5.94 | 10.12 | 57.30 | 143.24 |
| 1141 | 41.750 | 21.250 | 10.98 | 5.39 | 16.57 | 35.00 | 87.49  |
| 1142 | 42.000 | 21.250 | 10.25 | 5.98 | 14.52 | 39.94 | 99.84  |
| 1143 | 42.250 | 21.250 | 10.66 | 5.08 | 16.24 | 35.71 | 89.27  |
| 1144 | 42.500 | 21.250 | 8.87  | 5.98 | 11.76 | 49.31 | 123.27 |
| 1145 | 42.750 | 21.250 | 8.08  | 4.49 | 11.67 | 49.69 | 124.22 |
| 1146 | 43.000 | 21.250 | 7.79  | 4.87 | 10.71 | 54.14 | 135.35 |
| 1147 | 43.250 | 21.250 | 8.56  | 5.04 | 12.08 | 48.00 | 120.00 |
| 1148 | 43.500 | 21.250 | 8.06  | 6.50 | 9.62  | 60.27 | 150.68 |
| 1149 | 43.750 | 21.250 | 8.87  | 6.05 | 11.69 | 49.60 | 124.01 |
| 1150 | 44.000 | 21.250 | 9.00  | 6.45 | 11.55 | 50.20 | 125.51 |
| 1151 | 44.250 | 21.250 | 7.41  | 6.36 | 8.46  | 68.53 | 171.33 |
| 1152 | 44.500 | 21.250 | 8.38  | 5.66 | 11.10 | 52.24 | 130.60 |
| 1153 | 44.750 | 21.250 | 7.02  | 5.81 | 8.23  | 70.45 | 176.12 |
| 1154 | 45.000 | 21.250 | 5.65  | 5.25 | 6.05  | 95.82 | 239.55 |
| 1155 | 45.250 | 21.250 | 5.56  | 4.98 | 6.14  | 94.42 | 236.04 |
| 1156 | 45.500 | 21.250 | 5.51  | 5.07 | 5.95  | 97.43 | 243.57 |
| 1157 | 45.750 | 21.250 | 6.91  | 7.21 | 6.61  | 87.71 | 219.27 |
| 1158 | 46.000 | 21.250 | 6.72  | 5.35 | 8.09  | 71.67 | 179.17 |

|      |        |        |      |      |       |        |        |
|------|--------|--------|------|------|-------|--------|--------|
| 1159 | 46.250 | 21.250 | 7.00 | 5.53 | 8.47  | 68.45  | 171.13 |
| 1160 | 46.500 | 21.250 | 6.69 | 4.92 | 8.46  | 68.53  | 171.33 |
| 1161 | 46.750 | 21.250 | 6.86 | 5.57 | 8.15  | 71.14  | 177.85 |
| 1162 | 47.000 | 21.250 | 5.83 | 5.01 | 6.65  | 87.18  | 217.95 |
| 1163 | 47.250 | 21.250 | 6.30 | 5.43 | 7.17  | 80.86  | 202.15 |
| 1164 | 47.500 | 21.250 | 6.99 | 5.90 | 8.08  | 71.76  | 179.39 |
| 1165 | 47.750 | 21.250 | 6.54 | 4.24 | 8.84  | 65.59  | 163.97 |
| 1166 | 48.000 | 21.250 | 8.16 | 4.57 | 11.75 | 49.35  | 123.37 |
| 1167 | 35.000 | 21.500 | 7.56 | 6.39 | 8.73  | 66.41  | 166.04 |
| 1168 | 35.250 | 21.500 | 8.66 | 5.54 | 11.78 | 49.22  | 123.06 |
| 1169 | 35.500 | 21.500 | 9.71 | 5.40 | 14.02 | 41.36  | 103.40 |
| 1170 | 35.750 | 21.500 | 6.54 | 5.06 | 8.02  | 72.29  | 180.73 |
| 1171 | 36.000 | 21.500 | 8.86 | 4.81 | 12.91 | 44.92  | 112.29 |
| 1172 | 36.250 | 21.500 | 7.13 | 5.39 | 8.87  | 65.37  | 163.42 |
| 1173 | 36.500 | 21.500 | 8.15 | 5.66 | 10.64 | 54.50  | 136.24 |
| 1174 | 36.750 | 21.500 | 5.93 | 6.19 | 5.67  | 102.24 | 255.60 |
| 1175 | 37.000 | 21.500 | 6.54 | 5.70 | 7.38  | 78.56  | 196.40 |
| 1176 | 37.250 | 21.500 | 6.86 | 5.80 | 7.92  | 73.20  | 183.01 |
| 1177 | 37.500 | 21.500 | 8.21 | 5.35 | 11.07 | 52.38  | 130.95 |
| 1178 | 37.750 | 21.500 | 7.46 | 5.15 | 9.77  | 59.35  | 148.37 |
| 1179 | 38.000 | 21.500 | 6.99 | 6.01 | 7.97  | 72.75  | 181.86 |
| 1180 | 38.250 | 21.500 | 6.42 | 5.89 | 6.95  | 83.42  | 208.54 |
| 1181 | 38.500 | 21.500 | 6.82 | 5.07 | 8.57  | 67.65  | 169.14 |
| 1182 | 38.750 | 21.500 | 7.57 | 5.80 | 9.34  | 62.08  | 155.20 |
| 1183 | 39.000 | 21.500 | 6.47 | 5.19 | 7.75  | 74.81  | 187.02 |
| 1184 | 39.250 | 21.500 | 6.88 | 4.82 | 8.94  | 64.86  | 162.14 |
| 1185 | 39.500 | 21.500 | 7.29 | 4.21 | 10.37 | 55.91  | 139.79 |
| 1186 | 39.750 | 21.500 | 6.26 | 5.34 | 7.18  | 80.75  | 201.87 |
| 1187 | 40.000 | 21.500 | 6.84 | 5.39 | 8.29  | 69.94  | 174.85 |
| 1188 | 40.250 | 21.500 | 7.10 | 6.01 | 8.19  | 70.79  | 176.98 |
| 1189 | 40.500 | 21.500 | 5.95 | 5.89 | 6.01  | 96.46  | 241.14 |
| 1190 | 40.750 | 21.500 | 6.16 | 5.07 | 7.25  | 79.97  | 199.92 |
| 1191 | 41.000 | 21.500 | 6.91 | 5.80 | 8.02  | 72.29  | 180.73 |
| 1192 | 41.250 | 21.500 | 5.57 | 4.69 | 6.45  | 89.88  | 224.70 |
| 1193 | 41.500 | 21.500 | 6.36 | 5.40 | 7.32  | 79.20  | 198.01 |
| 1194 | 41.750 | 21.500 | 5.71 | 4.21 | 7.21  | 80.41  | 201.03 |
| 1195 | 42.000 | 21.500 | 6.19 | 5.34 | 7.04  | 82.35  | 205.88 |
| 1196 | 42.250 | 21.500 | 7.33 | 5.39 | 9.27  | 62.55  | 156.37 |
| 1197 | 42.500 | 21.500 | 9.43 | 4.88 | 13.98 | 41.48  | 103.70 |
| 1198 | 42.750 | 21.500 | 6.41 | 5.65 | 7.17  | 80.86  | 202.15 |
| 1199 | 43.000 | 21.500 | 6.36 | 6.63 | 6.09  | 95.19  | 237.98 |
| 1200 | 43.250 | 21.500 | 6.63 | 4.69 | 8.57  | 67.65  | 169.14 |
| 1201 | 43.500 | 21.500 | 7.46 | 4.33 | 10.59 | 54.75  | 136.88 |
| 1202 | 43.750 | 21.500 | 7.20 | 5.14 | 9.26  | 62.61  | 156.54 |
| 1203 | 44.000 | 21.500 | 8.92 | 3.61 | 14.23 | 40.75  | 101.88 |
| 1204 | 44.250 | 21.500 | 5.38 | 2.41 | 8.35  | 69.44  | 173.59 |
| 1205 | 44.500 | 21.500 | 8.44 | 3.23 | 13.65 | 42.48  | 106.20 |
| 1206 | 44.750 | 21.500 | 6.38 | 3.57 | 9.19  | 63.09  | 157.73 |
| 1207 | 45.000 | 21.500 | 7.42 | 3.73 | 11.11 | 52.19  | 130.48 |
| 1208 | 45.250 | 21.500 | 5.63 | 3.44 | 7.82  | 74.14  | 185.35 |
| 1209 | 45.500 | 21.500 | 5.43 | 3.26 | 7.60  | 76.29  | 190.71 |
| 1210 | 45.750 | 21.500 | 6.53 | 4.74 | 8.32  | 69.69  | 174.22 |
| 1211 | 46.000 | 21.500 | 7.46 | 5.23 | 9.69  | 59.84  | 149.59 |

|      |        |        |      |      |       |       |        |
|------|--------|--------|------|------|-------|-------|--------|
| 1212 | 46.250 | 21.500 | 6.66 | 3.12 | 10.20 | 56.85 | 142.12 |
| 1213 | 46.500 | 21.500 | 6.52 | 2.80 | 10.24 | 56.62 | 141.56 |
| 1214 | 46.750 | 21.500 | 5.47 | 2.99 | 7.95  | 72.93 | 182.32 |
| 1215 | 47.000 | 21.500 | 6.10 | 3.48 | 8.72  | 66.49 | 166.23 |
| 1216 | 47.250 | 21.500 | 6.89 | 3.49 | 10.29 | 56.35 | 140.87 |
| 1217 | 47.500 | 21.500 | 8.38 | 4.55 | 12.21 | 47.49 | 118.73 |
| 1218 | 47.750 | 21.500 | 7.41 | 4.67 | 10.15 | 57.13 | 142.81 |
| 1219 | 48.000 | 21.500 | 7.73 | 3.86 | 11.60 | 49.99 | 124.97 |
| 1220 | 35.000 | 21.750 | 5.57 | 4.00 | 7.14  | 81.20 | 203.00 |
| 1221 | 35.250 | 21.750 | 6.63 | 3.75 | 9.51  | 60.97 | 152.42 |
| 1222 | 35.500 | 21.750 | 6.18 | 5.04 | 7.32  | 79.20 | 198.01 |
| 1223 | 35.750 | 21.750 | 5.55 | 4.65 | 6.45  | 89.88 | 224.70 |
| 1224 | 36.000 | 21.750 | 7.21 | 4.40 | 10.02 | 57.87 | 144.67 |
| 1225 | 36.250 | 21.750 | 6.79 | 4.59 | 8.99  | 64.49 | 161.24 |
| 1226 | 36.500 | 21.750 | 6.70 | 3.83 | 9.57  | 60.59 | 151.47 |
| 1227 | 36.750 | 21.750 | 6.04 | 3.46 | 8.62  | 67.26 | 168.15 |
| 1228 | 37.000 | 21.750 | 6.00 | 3.27 | 8.73  | 66.41 | 166.04 |
| 1229 | 37.250 | 21.750 | 6.09 | 3.47 | 8.71  | 66.57 | 166.42 |
| 1230 | 37.500 | 21.750 | 6.16 | 3.66 | 8.66  | 66.95 | 167.38 |
| 1231 | 37.750 | 21.750 | 6.28 | 3.48 | 9.08  | 63.86 | 159.64 |
| 1232 | 38.000 | 21.750 | 5.56 | 3.30 | 7.82  | 74.14 | 185.35 |
| 1233 | 38.250 | 21.750 | 6.13 | 3.22 | 9.04  | 64.14 | 160.35 |
| 1234 | 38.500 | 21.750 | 6.75 | 2.57 | 10.93 | 53.05 | 132.63 |
| 1235 | 38.750 | 21.750 | 5.52 | 3.57 | 7.47  | 77.61 | 194.03 |
| 1236 | 39.000 | 21.750 | 6.61 | 3.97 | 9.25  | 62.68 | 156.71 |
| 1237 | 39.250 | 21.750 | 6.99 | 4.32 | 9.66  | 60.02 | 150.06 |
| 1238 | 39.500 | 21.750 | 5.66 | 3.28 | 8.04  | 72.11 | 180.28 |
| 1239 | 39.750 | 21.750 | 5.84 | 3.41 | 8.27  | 70.11 | 175.27 |
| 1240 | 40.000 | 21.750 | 5.51 | 3.57 | 7.45  | 77.82 | 194.55 |
| 1241 | 40.250 | 21.750 | 6.09 | 2.97 | 9.21  | 62.95 | 157.39 |
| 1242 | 40.500 | 21.750 | 5.69 | 4.47 | 6.91  | 83.90 | 209.75 |
| 1243 | 40.750 | 21.750 | 5.54 | 3.53 | 7.55  | 76.79 | 191.98 |
| 1244 | 41.000 | 21.750 | 5.60 | 3.76 | 7.44  | 77.93 | 194.81 |
| 1245 | 41.250 | 21.750 | 6.61 | 3.10 | 10.12 | 57.30 | 143.24 |
| 1246 | 41.500 | 21.750 | 6.00 | 3.74 | 8.26  | 70.19 | 175.48 |
| 1247 | 41.750 | 21.750 | 7.65 | 5.66 | 9.64  | 60.15 | 150.37 |
| 1248 | 42.000 | 21.750 | 6.71 | 3.38 | 10.04 | 57.75 | 144.38 |
| 1249 | 42.250 | 21.750 | 6.90 | 3.85 | 9.95  | 58.27 | 145.68 |
| 1250 | 42.500 | 21.750 | 6.96 | 3.48 | 10.44 | 55.54 | 138.85 |
| 1251 | 42.750 | 21.750 | 6.09 | 2.91 | 9.27  | 62.55 | 156.37 |
| 1252 | 43.000 | 21.750 | 5.98 | 5.24 | 6.72  | 86.27 | 215.68 |
| 1253 | 43.250 | 21.750 | 6.75 | 5.07 | 8.43  | 68.78 | 171.94 |
| 1254 | 43.500 | 21.750 | 5.65 | 3.19 | 8.11  | 71.49 | 178.73 |
| 1255 | 43.750 | 21.750 | 5.70 | 3.35 | 8.05  | 72.02 | 180.06 |
| 1256 | 44.000 | 21.750 | 6.53 | 3.55 | 9.51  | 60.97 | 152.42 |
| 1257 | 44.250 | 21.750 | 6.05 | 4.86 | 7.24  | 80.08 | 200.19 |
| 1258 | 44.500 | 21.750 | 7.39 | 3.28 | 11.50 | 50.42 | 126.05 |
| 1259 | 44.750 | 21.750 | 7.26 | 3.90 | 10.62 | 54.60 | 136.50 |
| 1260 | 45.000 | 21.750 | 6.29 | 4.67 | 7.91  | 73.30 | 183.24 |
| 1261 | 45.250 | 21.750 | 5.84 | 2.59 | 9.09  | 63.79 | 159.46 |
| 1262 | 45.500 | 21.750 | 6.35 | 3.20 | 9.50  | 61.03 | 152.58 |
| 1263 | 45.750 | 21.750 | 7.02 | 2.66 | 11.38 | 50.95 | 127.38 |
| 1264 | 46.000 | 21.750 | 6.01 | 5.72 | 6.30  | 92.02 | 230.05 |



|      |        |        |       |      |       |        |        |
|------|--------|--------|-------|------|-------|--------|--------|
| 1265 | 46.250 | 21.750 | 5.11  | 4.77 | 5.45  | 106.36 | 265.91 |
| 1266 | 46.500 | 21.750 | 5.48  | 5.08 | 5.88  | 98.59  | 246.47 |
| 1267 | 46.750 | 21.750 | 5.38  | 4.76 | 6.00  | 96.62  | 241.55 |
| 1268 | 47.000 | 21.750 | 5.46  | 4.19 | 6.73  | 86.14  | 215.36 |
| 1269 | 47.250 | 21.750 | 6.87  | 3.61 | 10.13 | 57.24  | 143.10 |
| 1270 | 47.500 | 21.750 | 6.08  | 5.39 | 6.77  | 85.63  | 214.09 |
| 1271 | 47.750 | 21.750 | 5.55  | 5.18 | 5.92  | 97.92  | 244.81 |
| 1272 | 48.000 | 21.750 | 5.34  | 4.17 | 6.51  | 89.05  | 222.63 |
| 1273 | 35.000 | 22.000 | 10.28 | 5.75 | 14.81 | 39.15  | 97.89  |
| 1274 | 35.250 | 22.000 | 9.88  | 5.46 | 14.30 | 40.55  | 101.38 |
| 1275 | 35.500 | 22.000 | 9.00  | 5.53 | 12.47 | 46.50  | 116.25 |
| 1276 | 35.750 | 22.000 | 11.28 | 6.95 | 15.61 | 37.15  | 92.87  |
| 1277 | 36.000 | 22.000 | 8.37  | 5.68 | 11.06 | 52.43  | 131.07 |
| 1278 | 36.250 | 22.000 | 10.53 | 7.39 | 13.67 | 42.42  | 106.05 |
| 1279 | 36.500 | 22.000 | 8.84  | 7.23 | 10.45 | 55.49  | 138.72 |
| 1280 | 36.750 | 22.000 | 9.83  | 7.91 | 11.75 | 49.35  | 123.37 |
| 1281 | 37.000 | 22.000 | 10.61 | 6.21 | 15.01 | 38.63  | 96.58  |
| 1282 | 37.250 | 22.000 | 8.04  | 4.50 | 11.58 | 50.07  | 125.18 |
| 1283 | 37.500 | 22.000 | 9.68  | 5.15 | 14.21 | 40.81  | 102.02 |
| 1284 | 37.750 | 22.000 | 9.57  | 5.52 | 13.62 | 42.58  | 106.44 |
| 1285 | 38.000 | 22.000 | 11.05 | 6.55 | 15.55 | 37.29  | 93.23  |
| 1286 | 38.250 | 22.000 | 9.89  | 6.23 | 13.55 | 42.79  | 106.99 |
| 1287 | 38.500 | 22.000 | 10.11 | 6.09 | 14.13 | 41.04  | 102.60 |
| 1288 | 38.750 | 22.000 | 10.98 | 5.39 | 16.57 | 35.00  | 87.49  |
| 1289 | 39.000 | 22.000 | 10.25 | 5.98 | 14.52 | 39.94  | 99.84  |
| 1290 | 39.250 | 22.000 | 10.66 | 5.08 | 16.24 | 35.71  | 89.27  |
| 1291 | 39.500 | 22.000 | 8.87  | 5.98 | 11.76 | 49.31  | 123.27 |
| 1292 | 39.750 | 22.000 | 8.08  | 4.49 | 11.67 | 49.69  | 124.22 |
| 1293 | 40.000 | 22.000 | 7.79  | 4.87 | 10.71 | 54.14  | 135.35 |
| 1294 | 40.250 | 22.000 | 8.56  | 5.04 | 12.08 | 48.00  | 120.00 |
| 1295 | 40.500 | 22.000 | 8.06  | 6.50 | 9.62  | 60.27  | 150.68 |
| 1296 | 40.750 | 22.000 | 8.87  | 6.05 | 11.69 | 49.60  | 124.01 |
| 1297 | 41.000 | 22.000 | 9.00  | 6.45 | 11.55 | 50.20  | 125.51 |
| 1298 | 41.250 | 22.000 | 7.41  | 6.36 | 8.46  | 68.53  | 171.33 |
| 1299 | 41.500 | 22.000 | 8.38  | 5.66 | 11.10 | 52.24  | 130.60 |
| 1300 | 41.750 | 22.000 | 7.02  | 5.81 | 8.23  | 70.45  | 176.12 |
| 1301 | 42.000 | 22.000 | 9.71  | 3.81 | 15.61 | 37.15  | 92.87  |
| 1302 | 42.250 | 22.000 | 6.54  | 5.86 | 7.22  | 80.30  | 200.75 |
| 1303 | 42.500 | 22.000 | 6.86  | 5.62 | 8.10  | 71.58  | 178.95 |
| 1304 | 42.750 | 22.000 | 7.13  | 5.76 | 8.50  | 68.21  | 170.53 |
| 1305 | 43.000 | 22.000 | 7.15  | 5.28 | 9.02  | 64.28  | 160.70 |
| 1306 | 43.250 | 22.000 | 5.93  | 4.73 | 7.13  | 81.31  | 203.28 |
| 1307 | 43.500 | 22.000 | 6.54  | 5.07 | 8.01  | 72.38  | 180.96 |
| 1308 | 43.750 | 22.000 | 6.86  | 6.01 | 7.71  | 75.20  | 187.99 |
| 1309 | 44.000 | 22.000 | 8.21  | 6.65 | 9.77  | 59.35  | 148.37 |
| 1310 | 44.250 | 22.000 | 7.46  | 4.01 | 10.91 | 53.15  | 132.87 |
| 1311 | 44.500 | 22.000 | 6.99  | 4.29 | 9.69  | 59.84  | 149.59 |
| 1312 | 44.750 | 22.000 | 6.42  | 4.45 | 8.39  | 69.11  | 172.76 |
| 1313 | 45.000 | 22.000 | 6.82  | 5.00 | 8.64  | 67.11  | 167.77 |
| 1314 | 45.250 | 22.000 | 7.57  | 5.31 | 9.83  | 58.99  | 147.46 |
| 1315 | 45.500 | 22.000 | 6.47  | 5.47 | 7.47  | 77.61  | 194.03 |
| 1316 | 45.750 | 22.000 | 6.88  | 5.70 | 8.06  | 71.93  | 179.83 |
| 1317 | 46.000 | 22.000 | 7.29  | 5.80 | 8.78  | 66.04  | 165.09 |

|      |        |        |      |      |       |        |        |
|------|--------|--------|------|------|-------|--------|--------|
| 1318 | 46.250 | 22.000 | 8.31 | 5.69 | 10.93 | 53.05  | 132.63 |
| 1319 | 46.500 | 22.000 | 7.88 | 5.50 | 10.26 | 56.51  | 141.28 |
| 1320 | 46.750 | 22.000 | 6.07 | 5.34 | 6.80  | 85.26  | 213.14 |
| 1321 | 47.000 | 22.000 | 7.10 | 5.58 | 8.62  | 67.26  | 168.15 |
| 1322 | 47.250 | 22.000 | 5.89 | 5.58 | 6.20  | 93.50  | 233.76 |
| 1323 | 47.500 | 22.000 | 5.66 | 5.69 | 5.63  | 102.96 | 257.41 |
| 1324 | 47.750 | 22.000 | 5.77 | 5.40 | 6.14  | 94.42  | 236.04 |
| 1325 | 48.000 | 22.000 | 6.37 | 5.49 | 7.25  | 79.97  | 199.92 |
| 1326 | 35.000 | 22.250 | 6.82 | 5.67 | 7.97  | 72.75  | 181.86 |
| 1327 | 35.250 | 22.250 | 6.37 | 6.27 | 6.47  | 89.60  | 224.01 |
| 1328 | 35.500 | 22.250 | 5.93 | 5.48 | 6.38  | 90.87  | 227.17 |
| 1329 | 35.750 | 22.250 | 5.86 | 5.46 | 6.26  | 92.61  | 231.52 |
| 1330 | 36.000 | 22.250 | 5.57 | 4.89 | 6.25  | 92.76  | 231.89 |
| 1331 | 36.250 | 22.250 | 5.71 | 5.18 | 6.24  | 92.90  | 232.26 |
| 1332 | 36.500 | 22.250 | 5.41 | 5.38 | 5.44  | 106.56 | 266.40 |
| 1333 | 36.750 | 22.250 | 5.87 | 5.68 | 6.06  | 95.66  | 239.16 |
| 1334 | 37.000 | 22.250 | 6.37 | 5.68 | 7.06  | 82.12  | 205.30 |
| 1335 | 37.250 | 22.250 | 6.17 | 5.18 | 7.16  | 80.97  | 202.43 |
| 1336 | 37.500 | 22.250 | 6.28 | 5.84 | 6.72  | 86.27  | 215.68 |
| 1337 | 37.750 | 22.250 | 6.03 | 5.50 | 6.56  | 88.37  | 220.94 |
| 1338 | 38.000 | 22.250 | 6.57 | 5.39 | 7.75  | 74.81  | 187.02 |
| 1339 | 38.250 | 22.250 | 6.46 | 4.25 | 8.67  | 66.87  | 167.19 |
| 1340 | 38.500 | 22.250 | 6.88 | 5.18 | 8.58  | 67.58  | 168.94 |
| 1341 | 38.750 | 22.250 | 6.99 | 5.19 | 8.79  | 65.96  | 164.90 |
| 1342 | 39.000 | 22.250 | 6.49 | 4.70 | 8.28  | 70.02  | 175.06 |
| 1343 | 39.250 | 22.250 | 7.47 | 5.96 | 8.98  | 64.57  | 161.42 |
| 1344 | 39.500 | 22.250 | 5.98 | 5.03 | 6.93  | 83.66  | 209.14 |
| 1345 | 39.750 | 22.250 | 5.79 | 4.66 | 6.92  | 83.78  | 209.45 |
| 1346 | 40.000 | 22.250 | 5.60 | 5.05 | 6.15  | 94.26  | 235.66 |
| 1347 | 40.250 | 22.250 | 5.74 | 5.32 | 6.16  | 94.11  | 235.28 |
| 1348 | 40.500 | 22.250 | 6.59 | 6.86 | 6.32  | 91.73  | 229.32 |
| 1349 | 40.750 | 22.250 | 5.82 | 5.23 | 6.41  | 90.44  | 226.10 |
| 1350 | 41.000 | 22.250 | 5.79 | 5.44 | 6.14  | 94.42  | 236.04 |
| 1351 | 41.250 | 22.250 | 6.00 | 4.76 | 7.24  | 80.08  | 200.19 |
| 1352 | 41.500 | 22.250 | 6.83 | 6.00 | 7.66  | 75.69  | 189.22 |
| 1353 | 41.750 | 22.250 | 6.68 | 6.23 | 7.13  | 81.31  | 203.28 |
| 1354 | 42.000 | 22.250 | 6.67 | 5.96 | 7.38  | 78.56  | 196.40 |
| 1355 | 42.250 | 22.250 | 6.64 | 6.09 | 7.19  | 80.63  | 201.58 |
| 1356 | 42.500 | 22.250 | 6.88 | 4.19 | 9.57  | 60.59  | 151.47 |
| 1357 | 42.750 | 22.250 | 7.26 | 4.76 | 9.76  | 59.41  | 148.52 |
| 1358 | 43.000 | 22.250 | 6.32 | 5.09 | 7.55  | 76.79  | 191.98 |
| 1359 | 43.250 | 22.250 | 5.72 | 5.06 | 6.38  | 90.87  | 227.17 |
| 1360 | 43.500 | 22.250 | 6.75 | 4.57 | 8.93  | 64.93  | 162.32 |
| 1361 | 43.750 | 22.250 | 6.29 | 5.39 | 7.19  | 80.63  | 201.58 |
| 1362 | 44.000 | 22.250 | 6.17 | 5.81 | 6.53  | 88.78  | 221.95 |
| 1363 | 44.250 | 22.250 | 7.52 | 4.40 | 10.64 | 54.50  | 136.24 |
| 1364 | 44.500 | 22.250 | 6.57 | 4.41 | 8.73  | 66.41  | 166.04 |
| 1365 | 44.750 | 22.250 | 5.96 | 4.02 | 7.90  | 73.39  | 183.47 |
| 1366 | 45.000 | 22.250 | 5.84 | 4.96 | 6.72  | 86.27  | 215.68 |
| 1367 | 45.250 | 22.250 | 6.07 | 5.33 | 6.81  | 85.13  | 212.83 |
| 1368 | 45.500 | 22.250 | 6.28 | 5.66 | 6.90  | 84.02  | 210.05 |
| 1369 | 45.750 | 22.250 | 6.30 | 5.99 | 6.61  | 87.71  | 219.27 |
| 1370 | 46.000 | 22.250 | 6.69 | 4.76 | 8.62  | 67.26  | 168.15 |

|      |        |        |      |      |       |       |        |
|------|--------|--------|------|------|-------|-------|--------|
| 1371 | 46.250 | 22.250 | 6.15 | 5.53 | 6.77  | 85.63 | 214.09 |
| 1372 | 46.500 | 22.250 | 5.89 | 4.97 | 6.81  | 85.13 | 212.83 |
| 1373 | 46.750 | 22.250 | 6.72 | 5.90 | 7.54  | 76.89 | 192.23 |
| 1374 | 47.000 | 22.250 | 6.30 | 5.72 | 6.88  | 84.27 | 210.66 |
| 1375 | 47.250 | 22.250 | 6.67 | 6.19 | 7.15  | 81.08 | 202.71 |
| 1376 | 47.500 | 22.250 | 7.06 | 5.98 | 8.14  | 71.23 | 178.07 |
| 1377 | 47.750 | 22.250 | 7.27 | 5.52 | 9.02  | 64.28 | 160.70 |
| 1378 | 48.000 | 22.250 | 5.88 | 5.35 | 6.41  | 90.44 | 226.10 |
| 1379 | 35.000 | 22.500 | 6.35 | 5.45 | 7.25  | 79.97 | 199.92 |
| 1380 | 35.250 | 22.500 | 7.19 | 5.26 | 9.12  | 63.58 | 158.94 |
| 1381 | 35.500 | 22.500 | 7.84 | 4.99 | 10.69 | 54.24 | 135.60 |
| 1382 | 35.750 | 22.500 | 7.50 | 4.84 | 10.16 | 57.07 | 142.67 |
| 1383 | 36.000 | 22.500 | 6.17 | 5.31 | 7.03  | 82.47 | 206.17 |
| 1384 | 36.250 | 22.500 | 6.04 | 4.83 | 7.25  | 79.97 | 199.92 |
| 1385 | 36.500 | 22.500 | 6.70 | 4.94 | 8.46  | 68.53 | 171.33 |
| 1386 | 36.750 | 22.500 | 8.48 | 4.52 | 12.44 | 46.61 | 116.53 |
| 1387 | 37.000 | 22.500 | 8.08 | 4.44 | 11.72 | 49.48 | 123.69 |
| 1388 | 37.250 | 22.500 | 7.20 | 5.29 | 9.11  | 63.65 | 159.11 |
| 1389 | 37.500 | 22.500 | 9.48 | 5.66 | 13.30 | 43.60 | 109.00 |
| 1390 | 37.750 | 22.500 | 6.57 | 5.29 | 7.85  | 73.86 | 184.64 |
| 1391 | 38.000 | 22.500 | 8.73 | 6.39 | 11.07 | 52.38 | 130.95 |
| 1392 | 38.250 | 22.500 | 7.04 | 5.54 | 8.54  | 67.89 | 169.73 |
| 1393 | 38.500 | 22.500 | 7.20 | 5.14 | 9.26  | 62.61 | 156.54 |
| 1394 | 38.750 | 22.500 | 8.92 | 3.61 | 14.23 | 40.75 | 101.88 |
| 1395 | 39.000 | 22.500 | 5.38 | 2.41 | 8.35  | 69.44 | 173.59 |
| 1396 | 39.250 | 22.500 | 8.44 | 3.23 | 13.65 | 42.48 | 106.20 |
| 1397 | 39.500 | 22.500 | 6.38 | 3.57 | 9.19  | 63.09 | 157.73 |
| 1398 | 39.750 | 22.500 | 7.42 | 3.73 | 11.11 | 52.19 | 130.48 |
| 1399 | 40.000 | 22.500 | 5.63 | 3.44 | 7.82  | 74.14 | 185.35 |
| 1400 | 40.250 | 22.500 | 5.43 | 3.26 | 7.60  | 76.29 | 190.71 |
| 1401 | 40.500 | 22.500 | 6.53 | 4.74 | 8.32  | 69.69 | 174.22 |
| 1402 | 40.750 | 22.500 | 7.46 | 5.23 | 9.69  | 59.84 | 149.59 |
| 1403 | 41.000 | 22.500 | 6.66 | 3.12 | 10.20 | 56.85 | 142.12 |
| 1404 | 41.250 | 22.500 | 6.52 | 2.80 | 10.24 | 56.62 | 141.56 |
| 1405 | 41.500 | 22.500 | 5.47 | 2.99 | 7.95  | 72.93 | 182.32 |
| 1406 | 41.750 | 22.500 | 6.10 | 3.48 | 8.72  | 66.49 | 166.23 |
| 1407 | 42.000 | 22.500 | 6.89 | 3.49 | 10.29 | 56.35 | 140.87 |
| 1408 | 42.250 | 22.500 | 5.36 | 3.46 | 7.26  | 79.86 | 199.64 |
| 1409 | 42.500 | 22.500 | 6.11 | 4.10 | 8.12  | 71.40 | 178.51 |
| 1410 | 42.750 | 22.500 | 7.00 | 4.87 | 9.13  | 63.51 | 158.76 |
| 1411 | 43.000 | 22.500 | 6.14 | 4.38 | 7.90  | 73.39 | 183.47 |
| 1412 | 43.250 | 22.500 | 5.71 | 3.82 | 7.60  | 76.29 | 190.71 |
| 1413 | 43.500 | 22.500 | 6.11 | 4.05 | 8.17  | 70.97 | 177.41 |
| 1414 | 43.750 | 22.500 | 6.39 | 3.56 | 9.22  | 62.89 | 157.22 |
| 1415 | 44.000 | 22.500 | 6.47 | 2.89 | 10.05 | 57.69 | 144.24 |
| 1416 | 44.250 | 22.500 | 5.58 | 3.23 | 7.93  | 73.11 | 182.78 |
| 1417 | 44.500 | 22.500 | 6.24 | 5.91 | 6.57  | 88.24 | 220.60 |
| 1418 | 44.750 | 22.500 | 6.54 | 5.64 | 7.44  | 77.93 | 194.81 |
| 1419 | 45.000 | 22.500 | 6.45 | 5.48 | 7.42  | 78.14 | 195.34 |
| 1420 | 45.250 | 22.500 | 6.38 | 5.42 | 7.34  | 78.99 | 197.47 |
| 1421 | 45.500 | 22.500 | 6.07 | 3.53 | 8.61  | 67.34 | 168.35 |
| 1422 | 45.750 | 22.500 | 6.19 | 3.34 | 9.04  | 64.14 | 160.35 |
| 1423 | 46.000 | 22.500 | 7.99 | 3.47 | 12.51 | 46.35 | 115.88 |

|      |        |        |       |      |       |       |        |
|------|--------|--------|-------|------|-------|-------|--------|
| 1424 | 46.250 | 22.500 | 7.98  | 3.83 | 12.13 | 47.80 | 119.51 |
| 1425 | 46.500 | 22.500 | 7.52  | 5.23 | 9.81  | 59.11 | 147.76 |
| 1426 | 46.750 | 22.500 | 8.19  | 3.94 | 12.44 | 46.61 | 116.53 |
| 1427 | 47.000 | 22.500 | 6.21  | 5.58 | 6.84  | 84.76 | 211.90 |
| 1428 | 47.250 | 22.500 | 6.11  | 5.87 | 6.35  | 91.30 | 228.24 |
| 1429 | 47.500 | 22.500 | 7.06  | 3.93 | 10.19 | 56.90 | 142.25 |
| 1430 | 47.750 | 22.500 | 7.05  | 4.64 | 9.46  | 61.29 | 153.23 |
| 1431 | 48.000 | 22.500 | 8.21  | 6.52 | 9.90  | 58.57 | 146.42 |
| 1432 | 35.000 | 22.750 | 6.19  | 3.61 | 8.77  | 66.11 | 165.28 |
| 1433 | 35.250 | 22.750 | 4.98  | 2.83 | 7.13  | 81.31 | 203.28 |
| 1434 | 35.500 | 22.750 | 6.75  | 2.57 | 10.93 | 53.05 | 132.63 |
| 1435 | 35.750 | 22.750 | 5.52  | 3.57 | 7.47  | 77.61 | 194.03 |
| 1436 | 36.000 | 22.750 | 6.61  | 3.97 | 9.25  | 62.68 | 156.71 |
| 1437 | 36.250 | 22.750 | 6.99  | 4.32 | 9.66  | 60.02 | 150.06 |
| 1438 | 36.500 | 22.750 | 5.66  | 3.28 | 8.04  | 72.11 | 180.28 |
| 1439 | 36.750 | 22.750 | 5.84  | 3.41 | 8.27  | 70.11 | 175.27 |
| 1440 | 37.000 | 22.750 | 5.51  | 3.57 | 7.45  | 77.82 | 194.55 |
| 1441 | 37.250 | 22.750 | 6.09  | 2.97 | 9.21  | 62.95 | 157.39 |
| 1442 | 37.500 | 22.750 | 5.69  | 4.47 | 6.91  | 83.90 | 209.75 |
| 1443 | 37.750 | 22.750 | 5.54  | 3.53 | 7.55  | 76.79 | 191.98 |
| 1444 | 38.000 | 22.750 | 5.60  | 3.76 | 7.44  | 77.93 | 194.81 |
| 1445 | 38.250 | 22.750 | 6.61  | 3.10 | 10.12 | 57.30 | 143.24 |
| 1446 | 38.500 | 22.750 | 6.00  | 3.74 | 8.26  | 70.19 | 175.48 |
| 1447 | 38.750 | 22.750 | 7.65  | 5.66 | 9.64  | 60.15 | 150.37 |
| 1448 | 39.000 | 22.750 | 6.71  | 3.38 | 10.04 | 57.75 | 144.38 |
| 1449 | 39.250 | 22.750 | 6.90  | 3.85 | 9.95  | 58.27 | 145.68 |
| 1450 | 39.500 | 22.750 | 6.96  | 3.48 | 10.44 | 55.54 | 138.85 |
| 1451 | 39.750 | 22.750 | 6.67  | 4.33 | 9.01  | 64.35 | 160.88 |
| 1452 | 40.000 | 22.750 | 6.19  | 4.21 | 8.17  | 70.97 | 177.41 |
| 1453 | 40.250 | 22.750 | 5.52  | 2.95 | 8.09  | 71.67 | 179.17 |
| 1454 | 40.500 | 22.750 | 5.79  | 3.46 | 8.12  | 71.40 | 178.51 |
| 1455 | 40.750 | 22.750 | 8.06  | 3.77 | 12.35 | 46.95 | 117.38 |
| 1456 | 41.000 | 22.750 | 6.32  | 2.56 | 10.08 | 57.52 | 143.81 |
| 1457 | 41.250 | 22.750 | 5.63  | 3.31 | 7.95  | 72.93 | 182.32 |
| 1458 | 41.500 | 22.750 | 6.11  | 3.09 | 9.13  | 63.51 | 158.76 |
| 1459 | 41.750 | 22.750 | 7.08  | 3.63 | 10.53 | 55.07 | 137.66 |
| 1460 | 42.000 | 22.750 | 6.27  | 3.44 | 9.10  | 63.72 | 159.29 |
| 1461 | 42.250 | 22.750 | 6.51  | 3.69 | 9.33  | 62.15 | 155.36 |
| 1462 | 42.500 | 22.750 | 6.48  | 3.11 | 9.85  | 58.87 | 147.16 |
| 1463 | 42.750 | 22.750 | 7.60  | 2.59 | 12.61 | 45.98 | 114.96 |
| 1464 | 43.000 | 22.750 | 7.66  | 3.61 | 11.71 | 49.52 | 123.79 |
| 1465 | 43.250 | 22.750 | 8.28  | 3.97 | 12.59 | 46.06 | 115.14 |
| 1466 | 43.500 | 22.750 | 6.36  | 2.92 | 9.80  | 59.17 | 147.91 |
| 1467 | 43.750 | 22.750 | 6.30  | 5.95 | 6.65  | 87.18 | 217.95 |
| 1468 | 44.000 | 22.750 | 8.30  | 6.61 | 9.99  | 58.04 | 145.10 |
| 1469 | 44.250 | 22.750 | 7.97  | 5.60 | 10.34 | 56.08 | 140.19 |
| 1470 | 44.500 | 22.750 | 7.84  | 4.31 | 11.37 | 51.00 | 127.49 |
| 1471 | 44.750 | 22.750 | 8.50  | 6.06 | 10.94 | 53.00 | 132.50 |
| 1472 | 45.000 | 22.750 | 10.28 | 5.75 | 14.81 | 39.15 | 97.89  |
| 1473 | 45.250 | 22.750 | 9.88  | 5.46 | 14.30 | 40.55 | 101.38 |
| 1474 | 45.500 | 22.750 | 9.00  | 5.53 | 12.47 | 46.50 | 116.25 |
| 1475 | 45.750 | 22.750 | 11.28 | 6.95 | 15.61 | 37.15 | 92.87  |
| 1476 | 46.000 | 22.750 | 8.37  | 5.68 | 11.06 | 52.43 | 131.07 |

|      |        |        |       |      |       |       |        |
|------|--------|--------|-------|------|-------|-------|--------|
| 1477 | 46.250 | 22.750 | 10.53 | 7.39 | 13.67 | 42.42 | 106.05 |
| 1478 | 46.500 | 22.750 | 8.84  | 7.23 | 10.45 | 55.49 | 138.72 |
| 1479 | 46.750 | 22.750 | 9.83  | 7.91 | 11.75 | 49.35 | 123.37 |
| 1480 | 47.000 | 22.750 | 10.61 | 6.21 | 15.01 | 38.63 | 96.58  |
| 1481 | 47.250 | 22.750 | 8.04  | 4.50 | 11.58 | 50.07 | 125.18 |
| 1482 | 47.500 | 22.750 | 9.68  | 5.15 | 14.21 | 40.81 | 102.02 |
| 1483 | 47.750 | 22.750 | 9.57  | 5.52 | 13.62 | 42.58 | 106.44 |
| 1484 | 48.000 | 22.750 | 11.05 | 6.55 | 15.55 | 37.29 | 93.23  |
| 1485 | 35.000 | 23.000 | 7.13  | 5.76 | 8.50  | 68.21 | 170.53 |
| 1486 | 35.250 | 23.000 | 7.15  | 5.28 | 9.02  | 64.28 | 160.70 |
| 1487 | 35.500 | 23.000 | 5.93  | 4.73 | 7.13  | 81.31 | 203.28 |
| 1488 | 35.750 | 23.000 | 6.54  | 5.07 | 8.01  | 72.38 | 180.96 |
| 1489 | 36.000 | 23.000 | 6.86  | 6.01 | 7.71  | 75.20 | 187.99 |
| 1490 | 36.250 | 23.000 | 8.21  | 6.65 | 9.77  | 59.35 | 148.37 |
| 1491 | 36.500 | 23.000 | 7.46  | 4.01 | 10.91 | 53.15 | 132.87 |
| 1492 | 36.750 | 23.000 | 6.99  | 4.29 | 9.69  | 59.84 | 149.59 |
| 1493 | 37.000 | 23.000 | 6.42  | 4.45 | 8.39  | 69.11 | 172.76 |
| 1494 | 37.250 | 23.000 | 6.82  | 5.00 | 8.64  | 67.11 | 167.77 |
| 1495 | 37.500 | 23.000 | 7.57  | 5.31 | 9.83  | 58.99 | 147.46 |
| 1496 | 37.750 | 23.000 | 6.47  | 5.47 | 7.47  | 77.61 | 194.03 |
| 1497 | 38.000 | 23.000 | 6.88  | 5.70 | 8.06  | 71.93 | 179.83 |
| 1498 | 38.250 | 23.000 | 7.29  | 5.80 | 8.78  | 66.04 | 165.09 |
| 1499 | 38.500 | 23.000 | 6.26  | 5.06 | 7.46  | 77.72 | 194.29 |
| 1500 | 38.750 | 23.000 | 6.84  | 5.20 | 8.48  | 68.37 | 170.93 |
| 1501 | 39.000 | 23.000 | 6.57  | 5.42 | 7.72  | 75.10 | 187.75 |
| 1502 | 39.250 | 23.000 | 6.94  | 4.94 | 8.94  | 64.86 | 162.14 |
| 1503 | 39.500 | 23.000 | 6.27  | 5.72 | 6.82  | 85.01 | 212.52 |
| 1504 | 39.750 | 23.000 | 5.39  | 4.75 | 6.03  | 96.14 | 240.34 |
| 1505 | 40.000 | 23.000 | 6.39  | 6.70 | 6.08  | 95.35 | 238.37 |
| 1506 | 40.250 | 23.000 | 6.84  | 7.04 | 6.64  | 87.31 | 218.27 |
| 1507 | 40.500 | 23.000 | 6.50  | 6.21 | 6.79  | 85.38 | 213.46 |
| 1508 | 40.750 | 23.000 | 6.17  | 5.20 | 7.14  | 81.20 | 203.00 |
| 1509 | 41.000 | 23.000 | 6.04  | 3.91 | 8.17  | 70.97 | 177.41 |
| 1510 | 41.250 | 23.000 | 6.70  | 5.66 | 7.74  | 74.91 | 187.27 |
| 1511 | 41.500 | 23.000 | 8.48  | 5.35 | 11.61 | 49.94 | 124.86 |
| 1512 | 41.750 | 23.000 | 8.08  | 5.06 | 11.10 | 52.24 | 130.60 |
| 1513 | 42.000 | 23.000 | 7.20  | 5.13 | 9.27  | 62.55 | 156.37 |
| 1514 | 42.250 | 23.000 | 9.48  | 6.55 | 12.41 | 46.73 | 116.81 |
| 1515 | 42.500 | 23.000 | 6.57  | 5.28 | 7.86  | 73.76 | 184.41 |
| 1516 | 42.750 | 23.000 | 6.19  | 4.33 | 8.05  | 72.02 | 180.06 |
| 1517 | 43.000 | 23.000 | 8.33  | 7.54 | 9.12  | 63.58 | 158.94 |
| 1518 | 43.250 | 23.000 | 8.37  | 4.40 | 12.34 | 46.99 | 117.48 |
| 1519 | 43.500 | 23.000 | 6.41  | 5.68 | 7.14  | 81.20 | 203.00 |
| 1520 | 43.750 | 23.000 | 8.44  | 5.89 | 10.99 | 52.76 | 131.90 |
| 1521 | 44.000 | 23.000 | 8.17  | 4.91 | 11.43 | 50.73 | 126.83 |
| 1522 | 44.250 | 23.000 | 8.06  | 6.39 | 9.73  | 59.59 | 148.98 |
| 1523 | 44.500 | 23.000 | 6.11  | 4.60 | 7.62  | 76.09 | 190.21 |
| 1524 | 44.750 | 23.000 | 7.04  | 6.73 | 7.35  | 78.88 | 197.20 |
| 1525 | 45.000 | 23.000 | 7.99  | 5.88 | 10.10 | 57.41 | 143.52 |
| 1526 | 45.250 | 23.000 | 7.67  | 5.81 | 9.53  | 60.84 | 152.10 |
| 1527 | 45.500 | 23.000 | 7.78  | 4.77 | 10.79 | 53.74 | 134.35 |
| 1528 | 45.750 | 23.000 | 6.03  | 4.59 | 7.47  | 77.61 | 194.03 |
| 1529 | 46.000 | 23.000 | 7.05  | 7.04 | 7.06  | 82.12 | 205.30 |

|      |        |        |      |      |       |       |        |
|------|--------|--------|------|------|-------|-------|--------|
| 1530 | 46.250 | 23.000 | 6.53 | 5.19 | 7.87  | 73.67 | 184.17 |
| 1531 | 46.500 | 23.000 | 6.23 | 5.54 | 6.92  | 83.78 | 209.45 |
| 1532 | 46.750 | 23.000 | 9.18 | 4.99 | 13.37 | 43.37 | 108.43 |
| 1533 | 47.000 | 23.000 | 8.45 | 5.58 | 11.32 | 51.22 | 128.06 |
| 1534 | 47.250 | 23.000 | 8.86 | 4.68 | 13.04 | 44.47 | 111.17 |
| 1535 | 47.500 | 23.000 | 7.07 | 5.58 | 8.56  | 67.73 | 169.33 |
| 1536 | 47.750 | 23.000 | 5.72 | 5.23 | 6.21  | 93.35 | 233.38 |
| 1537 | 48.000 | 23.000 | 5.45 | 3.69 | 7.21  | 80.49 | 201.22 |
| 1538 | 35.000 | 23.250 | 6.49 | 4.70 | 8.28  | 70.02 | 175.06 |
| 1539 | 35.250 | 23.250 | 7.47 | 5.96 | 8.98  | 64.57 | 161.42 |
| 1540 | 35.500 | 23.250 | 5.98 | 5.03 | 6.93  | 83.66 | 209.14 |
| 1541 | 35.750 | 23.250 | 5.79 | 4.66 | 6.92  | 83.78 | 209.45 |
| 1542 | 36.000 | 23.250 | 5.60 | 5.05 | 6.15  | 94.26 | 235.66 |
| 1543 | 36.250 | 23.250 | 5.74 | 5.32 | 6.16  | 94.11 | 235.28 |
| 1544 | 36.500 | 23.250 | 6.59 | 6.86 | 6.32  | 91.73 | 229.32 |
| 1545 | 36.750 | 23.250 | 5.82 | 5.23 | 6.41  | 90.44 | 226.10 |
| 1546 | 37.000 | 23.250 | 5.79 | 5.44 | 6.14  | 94.42 | 236.04 |
| 1547 | 37.250 | 23.250 | 6.00 | 4.76 | 7.24  | 80.08 | 200.19 |
| 1548 | 37.500 | 23.250 | 6.83 | 6.00 | 7.66  | 75.69 | 189.22 |
| 1549 | 37.750 | 23.250 | 6.68 | 6.23 | 7.13  | 81.31 | 203.28 |
| 1550 | 38.000 | 23.250 | 6.67 | 5.96 | 7.38  | 78.56 | 196.40 |
| 1551 | 38.250 | 23.250 | 6.57 | 5.40 | 7.74  | 74.91 | 187.27 |
| 1552 | 38.500 | 23.250 | 6.42 | 6.35 | 6.49  | 89.33 | 223.32 |
| 1553 | 38.750 | 23.250 | 6.41 | 5.92 | 6.90  | 84.02 | 210.05 |
| 1554 | 39.000 | 23.250 | 6.47 | 6.01 | 6.93  | 83.66 | 209.14 |
| 1555 | 39.250 | 23.250 | 6.37 | 5.98 | 6.76  | 85.76 | 214.40 |
| 1556 | 39.500 | 23.250 | 5.85 | 4.98 | 6.72  | 86.27 | 215.68 |
| 1557 | 39.750 | 23.250 | 5.52 | 4.81 | 6.23  | 93.05 | 232.63 |
| 1558 | 40.000 | 23.250 | 5.50 | 4.89 | 6.11  | 94.88 | 237.20 |
| 1559 | 40.250 | 23.250 | 6.11 | 6.24 | 5.98  | 96.94 | 242.35 |
| 1560 | 40.500 | 23.250 | 6.10 | 6.26 | 5.94  | 97.59 | 243.98 |
| 1561 | 40.750 | 23.250 | 5.65 | 5.25 | 6.05  | 95.82 | 239.55 |
| 1562 | 41.000 | 23.250 | 5.56 | 4.98 | 6.14  | 94.42 | 236.04 |
| 1563 | 41.250 | 23.250 | 5.51 | 5.07 | 5.95  | 97.43 | 243.57 |
| 1564 | 41.500 | 23.250 | 6.91 | 7.21 | 6.61  | 87.71 | 219.27 |
| 1565 | 41.750 | 23.250 | 6.72 | 5.35 | 8.09  | 71.67 | 179.17 |
| 1566 | 42.000 | 23.250 | 7.00 | 5.53 | 8.47  | 68.45 | 171.13 |
| 1567 | 42.250 | 23.250 | 6.69 | 4.92 | 8.46  | 68.53 | 171.33 |
| 1568 | 42.500 | 23.250 | 5.96 | 4.02 | 7.90  | 73.39 | 183.47 |
| 1569 | 42.750 | 23.250 | 5.84 | 4.96 | 6.72  | 86.27 | 215.68 |
| 1570 | 43.000 | 23.250 | 6.07 | 5.33 | 6.81  | 85.13 | 212.83 |
| 1571 | 43.250 | 23.250 | 6.28 | 5.66 | 6.90  | 84.02 | 210.05 |
| 1572 | 43.500 | 23.250 | 6.30 | 5.99 | 6.61  | 87.71 | 219.27 |
| 1573 | 43.750 | 23.250 | 6.69 | 4.76 | 8.62  | 67.26 | 168.15 |
| 1574 | 44.000 | 23.250 | 6.15 | 5.53 | 6.77  | 85.63 | 214.09 |
| 1575 | 44.250 | 23.250 | 5.89 | 4.97 | 6.81  | 85.13 | 212.83 |
| 1576 | 44.500 | 23.250 | 6.72 | 5.90 | 7.54  | 76.89 | 192.23 |
| 1577 | 44.750 | 23.250 | 6.30 | 5.72 | 6.88  | 84.27 | 210.66 |
| 1578 | 45.000 | 23.250 | 6.67 | 6.19 | 7.15  | 81.08 | 202.71 |
| 1579 | 45.250 | 23.250 | 7.06 | 5.98 | 8.14  | 71.23 | 178.07 |
| 1580 | 45.500 | 23.250 | 7.27 | 5.52 | 9.02  | 64.28 | 160.70 |
| 1581 | 45.750 | 23.250 | 5.88 | 5.35 | 6.41  | 90.44 | 226.10 |
| 1582 | 46.000 | 23.250 | 7.20 | 5.15 | 9.25  | 62.68 | 156.71 |

|      |        |        |      |      |       |       |        |
|------|--------|--------|------|------|-------|-------|--------|
| 1583 | 46.250 | 23.250 | 6.78 | 6.01 | 7.55  | 76.79 | 191.98 |
| 1584 | 46.500 | 23.250 | 6.69 | 5.89 | 7.49  | 77.41 | 193.51 |
| 1585 | 46.750 | 23.250 | 6.30 | 5.07 | 7.53  | 76.99 | 192.49 |
| 1586 | 47.000 | 23.250 | 7.36 | 5.80 | 8.92  | 65.00 | 162.50 |
| 1587 | 47.250 | 23.250 | 6.40 | 5.19 | 7.61  | 76.19 | 190.46 |
| 1588 | 47.500 | 23.250 | 7.18 | 4.82 | 9.54  | 60.78 | 151.94 |
| 1589 | 47.750 | 23.250 | 6.73 | 4.21 | 9.25  | 62.68 | 156.71 |
| 1590 | 48.000 | 23.250 | 6.92 | 5.34 | 8.50  | 68.21 | 170.53 |
| 1591 | 35.000 | 23.500 | 7.84 | 4.99 | 10.69 | 54.24 | 135.60 |
| 1592 | 35.250 | 23.500 | 7.50 | 4.84 | 10.16 | 57.07 | 142.67 |
| 1593 | 35.500 | 23.500 | 6.17 | 5.31 | 7.03  | 82.47 | 206.17 |
| 1594 | 35.750 | 23.500 | 6.04 | 4.83 | 7.25  | 79.97 | 199.92 |
| 1595 | 36.000 | 23.500 | 6.70 | 4.94 | 8.46  | 68.53 | 171.33 |
| 1596 | 36.250 | 23.500 | 8.48 | 4.52 | 12.44 | 46.61 | 116.53 |
| 1597 | 36.500 | 23.500 | 8.08 | 4.44 | 11.72 | 49.48 | 123.69 |
| 1598 | 36.750 | 23.500 | 7.20 | 5.29 | 9.11  | 63.65 | 159.11 |
| 1599 | 37.000 | 23.500 | 9.48 | 5.66 | 13.30 | 43.60 | 109.00 |
| 1600 | 37.250 | 23.500 | 6.57 | 5.29 | 7.85  | 73.86 | 184.64 |
| 1601 | 37.500 | 23.500 | 8.73 | 6.39 | 11.07 | 52.38 | 130.95 |
| 1602 | 37.750 | 23.500 | 7.04 | 5.54 | 8.54  | 67.89 | 169.73 |
| 1603 | 38.000 | 23.500 | 8.03 | 5.40 | 10.66 | 54.39 | 135.98 |
| 1604 | 38.250 | 23.500 | 8.81 | 5.06 | 12.56 | 46.17 | 115.42 |
| 1605 | 38.500 | 23.500 | 6.24 | 4.81 | 7.67  | 75.59 | 188.97 |
| 1606 | 38.750 | 23.500 | 7.88 | 5.39 | 10.37 | 55.91 | 139.79 |
| 1607 | 39.000 | 23.500 | 7.77 | 5.66 | 9.88  | 58.69 | 146.72 |
| 1608 | 39.250 | 23.500 | 9.25 | 6.19 | 12.31 | 47.10 | 117.76 |
| 1609 | 39.500 | 23.500 | 8.09 | 5.70 | 10.48 | 55.33 | 138.32 |
| 1610 | 39.750 | 23.500 | 8.31 | 5.80 | 10.82 | 53.59 | 133.97 |
| 1611 | 40.000 | 23.500 | 7.88 | 5.35 | 10.41 | 55.70 | 139.25 |
| 1612 | 40.250 | 23.500 | 6.07 | 5.15 | 6.99  | 82.94 | 207.35 |
| 1613 | 40.500 | 23.500 | 7.10 | 6.01 | 8.19  | 70.79 | 176.98 |
| 1614 | 40.750 | 23.500 | 5.95 | 5.89 | 6.01  | 96.46 | 241.14 |
| 1615 | 41.000 | 23.500 | 6.16 | 5.07 | 7.25  | 79.97 | 199.92 |
| 1616 | 41.250 | 23.500 | 6.91 | 5.80 | 8.02  | 72.29 | 180.73 |
| 1617 | 41.500 | 23.500 | 5.57 | 4.69 | 6.45  | 89.88 | 224.70 |
| 1618 | 41.750 | 23.500 | 6.36 | 5.40 | 7.32  | 79.20 | 198.01 |
| 1619 | 42.000 | 23.500 | 5.71 | 4.21 | 7.21  | 80.41 | 201.03 |
| 1620 | 42.250 | 23.500 | 6.52 | 2.80 | 10.24 | 56.62 | 141.56 |
| 1621 | 42.500 | 23.500 | 5.47 | 2.99 | 7.95  | 72.93 | 182.32 |
| 1622 | 42.750 | 23.500 | 6.10 | 3.48 | 8.72  | 66.49 | 166.23 |
| 1623 | 43.000 | 23.500 | 6.89 | 3.49 | 10.29 | 56.35 | 140.87 |
| 1624 | 43.250 | 23.500 | 5.36 | 3.46 | 7.26  | 79.86 | 199.64 |
| 1625 | 43.500 | 23.500 | 6.11 | 4.10 | 8.12  | 71.40 | 178.51 |
| 1626 | 43.750 | 23.500 | 7.00 | 4.87 | 9.13  | 63.51 | 158.76 |
| 1627 | 44.000 | 23.500 | 6.14 | 4.38 | 7.90  | 73.39 | 183.47 |
| 1628 | 44.250 | 23.500 | 5.71 | 3.82 | 7.60  | 76.29 | 190.71 |
| 1629 | 44.500 | 23.500 | 6.11 | 4.05 | 8.17  | 70.97 | 177.41 |
| 1630 | 44.750 | 23.500 | 6.39 | 3.56 | 9.22  | 62.89 | 157.22 |
| 1631 | 45.000 | 23.500 | 6.47 | 2.89 | 10.05 | 57.69 | 144.24 |
| 1632 | 45.250 | 23.500 | 5.58 | 3.23 | 7.93  | 73.11 | 182.78 |
| 1633 | 45.500 | 23.500 | 6.24 | 5.91 | 6.57  | 88.24 | 220.60 |
| 1634 | 45.750 | 23.500 | 6.54 | 5.64 | 7.44  | 77.93 | 194.81 |
| 1635 | 46.000 | 23.500 | 6.45 | 5.48 | 7.42  | 78.14 | 195.34 |

|      |        |        |      |      |       |       |        |
|------|--------|--------|------|------|-------|-------|--------|
| 1636 | 46.250 | 23.500 | 6.38 | 5.42 | 7.34  | 78.99 | 197.47 |
| 1637 | 46.500 | 23.500 | 6.07 | 3.53 | 8.61  | 67.34 | 168.35 |
| 1638 | 46.750 | 23.500 | 6.19 | 3.34 | 9.04  | 64.14 | 160.35 |
| 1639 | 47.000 | 23.500 | 7.99 | 3.47 | 12.51 | 46.35 | 115.88 |
| 1640 | 47.250 | 23.500 | 7.98 | 3.83 | 12.13 | 47.80 | 119.51 |
| 1641 | 47.500 | 23.500 | 6.40 | 3.54 | 9.26  | 62.61 | 156.54 |
| 1642 | 47.750 | 23.500 | 8.51 | 4.48 | 12.54 | 46.24 | 115.60 |
| 1643 | 48.000 | 23.500 | 5.89 | 3.92 | 7.86  | 73.76 | 184.41 |
| 1644 | 35.000 | 23.750 | 5.54 | 3.50 | 7.58  | 76.49 | 191.22 |
| 1645 | 35.250 | 23.750 | 9.20 | 5.07 | 13.33 | 43.50 | 108.75 |
| 1646 | 35.500 | 23.750 | 7.47 | 3.42 | 11.52 | 50.33 | 125.84 |
| 1647 | 35.750 | 23.750 | 8.50 | 3.53 | 13.47 | 43.05 | 107.62 |
| 1648 | 36.000 | 23.750 | 6.75 | 3.53 | 9.97  | 58.16 | 145.39 |
| 1649 | 36.250 | 23.750 | 5.36 | 3.37 | 7.35  | 78.88 | 197.20 |
| 1650 | 36.500 | 23.750 | 5.77 | 4.29 | 7.25  | 79.97 | 199.92 |
| 1651 | 36.750 | 23.750 | 5.62 | 3.48 | 7.76  | 74.71 | 186.78 |
| 1652 | 37.000 | 23.750 | 5.54 | 3.89 | 7.19  | 80.63 | 201.58 |
| 1653 | 37.250 | 23.750 | 6.19 | 3.61 | 8.77  | 66.11 | 165.28 |
| 1654 | 37.500 | 23.750 | 4.98 | 2.83 | 7.13  | 81.31 | 203.28 |
| 1655 | 37.750 | 23.750 | 6.01 | 3.46 | 8.56  | 67.73 | 169.33 |
| 1656 | 38.000 | 23.750 | 5.95 | 4.29 | 7.61  | 76.19 | 190.46 |
| 1657 | 38.250 | 23.750 | 5.36 | 3.95 | 6.77  | 85.63 | 214.09 |
| 1658 | 38.500 | 23.750 | 6.34 | 3.99 | 8.69  | 66.72 | 166.80 |
| 1659 | 38.750 | 23.750 | 6.53 | 4.23 | 8.83  | 65.66 | 164.16 |
| 1660 | 39.000 | 23.750 | 7.58 | 3.93 | 11.23 | 51.63 | 129.08 |
| 1661 | 39.250 | 23.750 | 5.86 | 3.68 | 8.04  | 72.11 | 180.28 |
| 1662 | 39.500 | 23.750 | 6.53 | 3.11 | 9.95  | 58.27 | 145.68 |
| 1663 | 39.750 | 23.750 | 7.31 | 4.29 | 10.33 | 56.13 | 140.33 |
| 1664 | 40.000 | 23.750 | 5.62 | 3.85 | 7.39  | 78.45 | 196.13 |
| 1665 | 40.250 | 23.750 | 6.18 | 5.04 | 7.32  | 79.20 | 198.01 |
| 1666 | 40.500 | 23.750 | 5.55 | 4.65 | 6.45  | 89.88 | 224.70 |
| 1667 | 40.750 | 23.750 | 7.21 | 4.40 | 10.02 | 57.87 | 144.67 |
| 1668 | 41.000 | 23.750 | 6.79 | 4.59 | 8.99  | 64.49 | 161.24 |
| 1669 | 41.250 | 23.750 | 6.70 | 3.83 | 9.57  | 60.59 | 151.47 |
| 1670 | 41.500 | 23.750 | 6.04 | 3.46 | 8.62  | 67.26 | 168.15 |
| 1671 | 41.750 | 23.750 | 6.00 | 3.27 | 8.73  | 66.41 | 166.04 |
| 1672 | 42.000 | 23.750 | 6.00 | 3.74 | 8.26  | 70.19 | 175.48 |
| 1673 | 42.250 | 23.750 | 7.65 | 5.66 | 9.64  | 60.15 | 150.37 |
| 1674 | 42.500 | 23.750 | 6.71 | 3.38 | 10.04 | 57.75 | 144.38 |
| 1675 | 42.750 | 23.750 | 6.90 | 3.85 | 9.95  | 58.27 | 145.68 |
| 1676 | 43.000 | 23.750 | 6.96 | 3.48 | 10.44 | 55.54 | 138.85 |
| 1677 | 43.250 | 23.750 | 6.67 | 4.33 | 9.01  | 64.35 | 160.88 |
| 1678 | 43.500 | 23.750 | 6.19 | 4.21 | 8.17  | 70.97 | 177.41 |
| 1679 | 43.750 | 23.750 | 5.52 | 2.95 | 8.09  | 71.67 | 179.17 |
| 1680 | 44.000 | 23.750 | 5.79 | 3.46 | 8.12  | 71.40 | 178.51 |
| 1681 | 44.250 | 23.750 | 8.06 | 3.77 | 12.35 | 46.95 | 117.38 |
| 1682 | 44.500 | 23.750 | 6.32 | 2.56 | 10.08 | 57.52 | 143.81 |
| 1683 | 44.750 | 23.750 | 5.63 | 3.31 | 7.95  | 72.93 | 182.32 |
| 1684 | 45.000 | 23.750 | 6.11 | 3.09 | 9.13  | 63.51 | 158.76 |
| 1685 | 45.250 | 23.750 | 7.08 | 3.63 | 10.53 | 55.07 | 137.66 |
| 1686 | 45.500 | 23.750 | 6.27 | 3.44 | 9.10  | 63.72 | 159.29 |
| 1687 | 45.750 | 23.750 | 6.51 | 3.69 | 9.33  | 62.15 | 155.36 |
| 1688 | 46.000 | 23.750 | 6.48 | 3.11 | 9.85  | 58.87 | 147.16 |



|      |        |        |       |      |       |       |        |
|------|--------|--------|-------|------|-------|-------|--------|
| 1689 | 46.250 | 23.750 | 7.60  | 2.59 | 12.61 | 45.98 | 114.96 |
| 1690 | 46.500 | 23.750 | 7.66  | 3.61 | 11.71 | 49.52 | 123.79 |
| 1691 | 46.750 | 23.750 | 8.28  | 3.97 | 12.59 | 46.06 | 115.14 |
| 1692 | 47.000 | 23.750 | 6.36  | 2.92 | 9.80  | 59.17 | 147.91 |
| 1693 | 47.250 | 23.750 | 6.30  | 5.95 | 6.65  | 87.18 | 217.95 |
| 1694 | 47.500 | 23.750 | 5.57  | 3.90 | 7.24  | 80.08 | 200.19 |
| 1695 | 47.750 | 23.750 | 5.87  | 4.19 | 7.55  | 76.79 | 191.98 |
| 1696 | 48.000 | 23.750 | 5.66  | 3.99 | 7.33  | 79.09 | 197.74 |
| 1697 | 35.000 | 24.000 | 6.40  | 3.93 | 8.87  | 65.37 | 163.42 |
| 1698 | 35.250 | 24.000 | 5.79  | 3.64 | 7.94  | 73.02 | 182.55 |
| 1699 | 35.500 | 24.000 | 6.11  | 4.04 | 8.18  | 70.88 | 177.20 |
| 1700 | 35.750 | 24.000 | 6.85  | 4.89 | 8.81  | 65.81 | 164.53 |
| 1701 | 36.000 | 24.000 | 6.01  | 4.27 | 7.75  | 74.81 | 187.02 |
| 1702 | 36.250 | 24.000 | 6.57  | 3.69 | 9.45  | 61.36 | 153.39 |
| 1703 | 36.500 | 24.000 | 5.98  | 3.58 | 8.38  | 69.19 | 172.97 |
| 1704 | 36.750 | 24.000 | 6.11  | 3.66 | 8.56  | 67.73 | 169.33 |
| 1705 | 37.000 | 24.000 | 6.13  | 3.93 | 8.33  | 69.60 | 174.01 |
| 1706 | 37.250 | 24.000 | 6.28  | 3.73 | 8.83  | 65.66 | 164.16 |
| 1707 | 37.500 | 24.000 | 6.10  | 4.31 | 7.89  | 73.48 | 183.71 |
| 1708 | 37.750 | 24.000 | 6.00  | 3.19 | 8.81  | 65.81 | 164.53 |
| 1709 | 38.000 | 24.000 | 6.43  | 3.22 | 9.64  | 60.15 | 150.37 |
| 1710 | 38.250 | 24.000 | 6.48  | 4.30 | 8.66  | 66.95 | 167.38 |
| 1711 | 38.500 | 24.000 | 6.21  | 3.74 | 8.68  | 66.80 | 166.99 |
| 1712 | 38.750 | 24.000 | 5.86  | 4.02 | 7.70  | 75.30 | 188.24 |
| 1713 | 39.000 | 24.000 | 7.09  | 5.36 | 8.82  | 65.74 | 164.34 |
| 1714 | 39.250 | 24.000 | 6.69  | 4.87 | 8.51  | 68.13 | 170.33 |
| 1715 | 39.500 | 24.000 | 5.10  | 3.11 | 7.09  | 81.77 | 204.43 |
| 1716 | 39.750 | 24.000 | 5.72  | 3.69 | 7.75  | 74.81 | 187.02 |
| 1717 | 40.000 | 24.000 | 5.46  | 3.65 | 7.27  | 79.75 | 199.37 |
| 1718 | 40.250 | 24.000 | 6.22  | 4.07 | 8.37  | 69.27 | 173.18 |
| 1719 | 40.500 | 24.000 | 6.77  | 4.71 | 8.83  | 65.66 | 164.16 |
| 1720 | 40.750 | 24.000 | 8.82  | 6.32 | 11.32 | 51.22 | 128.06 |
| 1721 | 41.000 | 24.000 | 7.28  | 4.69 | 9.87  | 58.75 | 146.87 |
| 1722 | 41.250 | 24.000 | 7.81  | 5.19 | 10.43 | 55.59 | 138.98 |
| 1723 | 41.500 | 24.000 | 8.64  | 5.60 | 11.68 | 49.64 | 124.11 |
| 1724 | 41.750 | 24.000 | 8.37  | 5.82 | 10.92 | 53.10 | 132.75 |
| 1725 | 42.000 | 24.000 | 8.74  | 5.34 | 12.14 | 47.76 | 119.41 |
| 1726 | 42.250 | 24.000 | 8.04  | 4.50 | 11.58 | 50.07 | 125.18 |
| 1727 | 42.500 | 24.000 | 9.68  | 5.15 | 14.21 | 40.81 | 102.02 |
| 1728 | 42.750 | 24.000 | 9.57  | 5.52 | 13.62 | 42.58 | 106.44 |
| 1729 | 43.000 | 24.000 | 11.05 | 6.55 | 15.55 | 37.29 | 93.23  |
| 1730 | 43.250 | 24.000 | 9.89  | 6.23 | 13.55 | 42.79 | 106.99 |
| 1731 | 43.500 | 24.000 | 10.11 | 6.09 | 14.13 | 41.04 | 102.60 |
| 1732 | 43.750 | 24.000 | 9.68  | 5.90 | 13.46 | 43.08 | 107.70 |
| 1733 | 44.000 | 24.000 | 7.87  | 5.74 | 10.00 | 57.98 | 144.96 |
| 1734 | 44.250 | 24.000 | 8.90  | 5.98 | 11.82 | 49.06 | 122.64 |
| 1735 | 44.500 | 24.000 | 7.69  | 5.98 | 9.40  | 61.68 | 154.21 |
| 1736 | 44.750 | 24.000 | 7.46  | 6.09 | 8.83  | 65.66 | 164.16 |
| 1737 | 45.000 | 24.000 | 7.57  | 5.80 | 9.34  | 62.08 | 155.20 |
| 1738 | 45.250 | 24.000 | 8.17  | 5.89 | 10.45 | 55.49 | 138.72 |
| 1739 | 45.500 | 24.000 | 8.07  | 5.62 | 10.52 | 55.12 | 137.79 |
| 1740 | 45.750 | 24.000 | 7.51  | 4.55 | 10.47 | 55.38 | 138.45 |
| 1741 | 46.000 | 24.000 | 7.99  | 4.73 | 11.25 | 51.54 | 128.85 |

|      |        |        |       |      |       |        |        |
|------|--------|--------|-------|------|-------|--------|--------|
| 1742 | 46.250 | 24.000 | 10.13 | 7.94 | 12.32 | 47.07  | 117.67 |
| 1743 | 46.500 | 24.000 | 10.17 | 4.80 | 15.54 | 37.32  | 93.29  |
| 1744 | 46.750 | 24.000 | 8.21  | 6.08 | 10.34 | 56.08  | 140.19 |
| 1745 | 47.000 | 24.000 | 10.24 | 6.29 | 14.19 | 40.87  | 102.16 |
| 1746 | 47.250 | 24.000 | 9.97  | 5.31 | 14.63 | 39.64  | 99.09  |
| 1747 | 47.500 | 24.000 | 9.86  | 6.79 | 12.93 | 44.85  | 112.12 |
| 1748 | 47.750 | 24.000 | 7.91  | 5.00 | 10.82 | 53.59  | 133.97 |
| 1749 | 48.000 | 24.000 | 8.84  | 7.13 | 10.55 | 54.96  | 137.40 |
| 1750 | 35.000 | 24.250 | 6.27  | 5.72 | 6.82  | 85.01  | 212.52 |
| 1751 | 35.250 | 24.250 | 5.39  | 4.75 | 6.03  | 96.14  | 240.34 |
| 1752 | 35.500 | 24.250 | 6.39  | 6.70 | 6.08  | 95.35  | 238.37 |
| 1753 | 35.750 | 24.250 | 6.84  | 7.04 | 6.64  | 87.31  | 218.27 |
| 1754 | 36.000 | 24.250 | 6.50  | 6.21 | 6.79  | 85.38  | 213.46 |
| 1755 | 36.250 | 24.250 | 6.17  | 5.20 | 7.14  | 81.20  | 203.00 |
| 1756 | 36.500 | 24.250 | 6.04  | 3.91 | 8.17  | 70.97  | 177.41 |
| 1757 | 36.750 | 24.250 | 6.70  | 5.66 | 7.74  | 74.91  | 187.27 |
| 1758 | 37.000 | 24.250 | 8.48  | 5.35 | 11.61 | 49.94  | 124.86 |
| 1759 | 37.250 | 24.250 | 8.08  | 5.06 | 11.10 | 52.24  | 130.60 |
| 1760 | 37.500 | 24.250 | 7.20  | 5.13 | 9.27  | 62.55  | 156.37 |
| 1761 | 37.750 | 24.250 | 9.48  | 6.55 | 12.41 | 46.73  | 116.81 |
| 1762 | 38.000 | 24.250 | 6.57  | 5.28 | 7.86  | 73.76  | 184.41 |
| 1763 | 38.250 | 24.250 | 8.73  | 6.99 | 10.47 | 55.38  | 138.45 |
| 1764 | 38.500 | 24.250 | 7.04  | 6.83 | 7.25  | 79.97  | 199.92 |
| 1765 | 38.750 | 24.250 | 8.03  | 7.51 | 8.55  | 67.81  | 169.53 |
| 1766 | 39.000 | 24.250 | 8.81  | 5.81 | 11.81 | 49.10  | 122.75 |
| 1767 | 39.250 | 24.250 | 6.24  | 4.10 | 8.38  | 69.19  | 172.97 |
| 1768 | 39.500 | 24.250 | 7.88  | 4.75 | 11.01 | 52.67  | 131.66 |
| 1769 | 39.750 | 24.250 | 7.77  | 5.12 | 10.42 | 55.65  | 139.12 |
| 1770 | 40.000 | 24.250 | 9.25  | 6.15 | 12.35 | 46.95  | 117.38 |
| 1771 | 40.250 | 24.250 | 8.09  | 5.83 | 10.35 | 56.02  | 140.06 |
| 1772 | 40.500 | 24.250 | 8.31  | 5.69 | 10.93 | 53.05  | 132.63 |
| 1773 | 40.750 | 24.250 | 7.88  | 5.50 | 10.26 | 56.51  | 141.28 |
| 1774 | 41.000 | 24.250 | 6.07  | 5.34 | 6.80  | 85.26  | 213.14 |
| 1775 | 41.250 | 24.250 | 7.10  | 5.58 | 8.62  | 67.26  | 168.15 |
| 1776 | 41.500 | 24.250 | 5.89  | 5.58 | 6.20  | 93.50  | 233.76 |
| 1777 | 41.750 | 24.250 | 5.66  | 5.69 | 5.63  | 102.96 | 257.41 |
| 1778 | 42.000 | 24.250 | 5.77  | 5.40 | 6.14  | 94.42  | 236.04 |
| 1779 | 42.250 | 24.250 | 6.37  | 5.49 | 7.25  | 79.97  | 199.92 |
| 1780 | 42.500 | 24.250 | 6.23  | 5.54 | 6.92  | 83.78  | 209.45 |
| 1781 | 42.750 | 24.250 | 9.18  | 4.99 | 13.37 | 43.37  | 108.43 |
| 1782 | 43.000 | 24.250 | 8.45  | 5.58 | 11.32 | 51.22  | 128.06 |
| 1783 | 43.250 | 24.250 | 8.86  | 4.68 | 13.04 | 44.47  | 111.17 |
| 1784 | 43.500 | 24.250 | 7.07  | 5.58 | 8.56  | 67.73  | 169.33 |
| 1785 | 43.750 | 24.250 | 5.72  | 5.23 | 6.21  | 93.35  | 233.38 |
| 1786 | 44.000 | 24.250 | 5.45  | 3.69 | 7.21  | 80.49  | 201.22 |
| 1787 | 44.250 | 24.250 | 6.68  | 5.26 | 8.10  | 71.58  | 178.95 |
| 1788 | 44.500 | 24.250 | 5.35  | 4.96 | 5.74  | 100.99 | 252.48 |
| 1789 | 44.750 | 24.250 | 6.97  | 6.01 | 7.93  | 73.11  | 182.78 |
| 1790 | 45.000 | 24.250 | 5.62  | 5.24 | 6.00  | 96.62  | 241.55 |
| 1791 | 45.250 | 24.250 | 6.06  | 5.30 | 6.82  | 85.01  | 212.52 |
| 1792 | 45.500 | 24.250 | 6.28  | 4.09 | 8.47  | 68.45  | 171.13 |
| 1793 | 45.750 | 24.250 | 5.99  | 4.47 | 7.51  | 77.20  | 193.00 |
| 1794 | 46.000 | 24.250 | 6.76  | 4.64 | 8.88  | 65.29  | 163.23 |

|      |        |        |      |      |       |       |        |
|------|--------|--------|------|------|-------|-------|--------|
| 1795 | 46.250 | 24.250 | 6.26 | 6.10 | 6.42  | 90.30 | 225.75 |
| 1796 | 46.500 | 24.250 | 6.38 | 6.27 | 6.49  | 89.33 | 223.32 |
| 1797 | 46.750 | 24.250 | 5.86 | 4.95 | 6.77  | 85.66 | 214.15 |
| 1798 | 47.000 | 24.250 | 6.43 | 6.35 | 6.51  | 89.05 | 222.63 |
| 1799 | 47.250 | 24.250 | 6.40 | 5.91 | 6.89  | 84.14 | 210.36 |
| 1800 | 47.500 | 24.250 | 6.11 | 5.25 | 6.97  | 83.18 | 207.94 |
| 1801 | 47.750 | 24.250 | 6.43 | 5.77 | 7.09  | 81.78 | 204.46 |
| 1802 | 48.000 | 24.250 | 6.05 | 5.39 | 6.71  | 86.40 | 216.00 |
| 1803 | 35.000 | 24.500 | 6.67 | 5.96 | 7.38  | 78.56 | 196.40 |
| 1804 | 35.250 | 24.500 | 6.57 | 5.40 | 7.74  | 74.91 | 187.27 |
| 1805 | 35.500 | 24.500 | 6.42 | 6.35 | 6.49  | 89.33 | 223.32 |
| 1806 | 35.750 | 24.500 | 6.41 | 5.92 | 6.90  | 84.02 | 210.05 |
| 1807 | 36.000 | 24.500 | 6.47 | 6.01 | 6.93  | 83.66 | 209.14 |
| 1808 | 36.250 | 24.500 | 6.37 | 5.98 | 6.76  | 85.76 | 214.40 |
| 1809 | 36.500 | 24.500 | 5.85 | 4.98 | 6.72  | 86.27 | 215.68 |
| 1810 | 36.750 | 24.500 | 5.52 | 4.81 | 6.23  | 93.05 | 232.63 |
| 1811 | 37.000 | 24.500 | 5.50 | 4.89 | 6.11  | 94.88 | 237.20 |
| 1812 | 37.250 | 24.500 | 6.11 | 6.24 | 5.98  | 96.94 | 242.35 |
| 1813 | 37.500 | 24.500 | 6.10 | 6.26 | 5.94  | 97.59 | 243.98 |
| 1814 | 37.750 | 24.500 | 5.65 | 5.25 | 6.05  | 95.82 | 239.55 |
| 1815 | 38.000 | 24.500 | 5.56 | 4.98 | 6.14  | 94.42 | 236.04 |
| 1816 | 38.250 | 24.500 | 5.51 | 5.07 | 5.95  | 97.43 | 243.57 |
| 1817 | 38.500 | 24.500 | 6.91 | 7.21 | 6.61  | 87.71 | 219.27 |
| 1818 | 38.750 | 24.500 | 6.72 | 5.35 | 8.09  | 71.67 | 179.17 |
| 1819 | 39.000 | 24.500 | 7.00 | 5.53 | 8.47  | 68.45 | 171.13 |
| 1820 | 39.250 | 24.500 | 6.69 | 4.92 | 8.46  | 68.53 | 171.33 |
| 1821 | 39.500 | 24.500 | 6.86 | 5.57 | 8.15  | 71.14 | 177.85 |
| 1822 | 39.750 | 24.500 | 5.83 | 5.01 | 6.65  | 87.18 | 217.95 |
| 1823 | 40.000 | 24.500 | 6.30 | 5.43 | 7.17  | 80.86 | 202.15 |
| 1824 | 40.250 | 24.500 | 6.99 | 5.90 | 8.08  | 71.76 | 179.39 |
| 1825 | 40.500 | 24.500 | 6.54 | 4.24 | 8.84  | 65.59 | 163.97 |
| 1826 | 40.750 | 24.500 | 8.16 | 4.57 | 11.75 | 49.35 | 123.37 |
| 1827 | 41.000 | 24.500 | 7.88 | 4.75 | 11.01 | 52.67 | 131.66 |
| 1828 | 41.250 | 24.500 | 6.84 | 6.69 | 6.99  | 82.94 | 207.35 |
| 1829 | 41.500 | 24.500 | 6.64 | 6.09 | 7.19  | 80.63 | 201.58 |
| 1830 | 41.750 | 24.500 | 6.88 | 4.19 | 9.57  | 60.59 | 151.47 |
| 1831 | 42.000 | 24.500 | 7.26 | 4.76 | 9.76  | 59.41 | 148.52 |
| 1832 | 42.250 | 24.500 | 6.32 | 5.09 | 7.55  | 76.79 | 191.98 |
| 1833 | 42.500 | 24.500 | 5.72 | 5.06 | 6.38  | 90.87 | 227.17 |
| 1834 | 42.750 | 24.500 | 6.75 | 4.57 | 8.93  | 64.93 | 162.32 |
| 1835 | 43.000 | 24.500 | 6.29 | 5.39 | 7.19  | 80.63 | 201.58 |
| 1836 | 43.250 | 24.500 | 6.17 | 5.81 | 6.53  | 88.78 | 221.95 |
| 1837 | 43.500 | 24.500 | 7.52 | 4.40 | 10.64 | 54.50 | 136.24 |
| 1838 | 43.750 | 24.500 | 7.27 | 5.52 | 9.02  | 64.28 | 160.70 |
| 1839 | 44.000 | 24.500 | 5.88 | 5.35 | 6.41  | 90.44 | 226.10 |
| 1840 | 44.250 | 24.500 | 7.20 | 5.15 | 9.25  | 62.68 | 156.71 |
| 1841 | 44.500 | 24.500 | 6.78 | 6.01 | 7.55  | 76.79 | 191.98 |
| 1842 | 44.750 | 24.500 | 6.69 | 5.89 | 7.49  | 77.41 | 193.51 |
| 1843 | 45.000 | 24.500 | 6.30 | 5.07 | 7.53  | 76.99 | 192.49 |
| 1844 | 45.250 | 24.500 | 7.36 | 5.80 | 8.92  | 65.00 | 162.50 |
| 1845 | 45.500 | 24.500 | 6.40 | 5.19 | 7.61  | 76.19 | 190.46 |
| 1846 | 45.750 | 24.500 | 7.18 | 4.82 | 9.54  | 60.78 | 151.94 |
| 1847 | 46.000 | 24.500 | 6.73 | 4.21 | 9.25  | 62.68 | 156.71 |

|      |        |        |      |      |       |       |        |
|------|--------|--------|------|------|-------|-------|--------|
| 1848 | 46.250 | 24.500 | 6.92 | 5.34 | 8.50  | 68.21 | 170.53 |
| 1849 | 46.500 | 24.500 | 6.59 | 5.39 | 7.79  | 74.43 | 186.06 |
| 1850 | 46.750 | 24.500 | 6.45 | 4.88 | 8.02  | 72.29 | 180.73 |
| 1851 | 47.000 | 24.500 | 6.30 | 5.65 | 6.95  | 83.42 | 208.54 |
| 1852 | 47.250 | 24.500 | 6.41 | 6.63 | 6.19  | 93.65 | 234.14 |
| 1853 | 47.500 | 24.500 | 6.69 | 5.45 | 7.93  | 73.11 | 182.78 |
| 1854 | 47.750 | 24.500 | 6.76 | 5.26 | 8.26  | 70.19 | 175.48 |
| 1855 | 48.000 | 24.500 | 6.83 | 4.99 | 8.67  | 66.87 | 167.19 |
| 1856 | 35.000 | 24.750 | 7.57 | 5.80 | 9.34  | 62.08 | 155.20 |
| 1857 | 35.250 | 24.750 | 6.04 | 4.83 | 7.25  | 79.97 | 199.92 |
| 1858 | 35.500 | 24.750 | 6.70 | 4.94 | 8.46  | 68.53 | 171.33 |
| 1859 | 35.750 | 24.750 | 8.48 | 4.52 | 12.44 | 46.61 | 116.53 |
| 1860 | 36.000 | 24.750 | 8.08 | 4.44 | 11.72 | 49.48 | 123.69 |
| 1861 | 36.250 | 24.750 | 7.20 | 5.29 | 9.11  | 63.65 | 159.11 |
| 1862 | 36.500 | 24.750 | 9.48 | 5.66 | 13.30 | 43.60 | 109.00 |
| 1863 | 36.750 | 24.750 | 6.57 | 5.29 | 7.85  | 73.86 | 184.64 |
| 1864 | 37.000 | 24.750 | 8.73 | 6.39 | 11.07 | 52.38 | 130.95 |
| 1865 | 37.250 | 24.750 | 7.04 | 5.54 | 8.54  | 67.89 | 169.73 |
| 1866 | 37.500 | 24.750 | 8.03 | 5.40 | 10.66 | 54.39 | 135.98 |
| 1867 | 37.750 | 24.750 | 8.81 | 5.06 | 12.56 | 46.17 | 115.42 |
| 1868 | 38.000 | 24.750 | 6.24 | 4.81 | 7.67  | 75.59 | 188.97 |
| 1869 | 38.250 | 24.750 | 7.88 | 5.39 | 10.37 | 55.91 | 139.79 |
| 1870 | 38.500 | 24.750 | 7.77 | 5.66 | 9.88  | 58.69 | 146.72 |
| 1871 | 38.750 | 24.750 | 9.25 | 6.19 | 12.31 | 47.10 | 117.76 |
| 1872 | 39.000 | 24.750 | 8.09 | 5.70 | 10.48 | 55.33 | 138.32 |
| 1873 | 39.250 | 24.750 | 8.31 | 5.80 | 10.82 | 53.59 | 133.97 |
| 1874 | 39.500 | 24.750 | 7.88 | 5.35 | 10.41 | 55.70 | 139.25 |
| 1875 | 39.750 | 24.750 | 6.07 | 5.15 | 6.99  | 82.94 | 207.35 |
| 1876 | 40.000 | 24.750 | 7.10 | 6.01 | 8.19  | 70.79 | 176.98 |
| 1877 | 40.250 | 24.750 | 5.95 | 5.89 | 6.01  | 96.46 | 241.14 |
| 1878 | 40.500 | 24.750 | 6.16 | 5.07 | 7.25  | 79.97 | 199.92 |
| 1879 | 40.750 | 24.750 | 6.91 | 5.80 | 8.02  | 72.29 | 180.73 |
| 1880 | 41.000 | 24.750 | 5.57 | 4.69 | 6.45  | 89.88 | 224.70 |
| 1881 | 41.250 | 24.750 | 6.36 | 5.40 | 7.32  | 79.20 | 198.01 |
| 1882 | 41.500 | 24.750 | 5.71 | 4.21 | 7.21  | 80.41 | 201.03 |
| 1883 | 41.750 | 24.750 | 6.19 | 5.34 | 7.04  | 82.35 | 205.88 |
| 1884 | 42.000 | 24.750 | 7.33 | 5.39 | 9.27  | 62.55 | 156.37 |
| 1885 | 42.250 | 24.750 | 9.43 | 4.88 | 13.98 | 41.48 | 103.70 |
| 1886 | 42.500 | 24.750 | 6.41 | 5.65 | 7.17  | 80.86 | 202.15 |
| 1887 | 42.750 | 24.750 | 6.36 | 6.63 | 6.09  | 95.19 | 237.98 |
| 1888 | 43.000 | 24.750 | 6.63 | 4.69 | 8.57  | 67.65 | 169.14 |
| 1889 | 43.250 | 24.750 | 7.46 | 4.33 | 10.59 | 54.75 | 136.88 |
| 1890 | 43.500 | 24.750 | 7.20 | 5.14 | 9.26  | 62.61 | 156.54 |
| 1891 | 43.750 | 24.750 | 8.92 | 3.61 | 14.23 | 40.75 | 101.88 |
| 1892 | 44.000 | 24.750 | 5.38 | 2.41 | 8.35  | 69.44 | 173.59 |
| 1893 | 44.250 | 24.750 | 8.44 | 3.23 | 13.65 | 42.48 | 106.20 |
| 1894 | 44.500 | 24.750 | 6.38 | 3.57 | 9.19  | 63.09 | 157.73 |
| 1895 | 44.750 | 24.750 | 7.42 | 3.73 | 11.11 | 52.19 | 130.48 |
| 1896 | 45.000 | 24.750 | 5.63 | 3.44 | 7.82  | 74.14 | 185.35 |
| 1897 | 45.250 | 24.750 | 5.43 | 3.26 | 7.60  | 76.29 | 190.71 |
| 1898 | 45.500 | 24.750 | 6.53 | 4.74 | 8.32  | 69.69 | 174.22 |
| 1899 | 45.750 | 24.750 | 7.46 | 5.23 | 9.69  | 59.84 | 149.59 |
| 1900 | 46.000 | 24.750 | 6.47 | 2.89 | 10.05 | 57.69 | 144.24 |

|      |        |        |      |      |       |       |        |
|------|--------|--------|------|------|-------|-------|--------|
| 1901 | 46.250 | 24.750 | 5.58 | 3.23 | 7.93  | 73.11 | 182.78 |
| 1902 | 46.500 | 24.750 | 6.24 | 5.91 | 6.57  | 88.24 | 220.60 |
| 1903 | 46.750 | 24.750 | 6.54 | 5.64 | 7.44  | 77.93 | 194.81 |
| 1904 | 47.000 | 24.750 | 6.45 | 5.48 | 7.42  | 78.14 | 195.34 |
| 1905 | 47.250 | 24.750 | 6.38 | 5.42 | 7.34  | 78.99 | 197.47 |
| 1906 | 47.500 | 24.750 | 6.07 | 3.53 | 8.61  | 67.34 | 168.35 |
| 1907 | 47.750 | 24.750 | 6.19 | 3.34 | 9.04  | 64.14 | 160.35 |
| 1908 | 48.000 | 24.750 | 7.99 | 3.47 | 12.51 | 46.35 | 115.88 |
| 1909 | 35.000 | 25.000 | 7.52 | 5.23 | 9.81  | 59.11 | 147.76 |
| 1910 | 35.250 | 25.000 | 8.19 | 3.94 | 12.44 | 46.61 | 116.53 |
| 1911 | 35.500 | 25.000 | 6.21 | 5.58 | 6.84  | 84.76 | 211.90 |
| 1912 | 35.750 | 25.000 | 6.11 | 5.87 | 6.35  | 91.30 | 228.24 |
| 1913 | 36.000 | 25.000 | 7.06 | 3.93 | 10.19 | 56.90 | 142.25 |
| 1914 | 36.250 | 25.000 | 7.05 | 4.64 | 9.46  | 61.29 | 153.23 |
| 1915 | 36.500 | 25.000 | 8.21 | 6.52 | 9.90  | 58.57 | 146.42 |
| 1916 | 36.750 | 25.000 | 7.50 | 4.43 | 10.57 | 54.86 | 137.14 |
| 1917 | 37.000 | 25.000 | 6.49 | 4.71 | 8.27  | 70.11 | 175.27 |
| 1918 | 37.250 | 25.000 | 6.70 | 4.44 | 8.96  | 64.71 | 161.78 |
| 1919 | 37.500 | 25.000 | 6.16 | 4.13 | 8.19  | 70.79 | 176.98 |
| 1920 | 37.750 | 25.000 | 9.20 | 5.07 | 13.33 | 43.50 | 108.75 |
| 1921 | 38.000 | 25.000 | 7.47 | 3.42 | 11.52 | 50.33 | 125.84 |
| 1922 | 38.250 | 25.000 | 8.50 | 3.53 | 13.47 | 43.05 | 107.62 |
| 1923 | 38.500 | 25.000 | 6.75 | 3.53 | 9.97  | 58.16 | 145.39 |
| 1924 | 38.750 | 25.000 | 5.36 | 3.37 | 7.35  | 78.88 | 197.20 |
| 1925 | 39.000 | 25.000 | 5.77 | 4.29 | 7.25  | 79.97 | 199.92 |
| 1926 | 39.250 | 25.000 | 5.62 | 3.48 | 7.76  | 74.71 | 186.78 |
| 1927 | 39.500 | 25.000 | 5.54 | 3.89 | 7.19  | 80.63 | 201.58 |
| 1928 | 39.750 | 25.000 | 6.19 | 3.61 | 8.77  | 66.11 | 165.28 |
| 1929 | 40.000 | 25.000 | 4.98 | 2.83 | 7.13  | 81.31 | 203.28 |
| 1930 | 40.250 | 25.000 | 6.01 | 3.46 | 8.56  | 67.73 | 169.33 |
| 1931 | 40.500 | 25.000 | 5.95 | 4.29 | 7.61  | 76.19 | 190.46 |
| 1932 | 40.750 | 25.000 | 5.36 | 3.95 | 6.77  | 85.63 | 214.09 |
| 1933 | 41.000 | 25.000 | 6.34 | 3.99 | 8.69  | 66.72 | 166.80 |
| 1934 | 41.250 | 25.000 | 6.53 | 4.23 | 8.83  | 65.66 | 164.16 |
| 1935 | 41.500 | 25.000 | 7.58 | 3.93 | 11.23 | 51.63 | 129.08 |
| 1936 | 41.750 | 25.000 | 5.86 | 3.68 | 8.04  | 72.11 | 180.28 |
| 1937 | 42.000 | 25.000 | 6.53 | 3.11 | 9.95  | 58.27 | 145.68 |
| 1938 | 42.250 | 25.000 | 7.31 | 4.29 | 10.33 | 56.13 | 140.33 |
| 1939 | 42.500 | 25.000 | 5.62 | 3.85 | 7.39  | 78.45 | 196.13 |
| 1940 | 42.750 | 25.000 | 6.18 | 5.04 | 7.32  | 79.20 | 198.01 |
| 1941 | 43.000 | 25.000 | 5.55 | 4.65 | 6.45  | 89.88 | 224.70 |
| 1942 | 43.250 | 25.000 | 7.21 | 4.40 | 10.02 | 57.87 | 144.67 |
| 1943 | 43.500 | 25.000 | 6.79 | 4.59 | 8.99  | 64.49 | 161.24 |
| 1944 | 43.750 | 25.000 | 6.70 | 3.83 | 9.57  | 60.59 | 151.47 |
| 1945 | 44.000 | 25.000 | 6.04 | 3.46 | 8.62  | 67.26 | 168.15 |
| 1946 | 44.250 | 25.000 | 6.00 | 3.27 | 8.73  | 66.41 | 166.04 |
| 1947 | 44.500 | 25.000 | 6.09 | 3.47 | 8.71  | 66.57 | 166.42 |
| 1948 | 44.750 | 25.000 | 6.16 | 3.66 | 8.66  | 66.95 | 167.38 |
| 1949 | 45.000 | 25.000 | 6.28 | 3.48 | 9.08  | 63.86 | 159.64 |
| 1950 | 45.250 | 25.000 | 5.56 | 3.30 | 7.82  | 74.14 | 185.35 |
| 1951 | 45.500 | 25.000 | 6.13 | 3.22 | 9.04  | 64.14 | 160.35 |
| 1952 | 45.750 | 25.000 | 6.75 | 2.57 | 10.93 | 53.05 | 132.63 |
| 1953 | 46.000 | 25.000 | 5.52 | 3.57 | 7.47  | 77.61 | 194.03 |

|      |        |        |      |      |       |        |        |
|------|--------|--------|------|------|-------|--------|--------|
| 1954 | 46.250 | 25.000 | 6.61 | 3.97 | 9.25  | 62.68  | 156.71 |
| 1955 | 46.500 | 25.000 | 6.99 | 4.32 | 9.66  | 60.02  | 150.06 |
| 1956 | 46.750 | 25.000 | 5.66 | 3.28 | 8.04  | 72.11  | 180.28 |
| 1957 | 47.000 | 25.000 | 5.84 | 3.41 | 8.27  | 70.11  | 175.27 |
| 1958 | 47.250 | 25.000 | 5.51 | 3.57 | 7.45  | 77.82  | 194.55 |
| 1959 | 47.500 | 25.000 | 6.09 | 2.97 | 9.21  | 62.95  | 157.39 |
| 1960 | 47.750 | 25.000 | 5.69 | 4.47 | 6.91  | 83.90  | 209.75 |
| 1961 | 48.000 | 25.000 | 5.54 | 3.53 | 7.55  | 76.79  | 191.98 |
| 1962 | 35.000 | 25.250 | 6.75 | 5.07 | 8.43  | 68.78  | 171.94 |
| 1963 | 35.250 | 25.250 | 5.65 | 3.19 | 8.11  | 71.49  | 178.73 |
| 1964 | 35.500 | 25.250 | 5.70 | 3.35 | 8.05  | 72.02  | 180.06 |
| 1965 | 35.750 | 25.250 | 6.53 | 3.55 | 9.51  | 60.97  | 152.42 |
| 1966 | 36.000 | 25.250 | 6.05 | 4.86 | 7.24  | 80.08  | 200.19 |
| 1967 | 36.250 | 25.250 | 7.39 | 3.28 | 11.50 | 50.42  | 126.05 |
| 1968 | 36.500 | 25.250 | 7.26 | 3.90 | 10.62 | 54.60  | 136.50 |
| 1969 | 36.750 | 25.250 | 6.29 | 4.67 | 7.91  | 73.30  | 183.24 |
| 1970 | 37.000 | 25.250 | 5.84 | 2.59 | 9.09  | 63.79  | 159.46 |
| 1971 | 37.250 | 25.250 | 6.35 | 3.20 | 9.50  | 61.03  | 152.58 |
| 1972 | 37.500 | 25.250 | 7.02 | 2.66 | 11.38 | 50.95  | 127.38 |
| 1973 | 37.750 | 25.250 | 6.01 | 5.72 | 6.30  | 92.02  | 230.05 |
| 1974 | 38.000 | 25.250 | 5.11 | 4.77 | 5.45  | 106.36 | 265.91 |
| 1975 | 38.250 | 25.250 | 5.48 | 5.08 | 5.88  | 98.59  | 246.47 |
| 1976 | 38.500 | 25.250 | 5.38 | 4.76 | 6.00  | 96.62  | 241.55 |
| 1977 | 38.750 | 25.250 | 5.46 | 4.19 | 6.73  | 86.14  | 215.36 |
| 1978 | 39.000 | 25.250 | 6.87 | 3.61 | 10.13 | 57.24  | 143.10 |
| 1979 | 39.250 | 25.250 | 6.08 | 5.39 | 6.77  | 85.63  | 214.09 |
| 1980 | 39.500 | 25.250 | 5.55 | 5.18 | 5.92  | 97.92  | 244.81 |
| 1981 | 39.750 | 25.250 | 5.34 | 4.17 | 6.51  | 89.05  | 222.63 |
| 1982 | 40.000 | 25.250 | 5.40 | 5.37 | 5.43  | 106.76 | 266.89 |
| 1983 | 40.250 | 25.250 | 6.20 | 5.62 | 6.78  | 85.51  | 213.77 |
| 1984 | 40.500 | 25.250 | 5.73 | 4.06 | 7.40  | 78.35  | 195.87 |
| 1985 | 40.750 | 25.250 | 5.79 | 3.64 | 7.94  | 73.02  | 182.55 |
| 1986 | 41.000 | 25.250 | 6.11 | 4.04 | 8.18  | 70.88  | 177.20 |
| 1987 | 41.250 | 25.250 | 6.85 | 4.89 | 8.81  | 65.81  | 164.53 |
| 1988 | 41.500 | 25.250 | 6.01 | 4.27 | 7.75  | 74.81  | 187.02 |
| 1989 | 41.750 | 25.250 | 6.57 | 3.69 | 9.45  | 61.36  | 153.39 |
| 1990 | 42.000 | 25.250 | 5.98 | 3.58 | 8.38  | 69.19  | 172.97 |
| 1991 | 42.250 | 25.250 | 6.11 | 3.66 | 8.56  | 67.73  | 169.33 |
| 1992 | 42.500 | 25.250 | 6.13 | 3.93 | 8.33  | 69.60  | 174.01 |
| 1993 | 42.750 | 25.250 | 6.28 | 3.73 | 8.83  | 65.66  | 164.16 |
| 1994 | 43.000 | 25.250 | 6.10 | 4.31 | 7.89  | 73.48  | 183.71 |
| 1995 | 43.250 | 25.250 | 6.00 | 3.19 | 8.81  | 65.81  | 164.53 |
| 1996 | 43.500 | 25.250 | 6.43 | 3.22 | 9.64  | 60.15  | 150.37 |
| 1997 | 43.750 | 25.250 | 6.48 | 4.30 | 8.66  | 66.95  | 167.38 |
| 1998 | 44.000 | 25.250 | 6.21 | 3.74 | 8.68  | 66.80  | 166.99 |
| 1999 | 44.250 | 25.250 | 5.86 | 4.02 | 7.70  | 75.30  | 188.24 |
| 2000 | 44.500 | 25.250 | 7.09 | 5.36 | 8.82  | 65.74  | 164.34 |
| 2001 | 44.750 | 25.250 | 6.69 | 4.87 | 8.51  | 68.13  | 170.33 |
| 2002 | 45.000 | 25.250 | 5.10 | 3.11 | 7.09  | 81.77  | 204.43 |
| 2003 | 45.250 | 25.250 | 5.72 | 3.69 | 7.75  | 74.81  | 187.02 |
| 2004 | 45.500 | 25.250 | 5.46 | 3.65 | 7.27  | 79.75  | 199.37 |
| 2005 | 45.750 | 25.250 | 6.22 | 4.07 | 8.37  | 69.27  | 173.18 |
| 2006 | 46.000 | 25.250 | 6.77 | 4.71 | 8.83  | 65.66  | 164.16 |

|      |        |        |       |      |       |       |        |
|------|--------|--------|-------|------|-------|-------|--------|
| 2007 | 46.250 | 25.250 | 8.82  | 6.32 | 11.32 | 51.22 | 128.06 |
| 2008 | 46.500 | 25.250 | 7.28  | 4.69 | 9.87  | 58.75 | 146.87 |
| 2009 | 46.750 | 25.250 | 7.81  | 5.19 | 10.43 | 55.59 | 138.98 |
| 2010 | 47.000 | 25.250 | 8.64  | 5.60 | 11.68 | 49.64 | 124.11 |
| 2011 | 47.250 | 25.250 | 8.37  | 5.82 | 10.92 | 53.10 | 132.75 |
| 2012 | 47.500 | 25.250 | 8.74  | 5.34 | 12.14 | 47.76 | 119.41 |
| 2013 | 47.750 | 25.250 | 8.07  | 6.12 | 10.02 | 57.87 | 144.67 |
| 2014 | 48.000 | 25.250 | 7.19  | 5.15 | 9.23  | 62.82 | 157.05 |
| 2015 | 35.000 | 25.500 | 10.17 | 4.80 | 15.54 | 37.32 | 93.29  |
| 2016 | 35.250 | 25.500 | 8.21  | 6.08 | 10.34 | 56.08 | 140.19 |
| 2017 | 35.500 | 25.500 | 10.24 | 6.29 | 14.19 | 40.87 | 102.16 |
| 2018 | 35.750 | 25.500 | 9.97  | 5.31 | 14.63 | 39.64 | 99.09  |
| 2019 | 36.000 | 25.500 | 9.86  | 6.79 | 12.93 | 44.85 | 112.12 |
| 2020 | 36.250 | 25.500 | 7.91  | 5.00 | 10.82 | 53.59 | 133.97 |
| 2021 | 36.500 | 25.500 | 8.84  | 7.13 | 10.55 | 54.96 | 137.40 |
| 2022 | 36.750 | 25.500 | 9.79  | 6.28 | 13.30 | 43.60 | 109.00 |
| 2023 | 37.000 | 25.500 | 9.47  | 6.21 | 12.73 | 45.55 | 113.88 |
| 2024 | 37.250 | 25.500 | 9.58  | 5.17 | 13.99 | 41.45 | 103.62 |
| 2025 | 37.500 | 25.500 | 7.83  | 4.99 | 10.67 | 54.34 | 135.86 |
| 2026 | 37.750 | 25.500 | 8.85  | 7.44 | 10.26 | 56.51 | 141.28 |
| 2027 | 38.000 | 25.500 | 8.33  | 5.59 | 11.07 | 52.38 | 130.95 |
| 2028 | 38.250 | 25.500 | 8.03  | 5.94 | 10.12 | 57.30 | 143.24 |
| 2029 | 38.500 | 25.500 | 10.98 | 5.39 | 16.57 | 35.00 | 87.49  |
| 2030 | 38.750 | 25.500 | 10.25 | 5.98 | 14.52 | 39.94 | 99.84  |
| 2031 | 39.000 | 25.500 | 10.66 | 5.08 | 16.24 | 35.71 | 89.27  |
| 2032 | 39.250 | 25.500 | 8.87  | 5.98 | 11.76 | 49.31 | 123.27 |
| 2033 | 39.500 | 25.500 | 8.08  | 4.49 | 11.67 | 49.69 | 124.22 |
| 2034 | 39.750 | 25.500 | 7.79  | 4.87 | 10.71 | 54.14 | 135.35 |
| 2035 | 40.000 | 25.500 | 8.56  | 5.04 | 12.08 | 48.00 | 120.00 |
| 2036 | 40.250 | 25.500 | 8.06  | 6.50 | 9.62  | 60.27 | 150.68 |
| 2037 | 40.500 | 25.500 | 8.87  | 6.05 | 11.69 | 49.60 | 124.01 |
| 2038 | 40.750 | 25.500 | 9.00  | 6.45 | 11.55 | 50.20 | 125.51 |
| 2039 | 41.000 | 25.500 | 7.41  | 6.36 | 8.46  | 68.53 | 171.33 |
| 2040 | 41.250 | 25.500 | 8.38  | 5.66 | 11.10 | 52.24 | 130.60 |
| 2041 | 41.500 | 25.500 | 7.02  | 5.81 | 8.23  | 70.45 | 176.12 |
| 2042 | 41.750 | 25.500 | 9.71  | 3.81 | 15.61 | 37.15 | 92.87  |
| 2043 | 42.000 | 25.500 | 6.54  | 5.86 | 7.22  | 80.30 | 200.75 |
| 2044 | 42.250 | 25.500 | 6.86  | 5.62 | 8.10  | 71.58 | 178.95 |
| 2045 | 42.500 | 25.500 | 7.13  | 5.76 | 8.50  | 68.21 | 170.53 |
| 2046 | 42.750 | 25.500 | 7.15  | 5.28 | 9.02  | 64.28 | 160.70 |
| 2047 | 43.000 | 25.500 | 5.93  | 4.73 | 7.13  | 81.31 | 203.28 |
| 2048 | 43.250 | 25.500 | 6.54  | 5.07 | 8.01  | 72.38 | 180.96 |
| 2049 | 43.500 | 25.500 | 6.86  | 6.01 | 7.71  | 75.20 | 187.99 |
| 2050 | 43.750 | 25.500 | 8.21  | 6.65 | 9.77  | 59.35 | 148.37 |
| 2051 | 44.000 | 25.500 | 7.46  | 4.01 | 10.91 | 53.15 | 132.87 |
| 2052 | 44.250 | 25.500 | 6.99  | 4.29 | 9.69  | 59.84 | 149.59 |
| 2053 | 44.500 | 25.500 | 6.42  | 4.45 | 8.39  | 69.11 | 172.76 |
| 2054 | 44.750 | 25.500 | 6.57  | 5.42 | 7.72  | 75.10 | 187.75 |
| 2055 | 45.000 | 25.500 | 6.94  | 4.94 | 8.94  | 64.86 | 162.14 |
| 2056 | 45.250 | 25.500 | 6.27  | 5.72 | 6.82  | 85.01 | 212.52 |
| 2057 | 45.500 | 25.500 | 5.39  | 4.75 | 6.03  | 96.14 | 240.34 |
| 2058 | 45.750 | 25.500 | 6.39  | 6.70 | 6.08  | 95.35 | 238.37 |
| 2059 | 46.000 | 25.500 | 6.84  | 7.04 | 6.64  | 87.31 | 218.27 |

|      |        |        |      |      |       |        |        |
|------|--------|--------|------|------|-------|--------|--------|
| 2060 | 46.250 | 25.500 | 6.50 | 6.21 | 6.79  | 85.38  | 213.46 |
| 2061 | 46.500 | 25.500 | 6.17 | 5.20 | 7.14  | 81.20  | 203.00 |
| 2062 | 46.750 | 25.500 | 6.04 | 3.91 | 8.17  | 70.97  | 177.41 |
| 2063 | 47.000 | 25.500 | 6.70 | 5.66 | 7.74  | 74.91  | 187.27 |
| 2064 | 47.250 | 25.500 | 8.48 | 5.35 | 11.61 | 49.94  | 124.86 |
| 2065 | 47.500 | 25.500 | 8.08 | 5.06 | 11.10 | 52.24  | 130.60 |
| 2066 | 47.750 | 25.500 | 7.20 | 5.13 | 9.27  | 62.55  | 156.37 |
| 2067 | 48.000 | 25.500 | 9.48 | 6.55 | 12.41 | 46.73  | 116.81 |
| 2068 | 35.000 | 25.750 | 8.44 | 5.89 | 10.99 | 52.76  | 131.90 |
| 2069 | 35.250 | 25.750 | 8.17 | 4.91 | 11.43 | 50.73  | 126.83 |
| 2070 | 35.500 | 25.750 | 8.06 | 6.39 | 9.73  | 59.59  | 148.98 |
| 2071 | 35.750 | 25.750 | 6.11 | 4.60 | 7.62  | 76.09  | 190.21 |
| 2072 | 36.000 | 25.750 | 7.04 | 6.73 | 7.35  | 78.88  | 197.20 |
| 2073 | 36.250 | 25.750 | 7.99 | 5.88 | 10.10 | 57.41  | 143.52 |
| 2074 | 36.500 | 25.750 | 7.67 | 5.81 | 9.53  | 60.84  | 152.10 |
| 2075 | 36.750 | 25.750 | 7.78 | 4.77 | 10.79 | 53.74  | 134.35 |
| 2076 | 37.000 | 25.750 | 6.03 | 4.59 | 7.47  | 77.61  | 194.03 |
| 2077 | 37.250 | 25.750 | 7.05 | 7.04 | 7.06  | 82.12  | 205.30 |
| 2078 | 37.500 | 25.750 | 6.53 | 5.19 | 7.87  | 73.67  | 184.17 |
| 2079 | 37.750 | 25.750 | 6.68 | 5.26 | 8.10  | 71.58  | 178.95 |
| 2080 | 38.000 | 25.750 | 5.35 | 4.96 | 5.74  | 100.99 | 252.48 |
| 2081 | 38.250 | 25.750 | 6.97 | 6.01 | 7.93  | 73.11  | 182.78 |
| 2082 | 38.500 | 25.750 | 5.62 | 5.24 | 6.00  | 96.62  | 241.55 |
| 2083 | 38.750 | 25.750 | 6.06 | 5.30 | 6.82  | 85.01  | 212.52 |
| 2084 | 39.000 | 25.750 | 6.28 | 4.09 | 8.47  | 68.45  | 171.13 |
| 2085 | 39.250 | 25.750 | 5.99 | 4.47 | 7.51  | 77.20  | 193.00 |
| 2086 | 39.500 | 25.750 | 6.76 | 4.64 | 8.88  | 65.29  | 163.23 |
| 2087 | 39.750 | 25.750 | 6.26 | 6.10 | 6.42  | 90.30  | 225.75 |
| 2088 | 40.000 | 25.750 | 6.38 | 6.27 | 6.49  | 89.33  | 223.32 |
| 2089 | 40.250 | 25.750 | 5.86 | 4.95 | 6.77  | 85.66  | 214.15 |
| 2090 | 40.500 | 25.750 | 6.43 | 6.35 | 6.51  | 89.05  | 222.63 |
| 2091 | 40.750 | 25.750 | 6.40 | 5.91 | 6.89  | 84.14  | 210.36 |
| 2092 | 41.000 | 25.750 | 6.11 | 5.25 | 6.97  | 83.18  | 207.94 |
| 2093 | 41.250 | 25.750 | 6.43 | 5.77 | 7.09  | 81.78  | 204.46 |
| 2094 | 41.500 | 25.750 | 6.05 | 5.39 | 6.71  | 86.40  | 216.00 |
| 2095 | 41.750 | 25.750 | 6.77 | 5.70 | 7.84  | 73.95  | 184.88 |
| 2096 | 42.000 | 25.750 | 7.07 | 5.65 | 8.49  | 68.29  | 170.73 |
| 2097 | 42.250 | 25.750 | 7.20 | 6.05 | 8.35  | 69.44  | 173.59 |
| 2098 | 42.500 | 25.750 | 6.50 | 4.36 | 8.64  | 67.11  | 167.77 |
| 2099 | 42.750 | 25.750 | 5.77 | 5.35 | 6.19  | 93.65  | 234.14 |
| 2100 | 43.000 | 25.750 | 6.66 | 5.14 | 8.18  | 70.88  | 177.20 |
| 2101 | 43.250 | 25.750 | 6.36 | 6.06 | 6.66  | 87.05  | 217.62 |
| 2102 | 43.500 | 25.750 | 6.82 | 6.02 | 7.62  | 76.09  | 190.21 |
| 2103 | 43.750 | 25.750 | 6.13 | 5.65 | 6.61  | 87.71  | 219.27 |
| 2104 | 44.000 | 25.750 | 6.82 | 5.67 | 7.97  | 72.75  | 181.86 |
| 2105 | 44.250 | 25.750 | 6.37 | 6.27 | 6.47  | 89.60  | 224.01 |
| 2106 | 44.500 | 25.750 | 5.93 | 5.48 | 6.38  | 90.87  | 227.17 |
| 2107 | 44.750 | 25.750 | 5.86 | 5.46 | 6.26  | 92.61  | 231.52 |
| 2108 | 45.000 | 25.750 | 5.57 | 4.89 | 6.25  | 92.76  | 231.89 |
| 2109 | 45.250 | 25.750 | 5.71 | 5.18 | 6.24  | 92.90  | 232.26 |
| 2110 | 45.500 | 25.750 | 5.41 | 5.38 | 5.44  | 106.56 | 266.40 |
| 2111 | 45.750 | 25.750 | 5.87 | 5.68 | 6.06  | 95.66  | 239.16 |
| 2112 | 46.000 | 25.750 | 6.37 | 5.68 | 7.06  | 82.12  | 205.30 |



|      |        |        |      |      |       |       |        |
|------|--------|--------|------|------|-------|-------|--------|
| 2113 | 46.250 | 25.750 | 6.17 | 5.18 | 7.16  | 80.97 | 202.43 |
| 2114 | 46.500 | 25.750 | 6.28 | 5.84 | 6.72  | 86.27 | 215.68 |
| 2115 | 46.750 | 25.750 | 6.03 | 5.50 | 6.56  | 88.37 | 220.94 |
| 2116 | 47.000 | 25.750 | 6.57 | 5.39 | 7.75  | 74.81 | 187.02 |
| 2117 | 47.250 | 25.750 | 6.46 | 4.25 | 8.67  | 66.87 | 167.19 |
| 2118 | 47.500 | 25.750 | 6.88 | 5.18 | 8.58  | 67.58 | 168.94 |
| 2119 | 47.750 | 25.750 | 6.99 | 5.19 | 8.79  | 65.96 | 164.90 |
| 2120 | 48.000 | 25.750 | 6.49 | 4.70 | 8.28  | 70.02 | 175.06 |
| 2121 | 35.000 | 26.000 | 5.83 | 5.01 | 6.65  | 87.18 | 217.95 |
| 2122 | 35.250 | 26.000 | 6.30 | 5.43 | 7.17  | 80.86 | 202.15 |
| 2123 | 35.500 | 26.000 | 6.99 | 5.90 | 8.08  | 71.76 | 179.39 |
| 2124 | 35.750 | 26.000 | 6.54 | 4.24 | 8.84  | 65.59 | 163.97 |
| 2125 | 36.000 | 26.000 | 8.16 | 4.57 | 11.75 | 49.35 | 123.37 |
| 2126 | 36.250 | 26.000 | 7.88 | 4.75 | 11.01 | 52.67 | 131.66 |
| 2127 | 36.500 | 26.000 | 6.84 | 6.69 | 6.99  | 82.94 | 207.35 |
| 2128 | 36.750 | 26.000 | 6.64 | 6.09 | 7.19  | 80.63 | 201.58 |
| 2129 | 37.000 | 26.000 | 6.88 | 4.19 | 9.57  | 60.59 | 151.47 |
| 2130 | 37.250 | 26.000 | 7.26 | 4.76 | 9.76  | 59.41 | 148.52 |
| 2131 | 37.500 | 26.000 | 6.32 | 5.09 | 7.55  | 76.79 | 191.98 |
| 2132 | 37.750 | 26.000 | 5.72 | 5.06 | 6.38  | 90.87 | 227.17 |
| 2133 | 38.000 | 26.000 | 6.75 | 4.57 | 8.93  | 64.93 | 162.32 |
| 2134 | 38.250 | 26.000 | 6.29 | 5.39 | 7.19  | 80.63 | 201.58 |
| 2135 | 38.500 | 26.000 | 6.17 | 5.81 | 6.53  | 88.78 | 221.95 |
| 2136 | 38.750 | 26.000 | 7.52 | 4.40 | 10.64 | 54.50 | 136.24 |
| 2137 | 39.000 | 26.000 | 6.57 | 4.41 | 8.73  | 66.41 | 166.04 |
| 2138 | 39.250 | 26.000 | 5.96 | 4.02 | 7.90  | 73.39 | 183.47 |
| 2139 | 39.500 | 26.000 | 5.84 | 4.96 | 6.72  | 86.27 | 215.68 |
| 2140 | 39.750 | 26.000 | 6.07 | 5.33 | 6.81  | 85.13 | 212.83 |
| 2141 | 40.000 | 26.000 | 6.28 | 5.66 | 6.90  | 84.02 | 210.05 |
| 2142 | 40.250 | 26.000 | 6.30 | 5.99 | 6.61  | 87.71 | 219.27 |
| 2143 | 40.500 | 26.000 | 6.69 | 4.76 | 8.62  | 67.26 | 168.15 |
| 2144 | 40.750 | 26.000 | 6.15 | 5.53 | 6.77  | 85.63 | 214.09 |
| 2145 | 41.000 | 26.000 | 5.89 | 4.97 | 6.81  | 85.13 | 212.83 |
| 2146 | 41.250 | 26.000 | 6.72 | 5.90 | 7.54  | 76.89 | 192.23 |
| 2147 | 41.500 | 26.000 | 6.30 | 5.72 | 6.88  | 84.27 | 210.66 |
| 2148 | 41.750 | 26.000 | 6.67 | 6.19 | 7.15  | 81.08 | 202.71 |
| 2149 | 42.000 | 26.000 | 7.06 | 5.98 | 8.14  | 71.23 | 178.07 |
| 2150 | 42.250 | 26.000 | 7.27 | 5.52 | 9.02  | 64.28 | 160.70 |
| 2151 | 42.500 | 26.000 | 5.88 | 5.35 | 6.41  | 90.44 | 226.10 |
| 2152 | 42.750 | 26.000 | 7.20 | 5.15 | 9.25  | 62.68 | 156.71 |
| 2153 | 43.000 | 26.000 | 6.78 | 6.01 | 7.55  | 76.79 | 191.98 |
| 2154 | 43.250 | 26.000 | 6.73 | 4.21 | 9.25  | 62.68 | 156.71 |
| 2155 | 43.500 | 26.000 | 6.92 | 5.34 | 8.50  | 68.21 | 170.53 |
| 2156 | 43.750 | 26.000 | 6.59 | 5.39 | 7.79  | 74.43 | 186.06 |
| 2157 | 44.000 | 26.000 | 6.45 | 4.88 | 8.02  | 72.29 | 180.73 |
| 2158 | 44.250 | 26.000 | 6.30 | 5.65 | 6.95  | 83.42 | 208.54 |
| 2159 | 44.500 | 26.000 | 6.41 | 6.63 | 6.19  | 93.65 | 234.14 |
| 2160 | 44.750 | 26.000 | 6.69 | 5.45 | 7.93  | 73.11 | 182.78 |
| 2161 | 45.000 | 26.000 | 6.76 | 5.26 | 8.26  | 70.19 | 175.48 |
| 2162 | 45.250 | 26.000 | 6.83 | 4.99 | 8.67  | 66.87 | 167.19 |
| 2163 | 45.500 | 26.000 | 6.81 | 4.84 | 8.78  | 66.04 | 165.09 |
| 2164 | 45.750 | 26.000 | 7.63 | 5.31 | 9.95  | 58.27 | 145.68 |
| 2165 | 46.000 | 26.000 | 7.29 | 4.83 | 9.75  | 59.47 | 148.67 |

|      |        |        |      |      |       |       |        |
|------|--------|--------|------|------|-------|-------|--------|
| 2166 | 46.250 | 26.000 | 6.26 | 4.94 | 7.58  | 76.49 | 191.22 |
| 2167 | 46.500 | 26.000 | 6.14 | 4.52 | 7.76  | 74.71 | 186.78 |
| 2168 | 46.750 | 26.000 | 6.62 | 4.44 | 8.80  | 65.89 | 164.72 |
| 2169 | 47.000 | 26.000 | 7.07 | 5.29 | 8.85  | 65.51 | 163.79 |
| 2170 | 47.250 | 26.000 | 7.22 | 5.66 | 8.78  | 66.04 | 165.09 |
| 2171 | 47.500 | 26.000 | 9.12 | 5.29 | 12.95 | 44.78 | 111.94 |
| 2172 | 47.750 | 26.000 | 7.56 | 6.39 | 8.73  | 66.41 | 166.04 |
| 2173 | 48.000 | 26.000 | 8.66 | 5.54 | 11.78 | 49.22 | 123.06 |
| 2174 | 35.000 | 26.250 | 7.84 | 4.99 | 10.69 | 54.24 | 135.60 |
| 2175 | 35.250 | 26.250 | 7.50 | 4.84 | 10.16 | 57.07 | 142.67 |
| 2176 | 35.500 | 26.250 | 6.17 | 5.31 | 7.03  | 82.47 | 206.17 |
| 2177 | 35.750 | 26.250 | 6.04 | 4.83 | 7.25  | 79.97 | 199.92 |
| 2178 | 36.000 | 26.250 | 6.70 | 4.94 | 8.46  | 68.53 | 171.33 |
| 2179 | 36.250 | 26.250 | 8.48 | 4.52 | 12.44 | 46.61 | 116.53 |
| 2180 | 36.500 | 26.250 | 8.08 | 4.44 | 11.72 | 49.48 | 123.69 |
| 2181 | 36.750 | 26.250 | 8.73 | 6.39 | 11.07 | 52.38 | 130.95 |
| 2182 | 37.000 | 26.250 | 7.04 | 5.54 | 8.54  | 67.89 | 169.73 |
| 2183 | 37.250 | 26.250 | 8.03 | 5.40 | 10.66 | 54.39 | 135.98 |
| 2184 | 37.500 | 26.250 | 8.81 | 5.06 | 12.56 | 46.17 | 115.42 |
| 2185 | 37.750 | 26.250 | 6.24 | 4.81 | 7.67  | 75.59 | 188.97 |
| 2186 | 38.000 | 26.250 | 7.88 | 5.39 | 10.37 | 55.91 | 139.79 |
| 2187 | 38.250 | 26.250 | 7.77 | 5.66 | 9.88  | 58.69 | 146.72 |
| 2188 | 38.500 | 26.250 | 9.25 | 6.19 | 12.31 | 47.10 | 117.76 |
| 2189 | 38.750 | 26.250 | 8.09 | 5.70 | 10.48 | 55.33 | 138.32 |
| 2190 | 39.000 | 26.250 | 8.31 | 5.80 | 10.82 | 53.59 | 133.97 |
| 2191 | 39.250 | 26.250 | 7.88 | 5.35 | 10.41 | 55.70 | 139.25 |
| 2192 | 39.500 | 26.250 | 6.07 | 5.15 | 6.99  | 82.94 | 207.35 |
| 2193 | 39.750 | 26.250 | 7.10 | 6.01 | 8.19  | 70.79 | 176.98 |
| 2194 | 40.000 | 26.250 | 5.95 | 5.89 | 6.01  | 96.46 | 241.14 |
| 2195 | 40.250 | 26.250 | 6.16 | 5.07 | 7.25  | 79.97 | 199.92 |
| 2196 | 40.500 | 26.250 | 6.91 | 5.80 | 8.02  | 72.29 | 180.73 |
| 2197 | 40.750 | 26.250 | 5.57 | 4.69 | 6.45  | 89.88 | 224.70 |
| 2198 | 41.000 | 26.250 | 6.36 | 5.40 | 7.32  | 79.20 | 198.01 |
| 2199 | 41.250 | 26.250 | 5.71 | 4.21 | 7.21  | 80.41 | 201.03 |
| 2200 | 41.500 | 26.250 | 6.19 | 5.34 | 7.04  | 82.35 | 205.88 |
| 2201 | 41.750 | 26.250 | 7.33 | 5.39 | 9.27  | 62.55 | 156.37 |
| 2202 | 42.000 | 26.250 | 9.43 | 4.88 | 13.98 | 41.48 | 103.70 |
| 2203 | 42.250 | 26.250 | 6.41 | 5.65 | 7.17  | 80.86 | 202.15 |
| 2204 | 42.500 | 26.250 | 6.36 | 6.63 | 6.09  | 95.19 | 237.98 |
| 2205 | 42.750 | 26.250 | 6.63 | 4.69 | 8.57  | 67.65 | 169.14 |
| 2206 | 43.000 | 26.250 | 7.46 | 4.33 | 10.59 | 54.75 | 136.88 |
| 2207 | 43.250 | 26.250 | 7.20 | 5.14 | 9.26  | 62.61 | 156.54 |
| 2208 | 43.500 | 26.250 | 8.92 | 3.61 | 14.23 | 40.75 | 101.88 |
| 2209 | 43.750 | 26.250 | 5.38 | 2.41 | 8.35  | 69.44 | 173.59 |
| 2210 | 44.000 | 26.250 | 8.44 | 3.23 | 13.65 | 42.48 | 106.20 |
| 2211 | 44.250 | 26.250 | 6.38 | 3.57 | 9.19  | 63.09 | 157.73 |
| 2212 | 44.500 | 26.250 | 7.42 | 3.73 | 11.11 | 52.19 | 130.48 |
| 2213 | 44.750 | 26.250 | 5.63 | 3.44 | 7.82  | 74.14 | 185.35 |
| 2214 | 45.000 | 26.250 | 5.43 | 3.26 | 7.60  | 76.29 | 190.71 |
| 2215 | 45.250 | 26.250 | 6.53 | 4.74 | 8.32  | 69.69 | 174.22 |
| 2216 | 45.500 | 26.250 | 7.46 | 5.23 | 9.69  | 59.84 | 149.59 |
| 2217 | 45.750 | 26.250 | 6.66 | 3.12 | 10.20 | 56.85 | 142.12 |
| 2218 | 46.000 | 26.250 | 6.52 | 2.80 | 10.24 | 56.62 | 141.56 |

|      |        |        |      |      |       |       |        |
|------|--------|--------|------|------|-------|-------|--------|
| 2219 | 46.250 | 26.250 | 5.47 | 2.99 | 7.95  | 72.93 | 182.32 |
| 2220 | 46.500 | 26.250 | 6.10 | 3.48 | 8.72  | 66.49 | 166.23 |
| 2221 | 46.750 | 26.250 | 6.89 | 3.49 | 10.29 | 56.35 | 140.87 |
| 2222 | 47.000 | 26.250 | 5.36 | 3.46 | 7.26  | 79.86 | 199.64 |
| 2223 | 47.250 | 26.250 | 6.11 | 4.10 | 8.12  | 71.40 | 178.51 |
| 2224 | 47.500 | 26.250 | 7.00 | 4.87 | 9.13  | 63.51 | 158.76 |
| 2225 | 47.750 | 26.250 | 6.14 | 4.38 | 7.90  | 73.39 | 183.47 |
| 2226 | 48.000 | 26.250 | 5.71 | 3.82 | 7.60  | 76.29 | 190.71 |
| 2227 | 35.000 | 26.500 | 6.64 | 5.02 | 8.26  | 70.19 | 175.48 |
| 2228 | 35.250 | 26.500 | 5.40 | 3.44 | 7.36  | 78.77 | 196.93 |
| 2229 | 35.500 | 26.500 | 5.51 | 3.32 | 7.70  | 75.30 | 188.24 |
| 2230 | 35.750 | 26.500 | 7.80 | 3.24 | 12.36 | 46.91 | 117.29 |
| 2231 | 36.000 | 26.500 | 5.71 | 3.02 | 8.40  | 69.02 | 172.56 |
| 2232 | 36.250 | 26.500 | 5.74 | 2.85 | 8.63  | 67.18 | 167.96 |
| 2233 | 36.500 | 26.500 | 5.51 | 3.41 | 7.61  | 76.19 | 190.46 |
| 2234 | 36.750 | 26.500 | 5.52 | 3.22 | 7.82  | 74.14 | 185.35 |
| 2235 | 37.000 | 26.500 | 7.52 | 5.23 | 9.81  | 59.11 | 147.76 |
| 2236 | 37.250 | 26.500 | 8.19 | 3.94 | 12.44 | 46.61 | 116.53 |
| 2237 | 37.500 | 26.500 | 6.21 | 5.58 | 6.84  | 84.76 | 211.90 |
| 2238 | 37.750 | 26.500 | 6.11 | 5.87 | 6.35  | 91.30 | 228.24 |
| 2239 | 38.000 | 26.500 | 7.06 | 3.93 | 10.19 | 56.90 | 142.25 |
| 2240 | 38.250 | 26.500 | 7.05 | 4.64 | 9.46  | 61.29 | 153.23 |
| 2241 | 38.500 | 26.500 | 8.21 | 6.52 | 9.90  | 58.57 | 146.42 |
| 2242 | 38.750 | 26.500 | 7.50 | 4.43 | 10.57 | 54.86 | 137.14 |
| 2243 | 39.000 | 26.500 | 6.49 | 4.71 | 8.27  | 70.11 | 175.27 |
| 2244 | 39.250 | 26.500 | 6.70 | 4.44 | 8.96  | 64.71 | 161.78 |
| 2245 | 39.500 | 26.500 | 6.16 | 4.13 | 8.19  | 70.79 | 176.98 |
| 2246 | 39.750 | 26.500 | 7.84 | 3.87 | 11.81 | 49.10 | 122.75 |
| 2247 | 40.000 | 26.500 | 7.74 | 5.83 | 9.65  | 60.08 | 150.21 |
| 2248 | 40.250 | 26.500 | 7.50 | 3.86 | 11.14 | 52.05 | 130.13 |
| 2249 | 40.500 | 26.500 | 5.57 | 4.00 | 7.14  | 81.20 | 203.00 |
| 2250 | 40.750 | 26.500 | 6.63 | 3.75 | 9.51  | 60.97 | 152.42 |
| 2251 | 41.000 | 26.500 | 7.93 | 4.45 | 11.41 | 50.82 | 127.05 |
| 2252 | 41.250 | 26.500 | 7.35 | 3.83 | 10.87 | 53.34 | 133.36 |
| 2253 | 41.500 | 26.500 | 7.12 | 3.69 | 10.55 | 54.96 | 137.40 |
| 2254 | 41.750 | 26.500 | 5.48 | 3.41 | 7.55  | 76.79 | 191.98 |
| 2255 | 42.000 | 26.500 | 6.48 | 2.94 | 10.02 | 57.87 | 144.67 |
| 2256 | 42.250 | 26.500 | 5.96 | 3.60 | 8.32  | 69.69 | 174.22 |
| 2257 | 42.500 | 26.500 | 5.54 | 3.50 | 7.58  | 76.49 | 191.22 |
| 2258 | 42.750 | 26.500 | 9.20 | 5.07 | 13.33 | 43.50 | 108.75 |
| 2259 | 43.000 | 26.500 | 7.47 | 3.42 | 11.52 | 50.33 | 125.84 |
| 2260 | 43.250 | 26.500 | 8.50 | 3.53 | 13.47 | 43.05 | 107.62 |
| 2261 | 43.500 | 26.500 | 6.75 | 3.53 | 9.97  | 58.16 | 145.39 |
| 2262 | 43.750 | 26.500 | 5.36 | 3.37 | 7.35  | 78.88 | 197.20 |
| 2263 | 44.000 | 26.500 | 6.19 | 3.61 | 8.77  | 66.11 | 165.28 |
| 2264 | 44.250 | 26.500 | 4.98 | 2.83 | 7.13  | 81.31 | 203.28 |
| 2265 | 44.500 | 26.500 | 6.01 | 3.46 | 8.56  | 67.73 | 169.33 |
| 2266 | 44.750 | 26.500 | 5.95 | 4.29 | 7.61  | 76.19 | 190.46 |
| 2267 | 45.000 | 26.500 | 5.36 | 3.95 | 6.77  | 85.63 | 214.09 |
| 2268 | 45.250 | 26.500 | 6.34 | 3.99 | 8.69  | 66.72 | 166.80 |
| 2269 | 45.500 | 26.500 | 6.53 | 4.23 | 8.83  | 65.66 | 164.16 |
| 2270 | 45.750 | 26.500 | 7.58 | 3.93 | 11.23 | 51.63 | 129.08 |
| 2271 | 46.000 | 26.500 | 5.86 | 3.68 | 8.04  | 72.11 | 180.28 |

|      |        |        |      |      |       |        |        |
|------|--------|--------|------|------|-------|--------|--------|
| 2272 | 46.250 | 26.500 | 6.53 | 3.11 | 9.95  | 58.27  | 145.68 |
| 2273 | 46.500 | 26.500 | 7.31 | 4.29 | 10.33 | 56.13  | 140.33 |
| 2274 | 46.750 | 26.500 | 5.62 | 3.85 | 7.39  | 78.45  | 196.13 |
| 2275 | 47.000 | 26.500 | 6.18 | 5.04 | 7.32  | 79.20  | 198.01 |
| 2276 | 47.250 | 26.500 | 5.55 | 4.65 | 6.45  | 89.88  | 224.70 |
| 2277 | 47.500 | 26.500 | 7.21 | 4.40 | 10.02 | 57.87  | 144.67 |
| 2278 | 47.750 | 26.500 | 6.79 | 4.59 | 8.99  | 64.49  | 161.24 |
| 2279 | 48.000 | 26.500 | 6.70 | 3.83 | 9.57  | 60.59  | 151.47 |
| 2280 | 35.000 | 26.750 | 6.67 | 4.33 | 9.01  | 64.35  | 160.88 |
| 2281 | 35.250 | 26.750 | 6.19 | 4.21 | 8.17  | 70.97  | 177.41 |
| 2282 | 35.500 | 26.750 | 5.52 | 2.95 | 8.09  | 71.67  | 179.17 |
| 2283 | 35.750 | 26.750 | 5.79 | 3.46 | 8.12  | 71.40  | 178.51 |
| 2284 | 36.000 | 26.750 | 8.06 | 3.77 | 12.35 | 46.95  | 117.38 |
| 2285 | 36.250 | 26.750 | 6.32 | 2.56 | 10.08 | 57.52  | 143.81 |
| 2286 | 36.500 | 26.750 | 5.63 | 3.31 | 7.95  | 72.93  | 182.32 |
| 2287 | 36.750 | 26.750 | 6.11 | 3.09 | 9.13  | 63.51  | 158.76 |
| 2288 | 37.000 | 26.750 | 7.08 | 3.63 | 10.53 | 55.07  | 137.66 |
| 2289 | 37.250 | 26.750 | 6.27 | 3.44 | 9.10  | 63.72  | 159.29 |
| 2290 | 37.500 | 26.750 | 6.51 | 3.69 | 9.33  | 62.15  | 155.36 |
| 2291 | 37.750 | 26.750 | 6.48 | 3.11 | 9.85  | 58.87  | 147.16 |
| 2292 | 38.000 | 26.750 | 6.36 | 2.92 | 9.80  | 59.17  | 147.91 |
| 2293 | 38.250 | 26.750 | 6.30 | 5.95 | 6.65  | 87.18  | 217.95 |
| 2294 | 38.500 | 26.750 | 5.57 | 3.90 | 7.24  | 80.08  | 200.19 |
| 2295 | 38.750 | 26.750 | 5.87 | 4.19 | 7.55  | 76.79  | 191.98 |
| 2296 | 39.000 | 26.750 | 5.66 | 3.99 | 7.33  | 79.09  | 197.74 |
| 2297 | 39.250 | 26.750 | 6.06 | 4.37 | 7.75  | 74.81  | 187.02 |
| 2298 | 39.500 | 26.750 | 5.96 | 5.42 | 6.50  | 89.19  | 222.97 |
| 2299 | 39.750 | 26.750 | 5.47 | 4.89 | 6.05  | 95.82  | 239.55 |
| 2300 | 40.000 | 26.750 | 5.84 | 4.60 | 7.08  | 81.89  | 204.72 |
| 2301 | 40.250 | 26.750 | 6.75 | 2.93 | 10.57 | 54.86  | 137.14 |
| 2302 | 40.500 | 26.750 | 5.78 | 3.08 | 8.48  | 68.37  | 170.93 |
| 2303 | 40.750 | 26.750 | 6.09 | 2.91 | 9.27  | 62.55  | 156.37 |
| 2304 | 41.000 | 26.750 | 5.98 | 5.24 | 6.72  | 86.27  | 215.68 |
| 2305 | 41.250 | 26.750 | 6.75 | 5.07 | 8.43  | 68.78  | 171.94 |
| 2306 | 41.500 | 26.750 | 5.65 | 3.19 | 8.11  | 71.49  | 178.73 |
| 2307 | 41.750 | 26.750 | 5.70 | 3.35 | 8.05  | 72.02  | 180.06 |
| 2308 | 42.000 | 26.750 | 6.53 | 3.55 | 9.51  | 60.97  | 152.42 |
| 2309 | 42.250 | 26.750 | 6.05 | 4.86 | 7.24  | 80.08  | 200.19 |
| 2310 | 42.500 | 26.750 | 7.39 | 3.28 | 11.50 | 50.42  | 126.05 |
| 2311 | 42.750 | 26.750 | 7.26 | 3.90 | 10.62 | 54.60  | 136.50 |
| 2312 | 43.000 | 26.750 | 6.29 | 4.67 | 7.91  | 73.30  | 183.24 |
| 2313 | 43.250 | 26.750 | 5.84 | 2.59 | 9.09  | 63.79  | 159.46 |
| 2314 | 43.500 | 26.750 | 6.35 | 3.20 | 9.50  | 61.03  | 152.58 |
| 2315 | 43.750 | 26.750 | 7.02 | 2.66 | 11.38 | 50.95  | 127.38 |
| 2316 | 44.000 | 26.750 | 6.01 | 5.72 | 6.30  | 92.02  | 230.05 |
| 2317 | 44.250 | 26.750 | 5.11 | 4.77 | 5.45  | 106.36 | 265.91 |
| 2318 | 44.500 | 26.750 | 5.48 | 5.08 | 5.88  | 98.59  | 246.47 |
| 2319 | 44.750 | 26.750 | 5.38 | 4.76 | 6.00  | 96.62  | 241.55 |
| 2320 | 45.000 | 26.750 | 5.46 | 4.19 | 6.73  | 86.14  | 215.36 |
| 2321 | 45.250 | 26.750 | 6.87 | 3.61 | 10.13 | 57.24  | 143.10 |
| 2322 | 45.500 | 26.750 | 6.08 | 5.39 | 6.77  | 85.63  | 214.09 |
| 2323 | 45.750 | 26.750 | 5.55 | 5.18 | 5.92  | 97.92  | 244.81 |
| 2324 | 46.000 | 26.750 | 5.34 | 4.17 | 6.51  | 89.05  | 222.63 |

|      |        |        |       |      |       |        |        |
|------|--------|--------|-------|------|-------|--------|--------|
| 2325 | 46.250 | 26.750 | 5.40  | 5.37 | 5.43  | 106.76 | 266.89 |
| 2326 | 46.500 | 26.750 | 6.20  | 5.62 | 6.78  | 85.51  | 213.77 |
| 2327 | 46.750 | 26.750 | 5.73  | 4.06 | 7.40  | 78.35  | 195.87 |
| 2328 | 47.000 | 26.750 | 6.11  | 4.41 | 7.81  | 74.24  | 185.59 |
| 2329 | 47.250 | 26.750 | 5.38  | 4.16 | 6.60  | 87.84  | 219.60 |
| 2330 | 47.500 | 26.750 | 5.62  | 4.56 | 6.68  | 86.79  | 216.97 |
| 2331 | 47.750 | 26.750 | 6.21  | 4.31 | 8.11  | 71.49  | 178.73 |
| 2332 | 48.000 | 26.750 | 5.98  | 3.94 | 8.02  | 72.29  | 180.73 |
| 2333 | 35.000 | 27.000 | 6.77  | 4.71 | 8.83  | 65.66  | 164.16 |
| 2334 | 35.250 | 27.000 | 8.82  | 6.32 | 11.32 | 51.22  | 128.06 |
| 2335 | 35.500 | 27.000 | 7.28  | 4.69 | 9.87  | 58.75  | 146.87 |
| 2336 | 35.750 | 27.000 | 7.81  | 5.19 | 10.43 | 55.59  | 138.98 |
| 2337 | 36.000 | 27.000 | 8.64  | 5.60 | 11.68 | 49.64  | 124.11 |
| 2338 | 36.250 | 27.000 | 8.37  | 5.82 | 10.92 | 53.10  | 132.75 |
| 2339 | 36.500 | 27.000 | 8.74  | 5.34 | 12.14 | 47.76  | 119.41 |
| 2340 | 36.750 | 27.000 | 8.07  | 6.12 | 10.02 | 57.87  | 144.67 |
| 2341 | 37.000 | 27.000 | 7.19  | 5.15 | 9.23  | 62.82  | 157.05 |
| 2342 | 37.250 | 27.000 | 8.19  | 7.10 | 9.28  | 62.48  | 156.20 |
| 2343 | 37.500 | 27.000 | 8.64  | 7.44 | 9.84  | 58.93  | 147.31 |
| 2344 | 37.750 | 27.000 | 8.30  | 6.61 | 9.99  | 58.04  | 145.10 |
| 2345 | 38.000 | 27.000 | 7.97  | 5.60 | 10.34 | 56.08  | 140.19 |
| 2346 | 38.250 | 27.000 | 7.84  | 4.31 | 11.37 | 51.00  | 127.49 |
| 2347 | 38.500 | 27.000 | 8.50  | 6.06 | 10.94 | 53.00  | 132.50 |
| 2348 | 38.750 | 27.000 | 10.28 | 5.75 | 14.81 | 39.15  | 97.89  |
| 2349 | 39.000 | 27.000 | 9.88  | 5.46 | 14.30 | 40.55  | 101.38 |
| 2350 | 39.250 | 27.000 | 9.00  | 5.53 | 12.47 | 46.50  | 116.25 |
| 2351 | 39.500 | 27.000 | 11.28 | 6.95 | 15.61 | 37.15  | 92.87  |
| 2352 | 39.750 | 27.000 | 8.37  | 5.68 | 11.06 | 52.43  | 131.07 |
| 2353 | 40.000 | 27.000 | 10.53 | 7.39 | 13.67 | 42.42  | 106.05 |
| 2354 | 40.250 | 27.000 | 8.84  | 7.23 | 10.45 | 55.49  | 138.72 |
| 2355 | 40.500 | 27.000 | 9.83  | 7.91 | 11.75 | 49.35  | 123.37 |
| 2356 | 40.750 | 27.000 | 10.61 | 6.21 | 15.01 | 38.63  | 96.58  |
| 2357 | 41.000 | 27.000 | 8.04  | 4.50 | 11.58 | 50.07  | 125.18 |
| 2358 | 41.250 | 27.000 | 9.68  | 5.15 | 14.21 | 40.81  | 102.02 |
| 2359 | 41.500 | 27.000 | 9.57  | 5.52 | 13.62 | 42.58  | 106.44 |
| 2360 | 41.750 | 27.000 | 11.05 | 6.55 | 15.55 | 37.29  | 93.23  |
| 2361 | 42.000 | 27.000 | 9.89  | 6.23 | 13.55 | 42.79  | 106.99 |
| 2362 | 42.250 | 27.000 | 10.11 | 6.09 | 14.13 | 41.04  | 102.60 |
| 2363 | 42.500 | 27.000 | 9.68  | 5.90 | 13.46 | 43.08  | 107.70 |
| 2364 | 42.750 | 27.000 | 7.87  | 5.74 | 10.00 | 57.98  | 144.96 |
| 2365 | 43.000 | 27.000 | 8.90  | 5.98 | 11.82 | 49.06  | 122.64 |
| 2366 | 43.250 | 27.000 | 7.69  | 5.98 | 9.40  | 61.68  | 154.21 |
| 2367 | 43.500 | 27.000 | 7.46  | 6.09 | 8.83  | 65.66  | 164.16 |
| 2368 | 43.750 | 27.000 | 7.57  | 5.80 | 9.34  | 62.08  | 155.20 |
| 2369 | 44.000 | 27.000 | 8.17  | 5.89 | 10.45 | 55.49  | 138.72 |
| 2370 | 44.250 | 27.000 | 8.07  | 5.62 | 10.52 | 55.12  | 137.79 |
| 2371 | 44.500 | 27.000 | 7.51  | 4.55 | 10.47 | 55.38  | 138.45 |
| 2372 | 44.750 | 27.000 | 7.99  | 4.73 | 11.25 | 51.54  | 128.85 |
| 2373 | 45.000 | 27.000 | 10.13 | 7.94 | 12.32 | 47.07  | 117.67 |
| 2374 | 45.250 | 27.000 | 9.97  | 5.31 | 14.63 | 39.64  | 99.09  |
| 2375 | 45.500 | 27.000 | 9.86  | 6.79 | 12.93 | 44.85  | 112.12 |
| 2376 | 45.750 | 27.000 | 7.91  | 5.00 | 10.82 | 53.59  | 133.97 |
| 2377 | 46.000 | 27.000 | 8.84  | 7.13 | 10.55 | 54.96  | 137.40 |

|      |        |        |       |      |       |        |        |
|------|--------|--------|-------|------|-------|--------|--------|
| 2378 | 46.250 | 27.000 | 9.79  | 6.28 | 13.30 | 43.60  | 109.00 |
| 2379 | 46.500 | 27.000 | 9.47  | 6.21 | 12.73 | 45.55  | 113.88 |
| 2380 | 46.750 | 27.000 | 9.58  | 5.17 | 13.99 | 41.45  | 103.62 |
| 2381 | 47.000 | 27.000 | 7.83  | 4.99 | 10.67 | 54.34  | 135.86 |
| 2382 | 47.250 | 27.000 | 8.85  | 7.44 | 10.26 | 56.51  | 141.28 |
| 2383 | 47.500 | 27.000 | 8.33  | 5.59 | 11.07 | 52.38  | 130.95 |
| 2384 | 47.750 | 27.000 | 8.03  | 5.94 | 10.12 | 57.30  | 143.24 |
| 2385 | 48.000 | 27.000 | 10.98 | 5.39 | 16.57 | 35.00  | 87.49  |
| 2386 | 35.000 | 27.250 | 6.82  | 5.00 | 8.64  | 67.11  | 167.77 |
| 2387 | 35.250 | 27.250 | 7.57  | 5.31 | 9.83  | 58.99  | 147.46 |
| 2388 | 35.500 | 27.250 | 6.47  | 5.47 | 7.47  | 77.61  | 194.03 |
| 2389 | 35.750 | 27.250 | 6.88  | 5.70 | 8.06  | 71.93  | 179.83 |
| 2390 | 36.000 | 27.250 | 7.29  | 5.80 | 8.78  | 66.04  | 165.09 |
| 2391 | 36.250 | 27.250 | 6.26  | 5.06 | 7.46  | 77.72  | 194.29 |
| 2392 | 36.500 | 27.250 | 6.84  | 5.20 | 8.48  | 68.37  | 170.93 |
| 2393 | 36.750 | 27.250 | 6.57  | 5.42 | 7.72  | 75.10  | 187.75 |
| 2394 | 37.000 | 27.250 | 6.94  | 4.94 | 8.94  | 64.86  | 162.14 |
| 2395 | 37.250 | 27.250 | 6.27  | 5.72 | 6.82  | 85.01  | 212.52 |
| 2396 | 37.500 | 27.250 | 5.39  | 4.75 | 6.03  | 96.14  | 240.34 |
| 2397 | 37.750 | 27.250 | 6.39  | 6.70 | 6.08  | 95.35  | 238.37 |
| 2398 | 38.000 | 27.250 | 6.84  | 7.04 | 6.64  | 87.31  | 218.27 |
| 2399 | 38.250 | 27.250 | 6.50  | 6.21 | 6.79  | 85.38  | 213.46 |
| 2400 | 38.500 | 27.250 | 6.17  | 5.20 | 7.14  | 81.20  | 203.00 |
| 2401 | 38.750 | 27.250 | 6.04  | 3.91 | 8.17  | 70.97  | 177.41 |
| 2402 | 39.000 | 27.250 | 6.70  | 5.66 | 7.74  | 74.91  | 187.27 |
| 2403 | 39.250 | 27.250 | 9.48  | 6.55 | 12.41 | 46.73  | 116.81 |
| 2404 | 39.500 | 27.250 | 6.57  | 5.28 | 7.86  | 73.76  | 184.41 |
| 2405 | 39.750 | 27.250 | 8.73  | 6.99 | 10.47 | 55.38  | 138.45 |
| 2406 | 40.000 | 27.250 | 7.04  | 6.83 | 7.25  | 79.97  | 199.92 |
| 2407 | 40.250 | 27.250 | 8.03  | 7.51 | 8.55  | 67.81  | 169.53 |
| 2408 | 40.500 | 27.250 | 8.81  | 5.81 | 11.81 | 49.10  | 122.75 |
| 2409 | 40.750 | 27.250 | 6.24  | 4.10 | 8.38  | 69.19  | 172.97 |
| 2410 | 41.000 | 27.250 | 7.88  | 4.75 | 11.01 | 52.67  | 131.66 |
| 2411 | 41.250 | 27.250 | 7.77  | 5.12 | 10.42 | 55.65  | 139.12 |
| 2412 | 41.500 | 27.250 | 9.25  | 6.15 | 12.35 | 46.95  | 117.38 |
| 2413 | 41.750 | 27.250 | 8.09  | 5.83 | 10.35 | 56.02  | 140.06 |
| 2414 | 42.000 | 27.250 | 8.31  | 5.69 | 10.93 | 53.05  | 132.63 |
| 2415 | 42.250 | 27.250 | 7.88  | 5.50 | 10.26 | 56.51  | 141.28 |
| 2416 | 42.500 | 27.250 | 6.07  | 5.34 | 6.80  | 85.26  | 213.14 |
| 2417 | 42.750 | 27.250 | 7.10  | 5.58 | 8.62  | 67.26  | 168.15 |
| 2418 | 43.000 | 27.250 | 5.89  | 5.58 | 6.20  | 93.50  | 233.76 |
| 2419 | 43.250 | 27.250 | 5.66  | 5.69 | 5.63  | 102.96 | 257.41 |
| 2420 | 43.500 | 27.250 | 5.77  | 5.40 | 6.14  | 94.42  | 236.04 |
| 2421 | 43.750 | 27.250 | 6.37  | 5.49 | 7.25  | 79.97  | 199.92 |
| 2422 | 44.000 | 27.250 | 6.27  | 5.22 | 7.32  | 79.20  | 198.01 |
| 2423 | 44.250 | 27.250 | 5.71  | 4.15 | 7.27  | 79.75  | 199.37 |
| 2424 | 44.500 | 27.250 | 6.19  | 4.33 | 8.05  | 72.02  | 180.06 |
| 2425 | 44.750 | 27.250 | 8.33  | 7.54 | 9.12  | 63.58  | 158.94 |
| 2426 | 45.000 | 27.250 | 8.37  | 4.40 | 12.34 | 46.99  | 117.48 |
| 2427 | 45.250 | 27.250 | 6.41  | 5.68 | 7.14  | 81.20  | 203.00 |
| 2428 | 45.500 | 27.250 | 8.44  | 5.89 | 10.99 | 52.76  | 131.90 |
| 2429 | 45.750 | 27.250 | 8.17  | 4.91 | 11.43 | 50.73  | 126.83 |
| 2430 | 46.000 | 27.250 | 8.06  | 6.39 | 9.73  | 59.59  | 148.98 |

|      |        |        |      |      |       |        |        |
|------|--------|--------|------|------|-------|--------|--------|
| 2431 | 46.250 | 27.250 | 6.11 | 4.60 | 7.62  | 76.09  | 190.21 |
| 2432 | 46.500 | 27.250 | 7.04 | 6.73 | 7.35  | 78.88  | 197.20 |
| 2433 | 46.750 | 27.250 | 7.99 | 5.88 | 10.10 | 57.41  | 143.52 |
| 2434 | 47.000 | 27.250 | 7.67 | 5.81 | 9.53  | 60.84  | 152.10 |
| 2435 | 47.250 | 27.250 | 7.78 | 4.77 | 10.79 | 53.74  | 134.35 |
| 2436 | 47.500 | 27.250 | 6.03 | 4.59 | 7.47  | 77.61  | 194.03 |
| 2437 | 47.750 | 27.250 | 7.05 | 7.04 | 7.06  | 82.12  | 205.30 |
| 2438 | 48.000 | 27.250 | 6.53 | 5.19 | 7.87  | 73.67  | 184.17 |
| 2439 | 35.000 | 27.500 | 6.82 | 6.02 | 7.62  | 76.09  | 190.21 |
| 2440 | 35.250 | 27.500 | 6.13 | 5.65 | 6.61  | 87.71  | 219.27 |
| 2441 | 35.500 | 27.500 | 6.82 | 5.67 | 7.97  | 72.75  | 181.86 |
| 2442 | 35.750 | 27.500 | 6.37 | 6.27 | 6.47  | 89.60  | 224.01 |
| 2443 | 36.000 | 27.500 | 5.93 | 5.48 | 6.38  | 90.87  | 227.17 |
| 2444 | 36.250 | 27.500 | 5.86 | 5.46 | 6.26  | 92.61  | 231.52 |
| 2445 | 36.500 | 27.500 | 5.57 | 4.89 | 6.25  | 92.76  | 231.89 |
| 2446 | 36.750 | 27.500 | 5.71 | 5.18 | 6.24  | 92.90  | 232.26 |
| 2447 | 37.000 | 27.500 | 5.41 | 5.38 | 5.44  | 106.56 | 266.40 |
| 2448 | 37.250 | 27.500 | 5.87 | 5.68 | 6.06  | 95.66  | 239.16 |
| 2449 | 37.500 | 27.500 | 6.37 | 5.68 | 7.06  | 82.12  | 205.30 |
| 2450 | 37.750 | 27.500 | 6.17 | 5.18 | 7.16  | 80.97  | 202.43 |
| 2451 | 38.000 | 27.500 | 6.28 | 5.84 | 6.72  | 86.27  | 215.68 |
| 2452 | 38.250 | 27.500 | 6.03 | 5.50 | 6.56  | 88.37  | 220.94 |
| 2453 | 38.500 | 27.500 | 6.57 | 5.39 | 7.75  | 74.81  | 187.02 |
| 2454 | 38.750 | 27.500 | 6.46 | 4.25 | 8.67  | 66.87  | 167.19 |
| 2455 | 39.000 | 27.500 | 6.88 | 5.18 | 8.58  | 67.58  | 168.94 |
| 2456 | 39.250 | 27.500 | 6.99 | 5.19 | 8.79  | 65.96  | 164.90 |
| 2457 | 39.500 | 27.500 | 6.49 | 4.70 | 8.28  | 70.02  | 175.06 |
| 2458 | 39.750 | 27.500 | 7.47 | 5.96 | 8.98  | 64.57  | 161.42 |
| 2459 | 40.000 | 27.500 | 5.98 | 5.03 | 6.93  | 83.66  | 209.14 |
| 2460 | 40.250 | 27.500 | 5.79 | 4.66 | 6.92  | 83.78  | 209.45 |
| 2461 | 40.500 | 27.500 | 5.60 | 5.05 | 6.15  | 94.26  | 235.66 |
| 2462 | 40.750 | 27.500 | 5.74 | 5.32 | 6.16  | 94.11  | 235.28 |
| 2463 | 41.000 | 27.500 | 6.59 | 6.86 | 6.32  | 91.73  | 229.32 |
| 2464 | 41.250 | 27.500 | 5.82 | 5.23 | 6.41  | 90.44  | 226.10 |
| 2465 | 41.500 | 27.500 | 5.79 | 5.44 | 6.14  | 94.42  | 236.04 |
| 2466 | 41.750 | 27.500 | 6.69 | 4.92 | 8.46  | 68.53  | 171.33 |
| 2467 | 42.000 | 27.500 | 6.86 | 5.57 | 8.15  | 71.14  | 177.85 |
| 2468 | 42.250 | 27.500 | 5.83 | 5.01 | 6.65  | 87.18  | 217.95 |
| 2469 | 42.500 | 27.500 | 6.30 | 5.43 | 7.17  | 80.86  | 202.15 |
| 2470 | 42.750 | 27.500 | 6.99 | 5.90 | 8.08  | 71.76  | 179.39 |
| 2471 | 43.000 | 27.500 | 6.54 | 4.24 | 8.84  | 65.59  | 163.97 |
| 2472 | 43.250 | 27.500 | 8.16 | 4.57 | 11.75 | 49.35  | 123.37 |
| 2473 | 43.500 | 27.500 | 7.88 | 4.75 | 11.01 | 52.67  | 131.66 |
| 2474 | 43.750 | 27.500 | 6.84 | 6.69 | 6.99  | 82.94  | 207.35 |
| 2475 | 44.000 | 27.500 | 6.64 | 6.09 | 7.19  | 80.63  | 201.58 |
| 2476 | 44.250 | 27.500 | 6.88 | 4.19 | 9.57  | 60.59  | 151.47 |
| 2477 | 44.500 | 27.500 | 7.26 | 4.76 | 9.76  | 59.41  | 148.52 |
| 2478 | 44.750 | 27.500 | 6.32 | 5.09 | 7.55  | 76.79  | 191.98 |
| 2479 | 45.000 | 27.500 | 5.72 | 5.06 | 6.38  | 90.87  | 227.17 |
| 2480 | 45.250 | 27.500 | 6.75 | 4.57 | 8.93  | 64.93  | 162.32 |
| 2481 | 45.500 | 27.500 | 6.29 | 5.39 | 7.19  | 80.63  | 201.58 |
| 2482 | 45.750 | 27.500 | 6.17 | 5.81 | 6.53  | 88.78  | 221.95 |
| 2483 | 46.000 | 27.500 | 7.52 | 4.40 | 10.64 | 54.50  | 136.24 |

|      |        |        |      |      |       |       |        |
|------|--------|--------|------|------|-------|-------|--------|
| 2484 | 46.250 | 27.500 | 6.57 | 4.41 | 8.73  | 66.41 | 166.04 |
| 2485 | 46.500 | 27.500 | 5.96 | 4.02 | 7.90  | 73.39 | 183.47 |
| 2486 | 46.750 | 27.500 | 5.84 | 4.96 | 6.72  | 86.27 | 215.68 |
| 2487 | 47.000 | 27.500 | 6.07 | 5.33 | 6.81  | 85.13 | 212.83 |
| 2488 | 47.250 | 27.500 | 6.28 | 5.66 | 6.90  | 84.02 | 210.05 |
| 2489 | 47.500 | 27.500 | 6.30 | 5.99 | 6.61  | 87.71 | 219.27 |
| 2490 | 47.750 | 27.500 | 6.69 | 4.76 | 8.62  | 67.26 | 168.15 |
| 2491 | 48.000 | 27.500 | 6.15 | 5.53 | 6.77  | 85.63 | 214.09 |
| 2492 | 35.000 | 27.750 | 6.99 | 6.01 | 7.97  | 72.75 | 181.86 |
| 2493 | 35.250 | 27.750 | 6.42 | 5.89 | 6.95  | 83.42 | 208.54 |
| 2494 | 35.500 | 27.750 | 6.82 | 5.07 | 8.57  | 67.65 | 169.14 |
| 2495 | 35.750 | 27.750 | 7.57 | 5.80 | 9.34  | 62.08 | 155.20 |
| 2496 | 36.000 | 27.750 | 6.47 | 5.19 | 7.75  | 74.81 | 187.02 |
| 2497 | 36.250 | 27.750 | 6.88 | 4.82 | 8.94  | 64.86 | 162.14 |
| 2498 | 36.500 | 27.750 | 7.29 | 4.21 | 10.37 | 55.91 | 139.79 |
| 2499 | 36.750 | 27.750 | 6.26 | 5.34 | 7.18  | 80.75 | 201.87 |
| 2500 | 37.000 | 27.750 | 6.84 | 5.39 | 8.29  | 69.94 | 174.85 |
| 2501 | 37.250 | 27.750 | 6.57 | 4.88 | 8.26  | 70.19 | 175.48 |
| 2502 | 37.500 | 27.750 | 6.94 | 5.65 | 8.23  | 70.45 | 176.12 |
| 2503 | 37.750 | 27.750 | 7.27 | 6.63 | 7.91  | 73.30 | 183.24 |
| 2504 | 38.000 | 27.750 | 6.35 | 5.45 | 7.25  | 79.97 | 199.92 |
| 2505 | 38.250 | 27.750 | 7.19 | 5.26 | 9.12  | 63.58 | 158.94 |
| 2506 | 38.500 | 27.750 | 7.84 | 4.99 | 10.69 | 54.24 | 135.60 |
| 2507 | 38.750 | 27.750 | 7.50 | 4.84 | 10.16 | 57.07 | 142.67 |
| 2508 | 39.000 | 27.750 | 6.17 | 5.31 | 7.03  | 82.47 | 206.17 |
| 2509 | 39.250 | 27.750 | 6.04 | 4.83 | 7.25  | 79.97 | 199.92 |
| 2510 | 39.500 | 27.750 | 6.70 | 4.94 | 8.46  | 68.53 | 171.33 |
| 2511 | 39.750 | 27.750 | 8.48 | 4.52 | 12.44 | 46.61 | 116.53 |
| 2512 | 40.000 | 27.750 | 8.08 | 4.44 | 11.72 | 49.48 | 123.69 |
| 2513 | 40.250 | 27.750 | 7.20 | 5.29 | 9.11  | 63.65 | 159.11 |
| 2514 | 40.500 | 27.750 | 6.19 | 5.34 | 7.04  | 82.35 | 205.88 |
| 2515 | 40.750 | 27.750 | 7.33 | 5.39 | 9.27  | 62.55 | 156.37 |
| 2516 | 41.000 | 27.750 | 9.43 | 4.88 | 13.98 | 41.48 | 103.70 |
| 2517 | 41.250 | 27.750 | 6.41 | 5.65 | 7.17  | 80.86 | 202.15 |
| 2518 | 41.500 | 27.750 | 6.36 | 6.63 | 6.09  | 95.19 | 237.98 |
| 2519 | 41.750 | 27.750 | 6.63 | 4.69 | 8.57  | 67.65 | 169.14 |
| 2520 | 42.000 | 27.750 | 7.46 | 4.33 | 10.59 | 54.75 | 136.88 |
| 2521 | 42.250 | 27.750 | 7.20 | 5.14 | 9.26  | 62.61 | 156.54 |
| 2522 | 42.500 | 27.750 | 8.92 | 3.61 | 14.23 | 40.75 | 101.88 |
| 2523 | 42.750 | 27.750 | 5.38 | 2.41 | 8.35  | 69.44 | 173.59 |
| 2524 | 43.000 | 27.750 | 8.44 | 3.23 | 13.65 | 42.48 | 106.20 |
| 2525 | 43.250 | 27.750 | 6.38 | 3.57 | 9.19  | 63.09 | 157.73 |
| 2526 | 43.500 | 27.750 | 7.42 | 3.73 | 11.11 | 52.19 | 130.48 |
| 2527 | 43.750 | 27.750 | 5.63 | 3.44 | 7.82  | 74.14 | 185.35 |
| 2528 | 44.000 | 27.750 | 5.43 | 3.26 | 7.60  | 76.29 | 190.71 |
| 2529 | 44.250 | 27.750 | 6.53 | 4.74 | 8.32  | 69.69 | 174.22 |
| 2530 | 44.500 | 27.750 | 7.46 | 5.23 | 9.69  | 59.84 | 149.59 |
| 2531 | 44.750 | 27.750 | 6.66 | 3.12 | 10.20 | 56.85 | 142.12 |
| 2532 | 45.000 | 27.750 | 6.52 | 2.80 | 10.24 | 56.62 | 141.56 |
| 2533 | 45.250 | 27.750 | 5.47 | 2.99 | 7.95  | 72.93 | 182.32 |
| 2534 | 45.500 | 27.750 | 6.10 | 3.48 | 8.72  | 66.49 | 166.23 |
| 2535 | 45.750 | 27.750 | 6.89 | 3.49 | 10.29 | 56.35 | 140.87 |
| 2536 | 46.000 | 27.750 | 5.36 | 3.46 | 7.26  | 79.86 | 199.64 |



|      |        |        |       |      |       |       |        |
|------|--------|--------|-------|------|-------|-------|--------|
| 2537 | 46.250 | 27.750 | 6.11  | 4.10 | 8.12  | 71.40 | 178.51 |
| 2538 | 46.500 | 27.750 | 7.00  | 4.87 | 9.13  | 63.51 | 158.76 |
| 2539 | 46.750 | 27.750 | 6.14  | 4.38 | 7.90  | 73.39 | 183.47 |
| 2540 | 47.000 | 27.750 | 5.71  | 3.82 | 7.60  | 76.29 | 190.71 |
| 2541 | 47.250 | 27.750 | 6.11  | 4.05 | 8.17  | 70.97 | 177.41 |
| 2542 | 47.500 | 27.750 | 6.39  | 3.56 | 9.22  | 62.89 | 157.22 |
| 2543 | 47.750 | 27.750 | 6.47  | 2.89 | 10.05 | 57.69 | 144.24 |
| 2544 | 48.000 | 27.750 | 5.58  | 3.23 | 7.93  | 73.11 | 182.78 |
| 2545 | 35.000 | 28.000 | 5.57  | 4.00 | 7.14  | 81.20 | 203.00 |
| 2546 | 35.250 | 28.000 | 6.63  | 3.75 | 9.51  | 60.97 | 152.42 |
| 2547 | 35.500 | 28.000 | 7.93  | 4.45 | 11.41 | 50.82 | 127.05 |
| 2548 | 35.750 | 28.000 | 7.35  | 3.83 | 10.87 | 53.34 | 133.36 |
| 2549 | 36.000 | 28.000 | 7.12  | 3.69 | 10.55 | 54.96 | 137.40 |
| 2550 | 36.250 | 28.000 | 5.48  | 3.41 | 7.55  | 76.79 | 191.98 |
| 2551 | 36.500 | 28.000 | 6.48  | 2.94 | 10.02 | 57.87 | 144.67 |
| 2552 | 36.750 | 28.000 | 5.96  | 3.60 | 8.32  | 69.69 | 174.22 |
| 2553 | 37.000 | 28.000 | 5.54  | 3.50 | 7.58  | 76.49 | 191.22 |
| 2554 | 37.250 | 28.000 | 9.20  | 5.07 | 13.33 | 43.50 | 108.75 |
| 2555 | 37.500 | 28.000 | 7.47  | 3.42 | 11.52 | 50.33 | 125.84 |
| 2556 | 37.750 | 28.000 | 8.50  | 3.53 | 13.47 | 43.05 | 107.62 |
| 2557 | 38.000 | 28.000 | 6.75  | 3.53 | 9.97  | 58.16 | 145.39 |
| 2558 | 38.250 | 28.000 | 5.36  | 3.37 | 7.35  | 78.88 | 197.20 |
| 2559 | 38.500 | 28.000 | 5.77  | 4.29 | 7.25  | 79.97 | 199.92 |
| 2560 | 38.750 | 28.000 | 7.34  | 4.69 | 9.99  | 58.03 | 145.09 |
| 2561 | 39.000 | 28.000 | 7.99  | 4.73 | 11.25 | 51.54 | 128.85 |
| 2562 | 39.250 | 28.000 | 10.13 | 7.94 | 12.32 | 47.07 | 117.67 |
| 2563 | 39.500 | 28.000 | 10.17 | 4.80 | 15.54 | 37.32 | 93.29  |
| 2564 | 39.750 | 28.000 | 8.21  | 6.08 | 10.34 | 56.08 | 140.19 |
| 2565 | 40.000 | 28.000 | 10.24 | 6.29 | 14.19 | 40.87 | 102.16 |
| 2566 | 40.250 | 28.000 | 9.97  | 5.31 | 14.63 | 39.64 | 99.09  |
| 2567 | 40.500 | 28.000 | 9.86  | 6.79 | 12.93 | 44.85 | 112.12 |
| 2568 | 40.750 | 28.000 | 7.91  | 5.00 | 10.82 | 53.59 | 133.97 |
| 2569 | 41.000 | 28.000 | 8.84  | 7.13 | 10.55 | 54.96 | 137.40 |
| 2570 | 41.250 | 28.000 | 9.79  | 6.28 | 13.30 | 43.60 | 109.00 |
| 2571 | 41.500 | 28.000 | 9.47  | 6.21 | 12.73 | 45.55 | 113.88 |
| 2572 | 41.750 | 28.000 | 9.58  | 5.17 | 13.99 | 41.45 | 103.62 |
| 2573 | 42.000 | 28.000 | 7.83  | 4.99 | 10.67 | 54.34 | 135.86 |
| 2574 | 42.250 | 28.000 | 8.85  | 7.44 | 10.26 | 56.51 | 141.28 |
| 2575 | 42.500 | 28.000 | 8.33  | 5.59 | 11.07 | 52.38 | 130.95 |
| 2576 | 42.750 | 28.000 | 8.03  | 5.94 | 10.12 | 57.30 | 143.24 |
| 2577 | 43.000 | 28.000 | 10.98 | 5.39 | 16.57 | 35.00 | 87.49  |
| 2578 | 43.250 | 28.000 | 10.25 | 5.98 | 14.52 | 39.94 | 99.84  |
| 2579 | 43.500 | 28.000 | 10.66 | 5.08 | 16.24 | 35.71 | 89.27  |
| 2580 | 43.750 | 28.000 | 8.87  | 5.98 | 11.76 | 49.31 | 123.27 |
| 2581 | 44.000 | 28.000 | 8.08  | 4.49 | 11.67 | 49.69 | 124.22 |
| 2582 | 44.250 | 28.000 | 7.79  | 4.87 | 10.71 | 54.14 | 135.35 |
| 2583 | 44.500 | 28.000 | 8.56  | 5.04 | 12.08 | 48.00 | 120.00 |
| 2584 | 44.750 | 28.000 | 8.06  | 6.50 | 9.62  | 60.27 | 150.68 |
| 2585 | 45.000 | 28.000 | 8.87  | 6.05 | 11.69 | 49.60 | 124.01 |
| 2586 | 45.250 | 28.000 | 9.00  | 6.45 | 11.55 | 50.20 | 125.51 |
| 2587 | 45.500 | 28.000 | 7.41  | 6.36 | 8.46  | 68.53 | 171.33 |
| 2588 | 45.750 | 28.000 | 8.38  | 5.66 | 11.10 | 52.24 | 130.60 |
| 2589 | 46.000 | 28.000 | 7.02  | 5.81 | 8.23  | 70.45 | 176.12 |

|      |        |        |      |      |       |        |        |
|------|--------|--------|------|------|-------|--------|--------|
| 2590 | 46.250 | 28.000 | 5.65 | 5.25 | 6.05  | 95.82  | 239.55 |
| 2591 | 46.500 | 28.000 | 5.56 | 4.98 | 6.14  | 94.42  | 236.04 |
| 2592 | 46.750 | 28.000 | 5.51 | 5.07 | 5.95  | 97.43  | 243.57 |
| 2593 | 47.000 | 28.000 | 6.91 | 7.21 | 6.61  | 87.71  | 219.27 |
| 2594 | 47.250 | 28.000 | 6.72 | 5.35 | 8.09  | 71.67  | 179.17 |
| 2595 | 47.500 | 28.000 | 7.00 | 5.53 | 8.47  | 68.45  | 171.13 |
| 2596 | 47.750 | 28.000 | 6.69 | 4.92 | 8.46  | 68.53  | 171.33 |
| 2597 | 48.000 | 28.000 | 6.86 | 5.57 | 8.15  | 71.14  | 177.85 |
| 2598 | 35.000 | 28.250 | 6.14 | 4.52 | 7.76  | 74.71  | 186.78 |
| 2599 | 35.250 | 28.250 | 6.62 | 4.44 | 8.80  | 65.89  | 164.72 |
| 2600 | 35.500 | 28.250 | 7.07 | 5.29 | 8.85  | 65.51  | 163.79 |
| 2601 | 35.750 | 28.250 | 7.22 | 5.66 | 8.78  | 66.04  | 165.09 |
| 2602 | 36.000 | 28.250 | 9.12 | 5.29 | 12.95 | 44.78  | 111.94 |
| 2603 | 36.250 | 28.250 | 7.56 | 6.39 | 8.73  | 66.41  | 166.04 |
| 2604 | 36.500 | 28.250 | 8.66 | 5.54 | 11.78 | 49.22  | 123.06 |
| 2605 | 36.750 | 28.250 | 9.71 | 5.40 | 14.02 | 41.36  | 103.40 |
| 2606 | 37.000 | 28.250 | 6.54 | 5.06 | 8.02  | 72.29  | 180.73 |
| 2607 | 37.250 | 28.250 | 8.86 | 4.81 | 12.91 | 44.92  | 112.29 |
| 2608 | 37.500 | 28.250 | 7.13 | 5.39 | 8.87  | 65.37  | 163.42 |
| 2609 | 37.750 | 28.250 | 8.15 | 5.66 | 10.64 | 54.50  | 136.24 |
| 2610 | 38.000 | 28.250 | 5.93 | 6.19 | 5.67  | 102.24 | 255.60 |
| 2611 | 38.250 | 28.250 | 6.54 | 5.70 | 7.38  | 78.56  | 196.40 |
| 2612 | 38.500 | 28.250 | 6.86 | 5.80 | 7.92  | 73.20  | 183.01 |
| 2613 | 38.750 | 28.250 | 8.21 | 5.35 | 11.07 | 52.38  | 130.95 |
| 2614 | 39.000 | 28.250 | 7.46 | 5.15 | 9.77  | 59.35  | 148.37 |
| 2615 | 39.250 | 28.250 | 6.99 | 6.01 | 7.97  | 72.75  | 181.86 |
| 2616 | 39.500 | 28.250 | 6.42 | 5.89 | 6.95  | 83.42  | 208.54 |
| 2617 | 39.750 | 28.250 | 6.82 | 5.07 | 8.57  | 67.65  | 169.14 |
| 2618 | 40.000 | 28.250 | 7.57 | 5.80 | 9.34  | 62.08  | 155.20 |
| 2619 | 40.250 | 28.250 | 6.47 | 5.19 | 7.75  | 74.81  | 187.02 |
| 2620 | 40.500 | 28.250 | 6.88 | 4.82 | 8.94  | 64.86  | 162.14 |
| 2621 | 40.750 | 28.250 | 7.29 | 4.21 | 10.37 | 55.91  | 139.79 |
| 2622 | 41.000 | 28.250 | 6.26 | 5.34 | 7.18  | 80.75  | 201.87 |
| 2623 | 41.250 | 28.250 | 6.84 | 5.39 | 8.29  | 69.94  | 174.85 |
| 2624 | 41.500 | 28.250 | 7.10 | 6.01 | 8.19  | 70.79  | 176.98 |
| 2625 | 41.750 | 28.250 | 5.95 | 5.89 | 6.01  | 96.46  | 241.14 |
| 2626 | 42.000 | 28.250 | 6.16 | 5.07 | 7.25  | 79.97  | 199.92 |
| 2627 | 42.250 | 28.250 | 6.91 | 5.80 | 8.02  | 72.29  | 180.73 |
| 2628 | 42.500 | 28.250 | 5.57 | 4.69 | 6.45  | 89.88  | 224.70 |
| 2629 | 42.750 | 28.250 | 6.36 | 5.40 | 7.32  | 79.20  | 198.01 |
| 2630 | 43.000 | 28.250 | 5.71 | 4.21 | 7.21  | 80.41  | 201.03 |
| 2631 | 43.250 | 28.250 | 6.19 | 5.34 | 7.04  | 82.35  | 205.88 |
| 2632 | 43.500 | 28.250 | 7.33 | 5.39 | 9.27  | 62.55  | 156.37 |
| 2633 | 43.750 | 28.250 | 9.43 | 4.88 | 13.98 | 41.48  | 103.70 |
| 2634 | 44.000 | 28.250 | 6.41 | 5.65 | 7.17  | 80.86  | 202.15 |
| 2635 | 44.250 | 28.250 | 6.36 | 6.63 | 6.09  | 95.19  | 237.98 |
| 2636 | 44.500 | 28.250 | 6.63 | 4.69 | 8.57  | 67.65  | 169.14 |
| 2637 | 44.750 | 28.250 | 7.46 | 4.33 | 10.59 | 54.75  | 136.88 |
| 2638 | 45.000 | 28.250 | 7.20 | 5.14 | 9.26  | 62.61  | 156.54 |
| 2639 | 45.250 | 28.250 | 8.92 | 3.61 | 14.23 | 40.75  | 101.88 |
| 2640 | 45.500 | 28.250 | 5.38 | 2.41 | 8.35  | 69.44  | 173.59 |
| 2641 | 45.750 | 28.250 | 8.44 | 3.23 | 13.65 | 42.48  | 106.20 |
| 2642 | 46.000 | 28.250 | 6.38 | 3.57 | 9.19  | 63.09  | 157.73 |

|      |        |        |      |      |       |       |        |
|------|--------|--------|------|------|-------|-------|--------|
| 2643 | 46.250 | 28.250 | 7.42 | 3.73 | 11.11 | 52.19 | 130.48 |
| 2644 | 46.500 | 28.250 | 5.63 | 3.44 | 7.82  | 74.14 | 185.35 |
| 2645 | 46.750 | 28.250 | 5.43 | 3.26 | 7.60  | 76.29 | 190.71 |
| 2646 | 47.000 | 28.250 | 6.53 | 4.74 | 8.32  | 69.69 | 174.22 |
| 2647 | 47.250 | 28.250 | 7.46 | 5.23 | 9.69  | 59.84 | 149.59 |
| 2648 | 47.500 | 28.250 | 6.66 | 3.12 | 10.20 | 56.85 | 142.12 |
| 2649 | 47.750 | 28.250 | 6.52 | 2.80 | 10.24 | 56.62 | 141.56 |
| 2650 | 48.000 | 28.250 | 5.47 | 2.99 | 7.95  | 72.93 | 182.32 |
| 2651 | 35.000 | 28.500 | 6.70 | 4.44 | 8.96  | 64.71 | 161.78 |
| 2652 | 35.250 | 28.500 | 6.16 | 4.13 | 8.19  | 70.79 | 176.98 |
| 2653 | 35.500 | 28.500 | 7.84 | 3.87 | 11.81 | 49.10 | 122.75 |
| 2654 | 35.750 | 28.500 | 7.74 | 5.83 | 9.65  | 60.08 | 150.21 |
| 2655 | 36.000 | 28.500 | 7.50 | 3.86 | 11.14 | 52.05 | 130.13 |
| 2656 | 36.250 | 28.500 | 5.57 | 4.00 | 7.14  | 81.20 | 203.00 |
| 2657 | 36.500 | 28.500 | 6.63 | 3.75 | 9.51  | 60.97 | 152.42 |
| 2658 | 36.750 | 28.500 | 6.18 | 5.04 | 7.32  | 79.20 | 198.01 |
| 2659 | 37.000 | 28.500 | 5.55 | 4.65 | 6.45  | 89.88 | 224.70 |
| 2660 | 37.250 | 28.500 | 7.21 | 4.40 | 10.02 | 57.87 | 144.67 |
| 2661 | 37.500 | 28.500 | 6.79 | 4.59 | 8.99  | 64.49 | 161.24 |
| 2662 | 37.750 | 28.500 | 6.70 | 3.83 | 9.57  | 60.59 | 151.47 |
| 2663 | 38.000 | 28.500 | 6.04 | 3.46 | 8.62  | 67.26 | 168.15 |
| 2664 | 38.250 | 28.500 | 6.00 | 3.27 | 8.73  | 66.41 | 166.04 |
| 2665 | 38.500 | 28.500 | 6.09 | 3.47 | 8.71  | 66.57 | 166.42 |
| 2666 | 38.750 | 28.500 | 6.16 | 3.66 | 8.66  | 66.95 | 167.38 |
| 2667 | 39.000 | 28.500 | 6.28 | 3.48 | 9.08  | 63.86 | 159.64 |
| 2668 | 39.250 | 28.500 | 5.56 | 3.30 | 7.82  | 74.14 | 185.35 |
| 2669 | 39.500 | 28.500 | 6.13 | 3.22 | 9.04  | 64.14 | 160.35 |
| 2670 | 39.750 | 28.500 | 6.75 | 2.57 | 10.93 | 53.05 | 132.63 |
| 2671 | 40.000 | 28.500 | 5.52 | 3.57 | 7.47  | 77.61 | 194.03 |
| 2672 | 40.250 | 28.500 | 6.61 | 3.97 | 9.25  | 62.68 | 156.71 |
| 2673 | 40.500 | 28.500 | 6.99 | 4.32 | 9.66  | 60.02 | 150.06 |
| 2674 | 40.750 | 28.500 | 5.66 | 3.28 | 8.04  | 72.11 | 180.28 |
| 2675 | 41.000 | 28.500 | 5.84 | 3.41 | 8.27  | 70.11 | 175.27 |
| 2676 | 41.250 | 28.500 | 5.51 | 3.57 | 7.45  | 77.82 | 194.55 |
| 2677 | 41.500 | 28.500 | 6.09 | 2.97 | 9.21  | 62.95 | 157.39 |
| 2678 | 41.750 | 28.500 | 5.69 | 4.47 | 6.91  | 83.90 | 209.75 |
| 2679 | 42.000 | 28.500 | 5.54 | 3.53 | 7.55  | 76.79 | 191.98 |
| 2680 | 42.250 | 28.500 | 5.60 | 3.76 | 7.44  | 77.93 | 194.81 |
| 2681 | 42.500 | 28.500 | 6.61 | 3.10 | 10.12 | 57.30 | 143.24 |
| 2682 | 42.750 | 28.500 | 6.00 | 3.74 | 8.26  | 70.19 | 175.48 |
| 2683 | 43.000 | 28.500 | 7.65 | 5.66 | 9.64  | 60.15 | 150.37 |
| 2684 | 43.250 | 28.500 | 6.71 | 3.38 | 10.04 | 57.75 | 144.38 |
| 2685 | 43.500 | 28.500 | 6.90 | 3.85 | 9.95  | 58.27 | 145.68 |
| 2686 | 43.750 | 28.500 | 6.96 | 3.48 | 10.44 | 55.54 | 138.85 |
| 2687 | 44.000 | 28.500 | 6.09 | 2.91 | 9.27  | 62.55 | 156.37 |
| 2688 | 44.250 | 28.500 | 5.98 | 5.24 | 6.72  | 86.27 | 215.68 |
| 2689 | 44.500 | 28.500 | 6.75 | 5.07 | 8.43  | 68.78 | 171.94 |
| 2690 | 44.750 | 28.500 | 5.65 | 3.19 | 8.11  | 71.49 | 178.73 |
| 2691 | 45.000 | 28.500 | 5.70 | 3.35 | 8.05  | 72.02 | 180.06 |
| 2692 | 45.250 | 28.500 | 6.53 | 3.55 | 9.51  | 60.97 | 152.42 |
| 2693 | 45.500 | 28.500 | 6.05 | 4.86 | 7.24  | 80.08 | 200.19 |
| 2694 | 45.750 | 28.500 | 7.39 | 3.28 | 11.50 | 50.42 | 126.05 |
| 2695 | 46.000 | 28.500 | 7.26 | 3.90 | 10.62 | 54.60 | 136.50 |

|      |        |        |       |      |       |        |        |
|------|--------|--------|-------|------|-------|--------|--------|
| 2696 | 46.250 | 28.500 | 6.29  | 4.67 | 7.91  | 73.30  | 183.24 |
| 2697 | 46.500 | 28.500 | 5.84  | 2.59 | 9.09  | 63.79  | 159.46 |
| 2698 | 46.750 | 28.500 | 6.35  | 3.20 | 9.50  | 61.03  | 152.58 |
| 2699 | 47.000 | 28.500 | 7.02  | 2.66 | 11.38 | 50.95  | 127.38 |
| 2700 | 47.250 | 28.500 | 6.01  | 5.72 | 6.30  | 92.02  | 230.05 |
| 2701 | 47.500 | 28.500 | 5.11  | 4.77 | 5.45  | 106.36 | 265.91 |
| 2702 | 47.750 | 28.500 | 5.48  | 5.08 | 5.88  | 98.59  | 246.47 |
| 2703 | 48.000 | 28.500 | 5.38  | 4.76 | 6.00  | 96.62  | 241.55 |
| 2704 | 35.000 | 28.750 | 8.64  | 7.44 | 9.84  | 58.93  | 147.31 |
| 2705 | 35.250 | 28.750 | 8.30  | 6.61 | 9.99  | 58.04  | 145.10 |
| 2706 | 35.500 | 28.750 | 7.97  | 5.60 | 10.34 | 56.08  | 140.19 |
| 2707 | 35.750 | 28.750 | 7.84  | 4.31 | 11.37 | 51.00  | 127.49 |
| 2708 | 36.000 | 28.750 | 8.50  | 6.06 | 10.94 | 53.00  | 132.50 |
| 2709 | 36.250 | 28.750 | 10.28 | 5.75 | 14.81 | 39.15  | 97.89  |
| 2710 | 36.500 | 28.750 | 9.88  | 5.46 | 14.30 | 40.55  | 101.38 |
| 2711 | 36.750 | 28.750 | 9.00  | 5.53 | 12.47 | 46.50  | 116.25 |
| 2712 | 37.000 | 28.750 | 11.28 | 6.95 | 15.61 | 37.15  | 92.87  |
| 2713 | 37.250 | 28.750 | 8.37  | 5.68 | 11.06 | 52.43  | 131.07 |
| 2714 | 37.500 | 28.750 | 10.53 | 7.39 | 13.67 | 42.42  | 106.05 |
| 2715 | 37.750 | 28.750 | 8.84  | 7.23 | 10.45 | 55.49  | 138.72 |
| 2716 | 38.000 | 28.750 | 9.83  | 7.91 | 11.75 | 49.35  | 123.37 |
| 2717 | 38.250 | 28.750 | 10.61 | 6.21 | 15.01 | 38.63  | 96.58  |
| 2718 | 38.500 | 28.750 | 8.04  | 4.50 | 11.58 | 50.07  | 125.18 |
| 2719 | 38.750 | 28.750 | 9.68  | 5.15 | 14.21 | 40.81  | 102.02 |
| 2720 | 39.000 | 28.750 | 9.57  | 5.52 | 13.62 | 42.58  | 106.44 |
| 2721 | 39.250 | 28.750 | 11.05 | 6.55 | 15.55 | 37.29  | 93.23  |
| 2722 | 39.500 | 28.750 | 9.89  | 6.23 | 13.55 | 42.79  | 106.99 |
| 2723 | 39.750 | 28.750 | 10.11 | 6.09 | 14.13 | 41.04  | 102.60 |
| 2724 | 40.000 | 28.750 | 10.98 | 5.39 | 16.57 | 35.00  | 87.49  |
| 2725 | 40.250 | 28.750 | 10.25 | 5.98 | 14.52 | 39.94  | 99.84  |
| 2726 | 40.500 | 28.750 | 10.66 | 5.08 | 16.24 | 35.71  | 89.27  |
| 2727 | 40.750 | 28.750 | 8.87  | 5.98 | 11.76 | 49.31  | 123.27 |
| 2728 | 41.000 | 28.750 | 8.08  | 4.49 | 11.67 | 49.69  | 124.22 |
| 2729 | 41.250 | 28.750 | 7.79  | 4.87 | 10.71 | 54.14  | 135.35 |
| 2730 | 41.500 | 28.750 | 8.56  | 5.04 | 12.08 | 48.00  | 120.00 |
| 2731 | 41.750 | 28.750 | 8.06  | 6.50 | 9.62  | 60.27  | 150.68 |
| 2732 | 42.000 | 28.750 | 8.87  | 6.05 | 11.69 | 49.60  | 124.01 |
| 2733 | 42.250 | 28.750 | 9.00  | 6.45 | 11.55 | 50.20  | 125.51 |
| 2734 | 42.500 | 28.750 | 7.41  | 6.36 | 8.46  | 68.53  | 171.33 |
| 2735 | 42.750 | 28.750 | 8.38  | 5.66 | 11.10 | 52.24  | 130.60 |
| 2736 | 43.000 | 28.750 | 7.02  | 5.81 | 8.23  | 70.45  | 176.12 |
| 2737 | 43.250 | 28.750 | 9.71  | 3.81 | 15.61 | 37.15  | 92.87  |
| 2738 | 43.500 | 28.750 | 6.54  | 5.86 | 7.22  | 80.30  | 200.75 |
| 2739 | 43.750 | 28.750 | 6.86  | 5.62 | 8.10  | 71.58  | 178.95 |
| 2740 | 44.000 | 28.750 | 7.13  | 5.76 | 8.50  | 68.21  | 170.53 |
| 2741 | 44.250 | 28.750 | 7.15  | 5.28 | 9.02  | 64.28  | 160.70 |
| 2742 | 44.500 | 28.750 | 5.93  | 4.73 | 7.13  | 81.31  | 203.28 |
| 2743 | 44.750 | 28.750 | 6.54  | 5.07 | 8.01  | 72.38  | 180.96 |
| 2744 | 45.000 | 28.750 | 6.86  | 6.01 | 7.71  | 75.20  | 187.99 |
| 2745 | 45.250 | 28.750 | 8.21  | 6.65 | 9.77  | 59.35  | 148.37 |
| 2746 | 45.500 | 28.750 | 7.46  | 4.01 | 10.91 | 53.15  | 132.87 |
| 2747 | 45.750 | 28.750 | 6.99  | 4.29 | 9.69  | 59.84  | 149.59 |
| 2748 | 46.000 | 28.750 | 6.42  | 4.45 | 8.39  | 69.11  | 172.76 |

|      |        |        |      |      |       |        |        |
|------|--------|--------|------|------|-------|--------|--------|
| 2749 | 46.250 | 28.750 | 6.82 | 5.00 | 8.64  | 67.11  | 167.77 |
| 2750 | 46.500 | 28.750 | 7.57 | 5.31 | 9.83  | 58.99  | 147.46 |
| 2751 | 46.750 | 28.750 | 6.47 | 5.47 | 7.47  | 77.61  | 194.03 |
| 2752 | 47.000 | 28.750 | 6.88 | 5.70 | 8.06  | 71.93  | 179.83 |
| 2753 | 47.250 | 28.750 | 7.29 | 5.80 | 8.78  | 66.04  | 165.09 |
| 2754 | 47.500 | 28.750 | 8.31 | 5.69 | 10.93 | 53.05  | 132.63 |
| 2755 | 47.750 | 28.750 | 7.88 | 5.50 | 10.26 | 56.51  | 141.28 |
| 2756 | 48.000 | 28.750 | 6.07 | 5.34 | 6.80  | 85.26  | 213.14 |
| 2757 | 35.000 | 29.000 | 8.45 | 5.58 | 11.32 | 51.22  | 128.06 |
| 2758 | 35.250 | 29.000 | 8.86 | 4.68 | 13.04 | 44.47  | 111.17 |
| 2759 | 35.500 | 29.000 | 7.07 | 5.58 | 8.56  | 67.73  | 169.33 |
| 2760 | 35.750 | 29.000 | 6.82 | 6.02 | 7.62  | 76.09  | 190.21 |
| 2761 | 36.000 | 29.000 | 6.13 | 5.65 | 6.61  | 87.71  | 219.27 |
| 2762 | 36.250 | 29.000 | 6.82 | 5.67 | 7.97  | 72.75  | 181.86 |
| 2763 | 36.500 | 29.000 | 6.37 | 6.27 | 6.47  | 89.60  | 224.01 |
| 2764 | 36.750 | 29.000 | 5.93 | 5.48 | 6.38  | 90.87  | 227.17 |
| 2765 | 37.000 | 29.000 | 5.86 | 5.46 | 6.26  | 92.61  | 231.52 |
| 2766 | 37.250 | 29.000 | 5.57 | 4.89 | 6.25  | 92.76  | 231.89 |
| 2767 | 37.500 | 29.000 | 5.71 | 5.18 | 6.24  | 92.90  | 232.26 |
| 2768 | 37.750 | 29.000 | 5.41 | 5.38 | 5.44  | 106.56 | 266.40 |
| 2769 | 38.000 | 29.000 | 5.87 | 5.68 | 6.06  | 95.66  | 239.16 |
| 2770 | 38.250 | 29.000 | 6.37 | 5.68 | 7.06  | 82.12  | 205.30 |
| 2771 | 38.500 | 29.000 | 6.17 | 5.18 | 7.16  | 80.97  | 202.43 |
| 2772 | 38.750 | 29.000 | 6.28 | 5.84 | 6.72  | 86.27  | 215.68 |
| 2773 | 39.000 | 29.000 | 6.03 | 5.50 | 6.56  | 88.37  | 220.94 |
| 2774 | 39.250 | 29.000 | 6.57 | 5.39 | 7.75  | 74.81  | 187.02 |
| 2775 | 39.500 | 29.000 | 6.46 | 4.25 | 8.67  | 66.87  | 167.19 |
| 2776 | 39.750 | 29.000 | 6.88 | 5.18 | 8.58  | 67.58  | 168.94 |
| 2777 | 40.000 | 29.000 | 6.99 | 5.19 | 8.79  | 65.96  | 164.90 |
| 2778 | 40.250 | 29.000 | 6.49 | 4.70 | 8.28  | 70.02  | 175.06 |
| 2779 | 40.500 | 29.000 | 7.47 | 5.96 | 8.98  | 64.57  | 161.42 |
| 2780 | 40.750 | 29.000 | 5.98 | 5.03 | 6.93  | 83.66  | 209.14 |
| 2781 | 41.000 | 29.000 | 5.79 | 4.66 | 6.92  | 83.78  | 209.45 |
| 2782 | 41.250 | 29.000 | 5.60 | 5.05 | 6.15  | 94.26  | 235.66 |
| 2783 | 41.500 | 29.000 | 5.74 | 5.32 | 6.16  | 94.11  | 235.28 |
| 2784 | 41.750 | 29.000 | 6.59 | 6.86 | 6.32  | 91.73  | 229.32 |
| 2785 | 42.000 | 29.000 | 5.82 | 5.23 | 6.41  | 90.44  | 226.10 |
| 2786 | 42.250 | 29.000 | 5.79 | 5.44 | 6.14  | 94.42  | 236.04 |
| 2787 | 42.500 | 29.000 | 6.00 | 4.76 | 7.24  | 80.08  | 200.19 |
| 2788 | 42.750 | 29.000 | 6.83 | 6.00 | 7.66  | 75.69  | 189.22 |
| 2789 | 43.000 | 29.000 | 6.68 | 6.23 | 7.13  | 81.31  | 203.28 |
| 2790 | 43.250 | 29.000 | 6.67 | 5.96 | 7.38  | 78.56  | 196.40 |
| 2791 | 43.500 | 29.000 | 6.64 | 6.09 | 7.19  | 80.63  | 201.58 |
| 2792 | 43.750 | 29.000 | 6.88 | 4.19 | 9.57  | 60.59  | 151.47 |
| 2793 | 44.000 | 29.000 | 7.26 | 4.76 | 9.76  | 59.41  | 148.52 |
| 2794 | 44.250 | 29.000 | 6.32 | 5.09 | 7.55  | 76.79  | 191.98 |
| 2795 | 44.500 | 29.000 | 5.72 | 5.06 | 6.38  | 90.87  | 227.17 |
| 2796 | 44.750 | 29.000 | 6.75 | 4.57 | 8.93  | 64.93  | 162.32 |
| 2797 | 45.000 | 29.000 | 6.29 | 5.39 | 7.19  | 80.63  | 201.58 |
| 2798 | 45.250 | 29.000 | 6.17 | 5.81 | 6.53  | 88.78  | 221.95 |
| 2799 | 45.500 | 29.000 | 7.52 | 4.40 | 10.64 | 54.50  | 136.24 |
| 2800 | 45.750 | 29.000 | 6.57 | 4.41 | 8.73  | 66.41  | 166.04 |
| 2801 | 46.000 | 29.000 | 5.96 | 4.02 | 7.90  | 73.39  | 183.47 |

|      |        |        |      |      |       |       |        |
|------|--------|--------|------|------|-------|-------|--------|
| 2802 | 46.250 | 29.000 | 5.84 | 4.96 | 6.72  | 86.27 | 215.68 |
| 2803 | 46.500 | 29.000 | 6.07 | 5.33 | 6.81  | 85.13 | 212.83 |
| 2804 | 46.750 | 29.000 | 6.28 | 5.66 | 6.90  | 84.02 | 210.05 |
| 2805 | 47.000 | 29.000 | 6.30 | 5.99 | 6.61  | 87.71 | 219.27 |
| 2806 | 47.250 | 29.000 | 6.69 | 4.76 | 8.62  | 67.26 | 168.15 |
| 2807 | 47.500 | 29.000 | 6.15 | 5.53 | 6.77  | 85.63 | 214.09 |
| 2808 | 47.750 | 29.000 | 5.89 | 4.97 | 6.81  | 85.13 | 212.83 |
| 2809 | 48.000 | 29.000 | 6.72 | 5.90 | 7.54  | 76.89 | 192.23 |
| 2810 | 35.000 | 29.250 | 6.26 | 5.34 | 7.18  | 80.75 | 201.87 |
| 2811 | 35.250 | 29.250 | 6.84 | 5.39 | 8.29  | 69.94 | 174.85 |
| 2812 | 35.500 | 29.250 | 6.57 | 4.88 | 8.26  | 70.19 | 175.48 |
| 2813 | 35.750 | 29.250 | 6.94 | 5.65 | 8.23  | 70.45 | 176.12 |
| 2814 | 36.000 | 29.250 | 7.27 | 6.63 | 7.91  | 73.30 | 183.24 |
| 2815 | 36.250 | 29.250 | 6.35 | 5.45 | 7.25  | 79.97 | 199.92 |
| 2816 | 36.500 | 29.250 | 7.19 | 5.26 | 9.12  | 63.58 | 158.94 |
| 2817 | 36.750 | 29.250 | 7.84 | 4.99 | 10.69 | 54.24 | 135.60 |
| 2818 | 37.000 | 29.250 | 7.50 | 4.84 | 10.16 | 57.07 | 142.67 |
| 2819 | 37.250 | 29.250 | 6.17 | 5.31 | 7.03  | 82.47 | 206.17 |
| 2820 | 37.500 | 29.250 | 6.04 | 4.83 | 7.25  | 79.97 | 199.92 |
| 2821 | 37.750 | 29.250 | 6.70 | 4.94 | 8.46  | 68.53 | 171.33 |
| 2822 | 38.000 | 29.250 | 8.48 | 4.52 | 12.44 | 46.61 | 116.53 |
| 2823 | 38.250 | 29.250 | 8.08 | 4.44 | 11.72 | 49.48 | 123.69 |
| 2824 | 38.500 | 29.250 | 7.20 | 5.29 | 9.11  | 63.65 | 159.11 |
| 2825 | 38.750 | 29.250 | 9.48 | 5.66 | 13.30 | 43.60 | 109.00 |
| 2826 | 39.000 | 29.250 | 6.57 | 5.29 | 7.85  | 73.86 | 184.64 |
| 2827 | 39.250 | 29.250 | 8.73 | 6.39 | 11.07 | 52.38 | 130.95 |
| 2828 | 39.500 | 29.250 | 7.04 | 5.54 | 8.54  | 67.89 | 169.73 |
| 2829 | 39.750 | 29.250 | 7.20 | 5.14 | 9.26  | 62.61 | 156.54 |
| 2830 | 40.000 | 29.250 | 8.92 | 3.61 | 14.23 | 40.75 | 101.88 |
| 2831 | 40.250 | 29.250 | 5.38 | 2.41 | 8.35  | 69.44 | 173.59 |
| 2832 | 40.500 | 29.250 | 8.44 | 3.23 | 13.65 | 42.48 | 106.20 |
| 2833 | 40.750 | 29.250 | 6.38 | 3.57 | 9.19  | 63.09 | 157.73 |
| 2834 | 41.000 | 29.250 | 7.42 | 3.73 | 11.11 | 52.19 | 130.48 |
| 2835 | 41.250 | 29.250 | 5.63 | 3.44 | 7.82  | 74.14 | 185.35 |
| 2836 | 41.500 | 29.250 | 5.43 | 3.26 | 7.60  | 76.29 | 190.71 |
| 2837 | 41.750 | 29.250 | 6.53 | 4.74 | 8.32  | 69.69 | 174.22 |
| 2838 | 42.000 | 29.250 | 7.46 | 5.23 | 9.69  | 59.84 | 149.59 |
| 2839 | 42.250 | 29.250 | 6.66 | 3.12 | 10.20 | 56.85 | 142.12 |
| 2840 | 42.500 | 29.250 | 6.52 | 2.80 | 10.24 | 56.62 | 141.56 |
| 2841 | 42.750 | 29.250 | 5.47 | 2.99 | 7.95  | 72.93 | 182.32 |
| 2842 | 43.000 | 29.250 | 6.10 | 3.48 | 8.72  | 66.49 | 166.23 |
| 2843 | 43.250 | 29.250 | 6.89 | 3.49 | 10.29 | 56.35 | 140.87 |
| 2844 | 43.500 | 29.250 | 5.36 | 3.46 | 7.26  | 79.86 | 199.64 |
| 2845 | 43.750 | 29.250 | 6.11 | 4.10 | 8.12  | 71.40 | 178.51 |
| 2846 | 44.000 | 29.250 | 7.00 | 4.87 | 9.13  | 63.51 | 158.76 |
| 2847 | 44.250 | 29.250 | 6.14 | 4.38 | 7.90  | 73.39 | 183.47 |
| 2848 | 44.500 | 29.250 | 5.71 | 3.82 | 7.60  | 76.29 | 190.71 |
| 2849 | 44.750 | 29.250 | 6.11 | 4.05 | 8.17  | 70.97 | 177.41 |
| 2850 | 45.000 | 29.250 | 6.39 | 3.56 | 9.22  | 62.89 | 157.22 |
| 2851 | 45.250 | 29.250 | 6.47 | 2.89 | 10.05 | 57.69 | 144.24 |
| 2852 | 45.500 | 29.250 | 5.58 | 3.23 | 7.93  | 73.11 | 182.78 |
| 2853 | 45.750 | 29.250 | 6.24 | 5.91 | 6.57  | 88.24 | 220.60 |
| 2854 | 46.000 | 29.250 | 6.54 | 5.64 | 7.44  | 77.93 | 194.81 |

|      |        |        |      |      |       |       |        |
|------|--------|--------|------|------|-------|-------|--------|
| 2855 | 46.250 | 29.250 | 6.45 | 5.48 | 7.42  | 78.14 | 195.34 |
| 2856 | 46.500 | 29.250 | 6.38 | 5.42 | 7.34  | 78.99 | 197.47 |
| 2857 | 46.750 | 29.250 | 6.07 | 3.53 | 8.61  | 67.34 | 168.35 |
| 2858 | 47.000 | 29.250 | 6.19 | 3.34 | 9.04  | 64.14 | 160.35 |
| 2859 | 47.250 | 29.250 | 7.99 | 3.47 | 12.51 | 46.35 | 115.88 |
| 2860 | 47.500 | 29.250 | 7.98 | 3.83 | 12.13 | 47.80 | 119.51 |
| 2861 | 47.750 | 29.250 | 7.52 | 5.23 | 9.81  | 59.11 | 147.76 |
| 2862 | 48.000 | 29.250 | 8.19 | 3.94 | 12.44 | 46.61 | 116.53 |
| 2863 | 35.000 | 29.500 | 6.75 | 3.53 | 9.97  | 58.16 | 145.39 |
| 2864 | 35.250 | 29.500 | 5.36 | 3.37 | 7.35  | 78.88 | 197.20 |
| 2865 | 35.500 | 29.500 | 5.77 | 4.29 | 7.25  | 79.97 | 199.92 |
| 2866 | 35.750 | 29.500 | 5.62 | 3.48 | 7.76  | 74.71 | 186.78 |
| 2867 | 36.000 | 29.500 | 5.54 | 3.89 | 7.19  | 80.63 | 201.58 |
| 2868 | 36.250 | 29.500 | 6.19 | 3.61 | 8.77  | 66.11 | 165.28 |
| 2869 | 36.500 | 29.500 | 4.98 | 2.83 | 7.13  | 81.31 | 203.28 |
| 2870 | 36.750 | 29.500 | 6.75 | 2.57 | 10.93 | 53.05 | 132.63 |
| 2871 | 37.000 | 29.500 | 5.52 | 3.57 | 7.47  | 77.61 | 194.03 |
| 2872 | 37.250 | 29.500 | 6.61 | 3.97 | 9.25  | 62.68 | 156.71 |
| 2873 | 37.500 | 29.500 | 6.99 | 4.32 | 9.66  | 60.02 | 150.06 |
| 2874 | 37.750 | 29.500 | 5.66 | 3.28 | 8.04  | 72.11 | 180.28 |
| 2875 | 38.000 | 29.500 | 5.84 | 3.41 | 8.27  | 70.11 | 175.27 |
| 2876 | 38.250 | 29.500 | 5.51 | 3.57 | 7.45  | 77.82 | 194.55 |
| 2877 | 38.500 | 29.500 | 6.09 | 2.97 | 9.21  | 62.95 | 157.39 |
| 2878 | 38.750 | 29.500 | 5.69 | 4.47 | 6.91  | 83.90 | 209.75 |
| 2879 | 39.000 | 29.500 | 5.54 | 3.53 | 7.55  | 76.79 | 191.98 |
| 2880 | 39.250 | 29.500 | 5.60 | 3.76 | 7.44  | 77.93 | 194.81 |
| 2881 | 39.500 | 29.500 | 6.61 | 3.10 | 10.12 | 57.30 | 143.24 |
| 2882 | 39.750 | 29.500 | 6.00 | 3.74 | 8.26  | 70.19 | 175.48 |
| 2883 | 40.000 | 29.500 | 7.65 | 5.66 | 9.64  | 60.15 | 150.37 |
| 2884 | 40.250 | 29.500 | 6.71 | 3.38 | 10.04 | 57.75 | 144.38 |
| 2885 | 40.500 | 29.500 | 6.90 | 3.85 | 9.95  | 58.27 | 145.68 |
| 2886 | 40.750 | 29.500 | 6.96 | 3.48 | 10.44 | 55.54 | 138.85 |
| 2887 | 41.000 | 29.500 | 6.67 | 4.33 | 9.01  | 64.35 | 160.88 |
| 2888 | 41.250 | 29.500 | 6.19 | 4.21 | 8.17  | 70.97 | 177.41 |
| 2889 | 41.500 | 29.500 | 5.52 | 2.95 | 8.09  | 71.67 | 179.17 |
| 2890 | 41.750 | 29.500 | 5.79 | 3.46 | 8.12  | 71.40 | 178.51 |
| 2891 | 42.000 | 29.500 | 8.06 | 3.77 | 12.35 | 46.95 | 117.38 |
| 2892 | 42.250 | 29.500 | 6.32 | 2.56 | 10.08 | 57.52 | 143.81 |
| 2893 | 42.500 | 29.500 | 5.63 | 3.31 | 7.95  | 72.93 | 182.32 |
| 2894 | 42.750 | 29.500 | 6.11 | 3.09 | 9.13  | 63.51 | 158.76 |
| 2895 | 43.000 | 29.500 | 7.08 | 3.63 | 10.53 | 55.07 | 137.66 |
| 2896 | 43.250 | 29.500 | 6.27 | 3.44 | 9.10  | 63.72 | 159.29 |
| 2897 | 43.500 | 29.500 | 6.51 | 3.69 | 9.33  | 62.15 | 155.36 |
| 2898 | 43.750 | 29.500 | 6.48 | 3.11 | 9.85  | 58.87 | 147.16 |
| 2899 | 44.000 | 29.500 | 7.60 | 2.59 | 12.61 | 45.98 | 114.96 |
| 2900 | 44.250 | 29.500 | 7.66 | 3.61 | 11.71 | 49.52 | 123.79 |
| 2901 | 44.500 | 29.500 | 8.28 | 3.97 | 12.59 | 46.06 | 115.14 |
| 2902 | 44.750 | 29.500 | 6.36 | 2.92 | 9.80  | 59.17 | 147.91 |
| 2903 | 45.000 | 29.500 | 6.30 | 5.95 | 6.65  | 87.18 | 217.95 |
| 2904 | 45.250 | 29.500 | 8.30 | 6.61 | 9.99  | 58.04 | 145.10 |
| 2905 | 45.500 | 29.500 | 7.97 | 5.60 | 10.34 | 56.08 | 140.19 |
| 2906 | 45.750 | 29.500 | 7.84 | 4.31 | 11.37 | 51.00 | 127.49 |
| 2907 | 46.000 | 29.500 | 8.50 | 6.06 | 10.94 | 53.00 | 132.50 |

|      |        |        |       |      |       |       |        |
|------|--------|--------|-------|------|-------|-------|--------|
| 2908 | 46.250 | 29.500 | 10.28 | 5.75 | 14.81 | 39.15 | 97.89  |
| 2909 | 46.500 | 29.500 | 9.88  | 5.46 | 14.30 | 40.55 | 101.38 |
| 2910 | 46.750 | 29.500 | 9.00  | 5.53 | 12.47 | 46.50 | 116.25 |
| 2911 | 47.000 | 29.500 | 11.28 | 6.95 | 15.61 | 37.15 | 92.87  |
| 2912 | 47.250 | 29.500 | 8.37  | 5.68 | 11.06 | 52.43 | 131.07 |
| 2913 | 47.500 | 29.500 | 10.53 | 7.39 | 13.67 | 42.42 | 106.05 |
| 2914 | 47.750 | 29.500 | 8.84  | 7.23 | 10.45 | 55.49 | 138.72 |
| 2915 | 48.000 | 29.500 | 9.83  | 7.91 | 11.75 | 49.35 | 123.37 |
| 2916 | 35.000 | 29.750 | 8.38  | 5.66 | 11.10 | 52.24 | 130.60 |
| 2917 | 35.250 | 29.750 | 7.02  | 5.81 | 8.23  | 70.45 | 176.12 |
| 2918 | 35.500 | 29.750 | 9.71  | 3.81 | 15.61 | 37.15 | 92.87  |
| 2919 | 35.750 | 29.750 | 6.54  | 5.86 | 7.22  | 80.30 | 200.75 |
| 2920 | 36.000 | 29.750 | 6.86  | 5.62 | 8.10  | 71.58 | 178.95 |
| 2921 | 36.250 | 29.750 | 7.13  | 5.76 | 8.50  | 68.21 | 170.53 |
| 2922 | 36.500 | 29.750 | 7.15  | 5.28 | 9.02  | 64.28 | 160.70 |
| 2923 | 36.750 | 29.750 | 5.93  | 4.73 | 7.13  | 81.31 | 203.28 |
| 2924 | 37.000 | 29.750 | 6.54  | 5.07 | 8.01  | 72.38 | 180.96 |
| 2925 | 37.250 | 29.750 | 6.86  | 6.01 | 7.71  | 75.20 | 187.99 |
| 2926 | 37.500 | 29.750 | 8.21  | 6.65 | 9.77  | 59.35 | 148.37 |
| 2927 | 37.750 | 29.750 | 7.46  | 4.01 | 10.91 | 53.15 | 132.87 |
| 2928 | 38.000 | 29.750 | 6.99  | 4.29 | 9.69  | 59.84 | 149.59 |
| 2929 | 38.250 | 29.750 | 6.42  | 4.45 | 8.39  | 69.11 | 172.76 |
| 2930 | 38.500 | 29.750 | 6.82  | 5.00 | 8.64  | 67.11 | 167.77 |
| 2931 | 38.750 | 29.750 | 7.57  | 5.31 | 9.83  | 58.99 | 147.46 |
| 2932 | 39.000 | 29.750 | 6.47  | 5.47 | 7.47  | 77.61 | 194.03 |
| 2933 | 39.250 | 29.750 | 6.88  | 5.70 | 8.06  | 71.93 | 179.83 |
| 2934 | 39.500 | 29.750 | 7.29  | 5.80 | 8.78  | 66.04 | 165.09 |
| 2935 | 39.750 | 29.750 | 6.26  | 5.06 | 7.46  | 77.72 | 194.29 |
| 2936 | 40.000 | 29.750 | 6.84  | 5.20 | 8.48  | 68.37 | 170.93 |
| 2937 | 40.250 | 29.750 | 6.57  | 5.42 | 7.72  | 75.10 | 187.75 |
| 2938 | 40.500 | 29.750 | 6.94  | 4.94 | 8.94  | 64.86 | 162.14 |
| 2939 | 40.750 | 29.750 | 6.27  | 5.72 | 6.82  | 85.01 | 212.52 |
| 2940 | 41.000 | 29.750 | 5.39  | 4.75 | 6.03  | 96.14 | 240.34 |
| 2941 | 41.250 | 29.750 | 6.39  | 6.70 | 6.08  | 95.35 | 238.37 |
| 2942 | 41.500 | 29.750 | 6.84  | 7.04 | 6.64  | 87.31 | 218.27 |
| 2943 | 41.750 | 29.750 | 6.50  | 6.21 | 6.79  | 85.38 | 213.46 |
| 2944 | 42.000 | 29.750 | 6.17  | 5.20 | 7.14  | 81.20 | 203.00 |
| 2945 | 42.250 | 29.750 | 6.04  | 3.91 | 8.17  | 70.97 | 177.41 |
| 2946 | 42.500 | 29.750 | 6.70  | 5.66 | 7.74  | 74.91 | 187.27 |
| 2947 | 42.750 | 29.750 | 8.48  | 5.35 | 11.61 | 49.94 | 124.86 |
| 2948 | 43.000 | 29.750 | 8.08  | 5.06 | 11.10 | 52.24 | 130.60 |
| 2949 | 43.250 | 29.750 | 7.20  | 5.13 | 9.27  | 62.55 | 156.37 |
| 2950 | 43.500 | 29.750 | 9.48  | 6.55 | 12.41 | 46.73 | 116.81 |
| 2951 | 43.750 | 29.750 | 6.57  | 5.28 | 7.86  | 73.76 | 184.41 |
| 2952 | 44.000 | 29.750 | 6.19  | 4.33 | 8.05  | 72.02 | 180.06 |
| 2953 | 44.250 | 29.750 | 8.33  | 7.54 | 9.12  | 63.58 | 158.94 |
| 2954 | 44.500 | 29.750 | 8.37  | 4.40 | 12.34 | 46.99 | 117.48 |
| 2955 | 44.750 | 29.750 | 6.41  | 5.68 | 7.14  | 81.20 | 203.00 |
| 2956 | 45.000 | 29.750 | 8.44  | 5.89 | 10.99 | 52.76 | 131.90 |
| 2957 | 45.250 | 29.750 | 8.17  | 4.91 | 11.43 | 50.73 | 126.83 |
| 2958 | 45.500 | 29.750 | 8.06  | 6.39 | 9.73  | 59.59 | 148.98 |
| 2959 | 45.750 | 29.750 | 6.11  | 4.60 | 7.62  | 76.09 | 190.21 |
| 2960 | 46.000 | 29.750 | 7.04  | 6.73 | 7.35  | 78.88 | 197.20 |



|      |        |        |      |      |       |       |        |
|------|--------|--------|------|------|-------|-------|--------|
| 2961 | 46.250 | 29.750 | 7.99 | 5.88 | 10.10 | 57.41 | 143.52 |
| 2962 | 46.500 | 29.750 | 7.67 | 5.81 | 9.53  | 60.84 | 152.10 |
| 2963 | 46.750 | 29.750 | 7.78 | 4.77 | 10.79 | 53.74 | 134.35 |
| 2964 | 47.000 | 29.750 | 6.03 | 4.59 | 7.47  | 77.61 | 194.03 |
| 2965 | 47.250 | 29.750 | 7.05 | 7.04 | 7.06  | 82.12 | 205.30 |
| 2966 | 47.500 | 29.750 | 6.53 | 5.19 | 7.87  | 73.67 | 184.17 |
| 2967 | 47.750 | 29.750 | 6.23 | 5.54 | 6.92  | 83.78 | 209.45 |
| 2968 | 48.000 | 29.750 | 9.18 | 4.99 | 13.37 | 43.37 | 108.43 |
| 2969 | 35.000 | 30.000 | 6.03 | 5.50 | 6.56  | 88.37 | 220.94 |
| 2970 | 35.250 | 30.000 | 6.57 | 5.39 | 7.75  | 74.81 | 187.02 |
| 2971 | 35.500 | 30.000 | 6.46 | 4.25 | 8.67  | 66.87 | 167.19 |
| 2972 | 35.750 | 30.000 | 6.88 | 5.18 | 8.58  | 67.58 | 168.94 |
| 2973 | 36.000 | 30.000 | 6.99 | 5.19 | 8.79  | 65.96 | 164.90 |
| 2974 | 36.250 | 30.000 | 6.49 | 4.70 | 8.28  | 70.02 | 175.06 |
| 2975 | 36.500 | 30.000 | 7.47 | 5.96 | 8.98  | 64.57 | 161.42 |
| 2976 | 36.750 | 30.000 | 5.98 | 5.03 | 6.93  | 83.66 | 209.14 |
| 2977 | 37.000 | 30.000 | 5.79 | 4.66 | 6.92  | 83.78 | 209.45 |
| 2978 | 37.250 | 30.000 | 5.60 | 5.05 | 6.15  | 94.26 | 235.66 |
| 2979 | 37.500 | 30.000 | 5.74 | 5.32 | 6.16  | 94.11 | 235.28 |
| 2980 | 37.750 | 30.000 | 6.59 | 6.86 | 6.32  | 91.73 | 229.32 |
| 2981 | 38.000 | 30.000 | 5.82 | 5.23 | 6.41  | 90.44 | 226.10 |
| 2982 | 38.250 | 30.000 | 5.79 | 5.44 | 6.14  | 94.42 | 236.04 |
| 2983 | 38.500 | 30.000 | 6.00 | 4.76 | 7.24  | 80.08 | 200.19 |
| 2984 | 38.750 | 30.000 | 6.83 | 6.00 | 7.66  | 75.69 | 189.22 |
| 2985 | 39.000 | 30.000 | 6.68 | 6.23 | 7.13  | 81.31 | 203.28 |
| 2986 | 39.250 | 30.000 | 6.67 | 5.96 | 7.38  | 78.56 | 196.40 |
| 2987 | 39.500 | 30.000 | 6.57 | 5.40 | 7.74  | 74.91 | 187.27 |
| 2988 | 39.750 | 30.000 | 6.42 | 6.35 | 6.49  | 89.33 | 223.32 |
| 2989 | 40.000 | 30.000 | 6.41 | 5.92 | 6.90  | 84.02 | 210.05 |
| 2990 | 40.250 | 30.000 | 6.47 | 6.01 | 6.93  | 83.66 | 209.14 |
| 2991 | 40.500 | 30.000 | 6.37 | 5.98 | 6.76  | 85.76 | 214.40 |
| 2992 | 40.750 | 30.000 | 5.85 | 4.98 | 6.72  | 86.27 | 215.68 |
| 2993 | 41.000 | 30.000 | 5.52 | 4.81 | 6.23  | 93.05 | 232.63 |
| 2994 | 41.250 | 30.000 | 5.50 | 4.89 | 6.11  | 94.88 | 237.20 |
| 2995 | 41.500 | 30.000 | 6.11 | 6.24 | 5.98  | 96.94 | 242.35 |
| 2996 | 41.750 | 30.000 | 6.10 | 6.26 | 5.94  | 97.59 | 243.98 |
| 2997 | 42.000 | 30.000 | 5.65 | 5.25 | 6.05  | 95.82 | 239.55 |
| 2998 | 42.250 | 30.000 | 5.56 | 4.98 | 6.14  | 94.42 | 236.04 |
| 2999 | 42.500 | 30.000 | 5.51 | 5.07 | 5.95  | 97.43 | 243.57 |
| 3000 | 42.750 | 30.000 | 6.91 | 7.21 | 6.61  | 87.71 | 219.27 |
| 3001 | 43.000 | 30.000 | 6.72 | 5.35 | 8.09  | 71.67 | 179.17 |
| 3002 | 43.250 | 30.000 | 7.00 | 5.53 | 8.47  | 68.45 | 171.13 |
| 3003 | 43.500 | 30.000 | 6.69 | 4.92 | 8.46  | 68.53 | 171.33 |
| 3004 | 43.750 | 30.000 | 5.96 | 4.02 | 7.90  | 73.39 | 183.47 |
| 3005 | 44.000 | 30.000 | 5.84 | 4.96 | 6.72  | 86.27 | 215.68 |
| 3006 | 44.250 | 30.000 | 6.07 | 5.33 | 6.81  | 85.13 | 212.83 |
| 3007 | 44.500 | 30.000 | 6.28 | 5.66 | 6.90  | 84.02 | 210.05 |
| 3008 | 44.750 | 30.000 | 6.30 | 5.99 | 6.61  | 87.71 | 219.27 |
| 3009 | 45.000 | 30.000 | 6.69 | 4.76 | 8.62  | 67.26 | 168.15 |
| 3010 | 45.250 | 30.000 | 6.15 | 5.53 | 6.77  | 85.63 | 214.09 |
| 3011 | 45.500 | 30.000 | 5.89 | 4.97 | 6.81  | 85.13 | 212.83 |
| 3012 | 45.750 | 30.000 | 6.72 | 5.90 | 7.54  | 76.89 | 192.23 |
| 3013 | 46.000 | 30.000 | 6.30 | 5.72 | 6.88  | 84.27 | 210.66 |

|      |        |        |      |      |      |       |        |
|------|--------|--------|------|------|------|-------|--------|
| 3014 | 46.250 | 30.000 | 6.67 | 6.19 | 7.15 | 81.08 | 202.71 |
| 3015 | 46.500 | 30.000 | 7.06 | 5.98 | 8.14 | 71.23 | 178.07 |
| 3016 | 46.750 | 30.000 | 7.27 | 5.52 | 9.02 | 64.28 | 160.70 |
| 3017 | 47.000 | 30.000 | 5.88 | 5.35 | 6.41 | 90.44 | 226.10 |
| 3018 | 47.250 | 30.000 | 7.20 | 5.15 | 9.25 | 62.68 | 156.71 |
| 3019 | 47.500 | 30.000 | 6.78 | 6.01 | 7.55 | 76.79 | 191.98 |
| 3020 | 47.750 | 30.000 | 6.69 | 5.89 | 7.49 | 77.41 | 193.51 |
| 3021 | 48.000 | 30.000 | 6.30 | 5.07 | 7.53 | 76.99 | 192.49 |
